# Supplementary material for: Medical management of acute upper respiratory infections in an urban primary care out-of-hours facility: cross-sectional study of patient presentations and expectations
Source: PubMed Central journal article supplement — BMJ Open. 2019 Feb 15;9(2):e025396. doi: 10.1136/bmjopen-2018-025396 (PMC6398638; doi:10.1136/bmjopen-2018-025396), 2019-02-15
Supplement: bmjopen-2018-025396.draft_revisions.pdf [file bmjopen-2018-025396.draft_revisions.pdf]

# BMJ Open

BMJ Open is committed to open peer review. As part of this commitment we make the peer review history of every article we publish publicly available.

When an article is published we post the peer reviewers' comments and the authors' responses online. We also post the versions of the paper that were used during peer review. These are the versions that the peer review comments apply to.

The versions of the paper that follow are the versions that were submitted during the peer review process. They are not the versions of record or the final published versions. They should not be cited or distributed as the published version of this manuscript.

BMJ Open is an open access journal and the full, final, typeset and author-corrected version of record of the manuscript is available on our site with no access controls, subscription charges or pay-per-view fees (<http://bmjopen.bmj.com>).

If you have any questions on BMJ Open's open peer review process please email [info.bmjopen@bmj.com](mailto:info.bmjopen@bmj.com)

# BMJ Open

## Medical Management of Acute Respiratory Infections in an Out of Hours Centre; Patient Presentations and Expectations

|                               |                                                                                                                                                                                                                                                                                                                                                                                                                                                                                                                   |
|-------------------------------|-------------------------------------------------------------------------------------------------------------------------------------------------------------------------------------------------------------------------------------------------------------------------------------------------------------------------------------------------------------------------------------------------------------------------------------------------------------------------------------------------------------------|
| Journal:                      | <i>BMJ Open</i>                                                                                                                                                                                                                                                                                                                                                                                                                                                                                                   |
| Manuscript ID                 | bmjopen-2018-025396                                                                                                                                                                                                                                                                                                                                                                                                                                                                                               |
| Article Type:                 | Research                                                                                                                                                                                                                                                                                                                                                                                                                                                                                                          |
| Date Submitted by the Author: | 13-Jul-2018                                                                                                                                                                                                                                                                                                                                                                                                                                                                                                       |
| Complete List of Authors:     | O'Connor, Raymond; University of Limerick Faculty of Education and Health Sciences, Graduate Entry Medical School<br>O'Doherty, Jane; University of Limerick Faculty of Education and Health Sciences, Graduate Entry Medical School<br>O'Regan, Andrew; University of Limerick Faculty of Education and Health Sciences, Graduate Entry Medical School<br>O'Neill, Aoife; University of Limerick, Mathematics and Statistics<br>McMahon, Claire; Shannondoc Out of Hours GP Service<br>Dunne, C.; Univ Limerick, |
| Keywords:                     | out-of-hours, upper respiratory tract infection, antibacterial agent, patient expectations, antibiotic prescription                                                                                                                                                                                                                                                                                                                                                                                               |
|                               |                                                                                                                                                                                                                                                                                                                                                                                                                                                                                                                   |

SCHOLARONE™  
Manuscripts

1  
2  
3 **1 Medical Management of Acute Respiratory Infections in an Out of Hours Centre;**  
4  
5 **2 Patient Presentations and Expectations**  
6

7  
8 **3 Authors:**  
9

10  
11 4 Ray O'Connor<sup>1</sup>  
12

13  
14 5 Jane O'Doherty<sup>2</sup>  
15

16  
17 6 Andrew O'Regan<sup>3</sup>  
18

19  
20 7 Aoife O'Neill<sup>4</sup>  
21

22  
23 8 Claire McMahon<sup>5</sup>  
24

25  
26 9 Colum Dunne<sup>6</sup>  
27

28  
29 10

30  
31 11 <sup>1</sup>Corresponding author: Dr. Ray O'Connor  
32

33  
34 12 Senior Research Fellow, Graduate Entry Medical School, University of Limerick, Ireland  
35

36  
37 13 Email: [Raymond.OConnor@ul.ie](mailto:Raymond.OConnor@ul.ie)  
38

39  
40 14 Telephone: 061234851  
41

42  
43 15

44  
45 16 <sup>2</sup>Ms. Jane O'Doherty  
46

47  
48 17 Research Assistant, Graduate Entry Medical School, University of Limerick, Ireland  
49

50  
51 18 Email: [Jane.ODoherty@ul.ie](mailto:Jane.ODoherty@ul.ie)  
52

53  
54 19

55  
56 20 <sup>3</sup>Dr. Andrew O'Regan  
57

1  
2  
3 21 Senior Lecturer in General Practice, Graduate Entry Medical School, University of Limerick,  
4  
5 22 Ireland

6  
7  
8 23 Email: [Andrew.OREgan@ul.ie](mailto:Andrew.OREgan@ul.ie)  
9

10  
11 24

12  
13 25 <sup>4</sup>Ms Aoife O'Neill

14  
15  
16 26 PhD Candidate, Graduate Entry Medical School, University of Limerick, Ireland

17  
18  
19 27 Email: [Aoife.ONeill@ul.ie](mailto:Aoife.ONeill@ul.ie)  
20

21  
22 28

23  
24 29 <sup>5</sup>Claire McMahon

25  
26  
27 30 Clinical Quality Manager,

28  
29 31 Shannondoc Out of Hours GP Service, Shelbourne Rd., Limerick Ireland

30  
31 32 Email: [clairemcmahon@shannondoc.ie](mailto:clairemcmahon@shannondoc.ie)  
32

33  
34 33

35  
36 34 Prof. Colum Dunne

37  
38  
39 35 Director of Research (GEMS) & Founding Director of Centre for Interventions in Infection,

40  
41 36 Inflammation & Immunity (41), Graduate Entry Medical School, University of Limerick,

42  
43 37 Ireland

44  
45  
46 38 Email: [Colum.Dunne@ul.ie](mailto:Colum.Dunne@ul.ie)  
47

48  
49 39  
50

51  
52 40  
53

54  
55 41  
56

1  
2  
3 42 **Abstract**  
4

5 43 **Objectives:** The purpose of this study was to examine patients' expectations of clinical  
6  
7 44 examination, symptom management, information on their condition, reassurance, antibiotic  
8  
9 45 treatment and other possible options including referral  
10

11  
12 46 **Design:** Cross-sectional design  
13

14  
15 47 **Setting:** One primary care out of hours GP centre located in the Mid-West  
16  
17

18 48 **Participants:** 457 patients filled out a questionnaire while waiting in the out of hours service.  
19  
20 49 22 surveys were excluded as the patients did not present with symptoms of acute respiratory  
21  
22 50 tract infections resulting in 435 patients' data being included in this study. There were 59.5%  
23  
24 51 female participants and 40.5% male participants.  
25  
26

27 52 **Results:** 435 patients with ARTI symptoms participated in the survey, representing 3.8% of  
28  
29 53 the total number of face-to-face consultations with ARTI patients at the primary care OOH  
30  
31 54 facility during the study period (n=11455). Of the study participants, 43% were aged under  
32  
33 55 six years and 60% were female. The most common presenting symptoms were cough (72%),  
34  
35 56 throat ache (46%) and common cold (26%). The most common expectations were for further  
36  
37 57 examination (53%), reassurance (51%), information (49%) and medication for cough (47%),  
38  
39 58 with 34% expecting an antibiotic.  
40  
41  
42

43 59 **Conclusions:** Only one in three patients attending this primary care out of hours facility with  
44  
45 60 ARTI symptoms had an expectation of antibiotics, with most seeking further assessment,  
46  
47 61 information and reassurance. Recognition of such expectations may be important  
48  
49 62 considerations for clinicians when deciding on management options for ARTI patients.  
50  
51

52 63 **Patient and Public Involvement:** Patients were not involved in the design of the study  
53  
54 64 Patient data was collected but not identifying data was included in this study. Patients were  
55  
56  
57  
58  
59  
60

1  
2  
3 65 recruited by staff at the out of hours service based on their physical symptoms of ARTI.  
4  
5 66 Patients will be able to view the results of this study when it published in a peer reviewed  
6  
7 67 journal.  
8  
9

10 68

11  
12  
13 69 **Word Count:** 3848  
14

15 70

### 18 71 **Strengths and Limitations**

- 21 72 • Patients or guardians filling in the short and anonymous questionnaire before the  
22  
23 73 consultation in the waiting room meant that respondents were more likely to be honest  
24  
25 74 in their opinion.  
26  
27
- 28 75 • The age and gender profile of our sample is very similar to that of the population  
29  
30 76 attending during the study period with ARTI symptoms.  
31  
32
- 33 77 • The higher number of private patient respondents helped to ensure that the finding  
34  
35 78 that they do not expect antibiotics is reliable, because this bigger number is more  
36  
37 79 likely to contain a spectrum of those who have different views on antibiotic  
38  
39  
40 80 prescription for their ARTI.  
41  
42
- 43 81 • Our study surveyed people attending only one OOH service. It is possible that those  
44  
45 82 who refused to participate in the survey were more severely ill than those who did and  
46  
47 83 were more likely to look for antibiotics (approximately 5% of those requested, refused  
48  
49 84 to participate).  
50
- 51 85 • Also while every effort was made to ensure that this was a representative sample of  
52  
53 86 those attending with ARTI, it is possible that the results were skewed as those eligible  
54  
55  
56  
57  
58  
59

1  
2  
3 87  
4  
5 88  
6  
7  
8 89  
9  
10 90  
11  
12  
13 91  
14  
15  
16 92  
17  
18  
19 93  
20  
21  
22 94  
23  
24  
25 95  
26  
27 96  
28  
29  
30 97  
31  
32  
33 98  
34  
35  
36 99  
37  
38 100  
39  
40  
41 101  
42  
43  
44 102  
45  
46  
47 103  
48  
49  
50 104  
51  
52 105  
53  
54  
55 106  
56  
57  
58  
59  
60

for free care was slightly lower than the centres overall population. However the age and gender profile was similar to the general attendees over the study period.

For peer review only

## 107 BACKGROUND

108 Antimicrobial or antibiotic resistance (AMR) is a growing threat to global public health [1].

109 Increasing consumption of antibiotics is associated with the development of antibiotic  
110 resistance at individual, community, national and international levels [2-5]. It is estimated  
111 that 25,000 people in the EU die annually as a result of infections caused by resistant  
112 bacteria, at a societal cost of approximately €1.5 billion annually [6]. Over the last 30 years,  
113 no major new types of antibiotics have been developed [7]. Therefore, antibiotic stewardship  
114 programmes, aiming to ensure the judicious use of antimicrobials by preventing their  
115 unnecessary use, have been established [1, 8-12].

116 Acute respiratory tract infection (ARTI), which incorporates the term “upper respiratory  
117 infection” (URTI), is the most common reason for antibiotic prescription in adults and  
118 children [13], and these prescriptions are often inappropriate [13-14]. Typically,  
119 inappropriate antibiotic prescribing occurs when a doctor prescribes an antibiotic that is not  
120 clinically indicated. The benefits of antibiotics are marginal for the management of most  
121 cases of ARTI [15-22], including sore throat [23-24]. Internationally, research shows that,  
122 with few exceptions [25], inappropriate prescribing of antibiotics for patients with mainly  
123 URTI is common [26-30]. This is thought to be related to a poor standard of knowledge  
124 among the general public regarding the usefulness of antibiotics in ARTI, with widespread  
125 belief, for example, that antibiotics work well for treating viral infections [31-32].

126 It has been reported that 75% of overall antibiotic prescribing takes place in primary care  
127 [33]. For example, the majority of outpatient antibiotic prescriptions in the USA are for  
128 ARTIs [14, 34]. In Ireland, the UK and many other countries, out of hours (OOH) services  
129 are an integral part of primary care provision, providing primary care outside of ‘core’  
130 contracted hours during weekday evenings and nights and on weekends or bank holidays.



1  
2  
3 131 This care is usually for clinical cases that are deemed to be of sufficiently urgent nature that  
4  
5 132 they cannot wait until the next available routine consulting period. Internationally, ARTIs are  
6  
7 133 estimated to constitute 9% of the consultations in general practice, while the corresponding  
8  
9 134 proportion in the OOH service is 16.7% [35]. Hence, this service handles a substantial  
10  
11 135 proportion of ARTIs and is, thereby, potentially an important contributor to overall antibiotic  
12  
13 136 consumption.

14  
15  
16 137 Patterns of antibiotic prescribing that clearly do not adhere to guidelines have been reported  
17  
18 138 [36 - 37]. In some regions, this has contributed to a 25% rate of antibiotic prescribing for  
19  
20 139 children with fever in an OOH setting [38]. Giesen described how national clinical guidelines  
21  
22 140 are not suited to the context of the OOH setting leading to clinical uncertainty for doctors  
23  
24 141 [39]. This has resulted in quality of antibiotic prescribing being less than optimal [40]. Trends  
25  
26 142 in prescribing have also suggested that there may be a partial displacement of antibiotic  
27  
28 143 prescribing from in-hours to the OOH setting, where patients with acute infective symptoms  
29  
30 144 seeking antibiotics present to the OOH service after refusal by the in-hours general practice  
31  
32 145 [41]. In contrast, other studies have shown antibiotic prescription rates to be similar in the  
33  
34 146 OOH setting compared with the daytime in-hours setting [35, 42].  
35  
36  
37

38 147  
39  
40 148 While it is true that poor public understanding of the usefulness of antibiotics in ARTI may  
41  
42 149 increase patient expectation for antibiotic prescription, there is evidence that clinical  
43  
44 150 examination and explanation of the diagnosis is important to patients' satisfaction with the  
45  
46 151 consultation [43]. It has also been shown that taking a patient's concerns seriously,  
47  
48 152 conducting a physical examination, communicating a treatment plan and explaining treatment  
49  
50 153 decisions all increase patient satisfaction with the management of ARTI [44].  
51  
52  
53  
54  
55  
56  
57  
58  
59  
60

1  
2  
3 154 One of the most important factors influencing doctors prescribing of antibiotics for ARTI is  
4  
5 155 patient expectation [45-59]. However, doctors often overestimate the level of this expectation  
6  
7 156 [54, 60-63].  
8  
9

10 157 Hence, there is an important need to determine what patients presenting to an OOH centre  
11  
12 158 with ARTI symptoms are expecting from their consultation with the healthcare professional  
13  
14 159 (HCP). The purpose of this study was to examine patients' expectations of clinical  
15  
16 160 examination, symptom management, information on their condition, reassurance, antibiotic  
17  
18 161 treatment and other possible options including referral. This insight into patient expectation  
19  
20 162 will inform HCPs dealing with patients presenting with ARTI in an OOH setting.  
21  
22  
23  
24  
25

## 26 164 **METHODS**

### 27 28 29 165 **Study Setting**

30  
31  
32 166 The 'Shannodoc' primary care OOH facility (hereinafter referred to as 'the OOH facility')  
33  
34 167 in Limerick City, in the Mid-West of Ireland is the regional primary care setting for treating  
35  
36 168 patients between the hours of 6 pm to 8 am on weekdays and at all hours over weekends. The  
37  
38 169 OOH facility has a mixed private-public system with 45% of the population eligible for free  
39  
40 170 care under a means-tested General Medical Services (GMS) card or doctor visit only card  
41  
42 171 which is issued by the Irish Health Service Executive [64]. Eligibility criteria for free medical  
43  
44 172 care include: age under six or over 70 years; or earning below a certain figure based on  
45  
46 173 family size. This group is hereinafter referred to as those eligible for free care. GPs (general  
47  
48 174 practitioners) (who are self-employed) are paid a 'per capita' fee by the state for their care.  
49  
50 175 These patients do not pay directly for GP consultations whereas patients without a card pay  
51  
52 176 an average of €55 per consultation.  
53  
54  
55

56 177  
57  
58  
59  
60

1  
2  
3 178 **Participants**  
4

5 179 Each day reception staff distributed the paper-based questionnaires along with information  
6  
7 180 and consent forms to patients in the waiting room, prior to their consultation. Only patients  
8  
9 181 attending with symptoms of ARTI were invited to participate in the study. For those aged  
10  
11 182 under 18 years, parents or guardians were asked to complete the questionnaire. Reception  
12  
13 183 staff were briefed by a member of the research team (ROC) on the aims of the study and  
14  
15 184 given a list of ARTI symptoms. All questionnaires were completed at the OOH facility.  
16  
17 185 Completed forms were securely stored in the University of Limerick Graduate Entry Medical  
18  
19 186 School building.  
20  
21  
22  
23  
24  
25

26 188 **Sample size**  
27  
28

29 189 It was calculated that a random sample of 400 patients would be required to estimate the  
30  
31 190 percentage of patients expecting a prescription for antibiotics with 95% confidence and a  
32  
33 191 margin of error of 5%. Our sample represents 3.8% (n= 435) of the total number of face-to-  
34  
35 192 face consultations for ARTI at the OOH facility from October 2017-February 2018  
36  
37 193 (n=11455).  
38  
39

40 194

41  
42  
43 195 **Measures**  
44

45 196 The questionnaire used was adapted from an instrument used by a recent study of patient  
46  
47 197 experiences of antibiotic prescribing by non-medical practitioners [44]. The modifications  
48  
49 198 made to the original instrument were: eliminating the post consultation element which asked  
50  
51 199 patients what treatment they were given and ranking their satisfaction with various aspects of  
52  
53 200 the consultation. All patients provided information regarding their age, gender, eligibility for  
54  
55  
56  
57  
58  
59

1  
2  
3 201 free care and whether this was their first consultation with their GP or the OOH facility for  
4  
5 202 the current complaint.  
6

7  
8 203 Other data collected included:  
9

- 10  
11 204 • Expecting antibiotics: Yes, no, unsure  
12  
13 205 • Reasons for seeing the GP: Earache or ear discharge, complaints of nose/sinuses,  
14  
15 206 common cold, throat ache, cough, other reasons e.g. flu like symptoms  
16  
17 207 • What did they expect to receive from the GP: Further examination, information,  
18  
19 208 reassurance, medication for pain relief, nose drops, medication for cough, referral to  
20  
21 209 hospital or specialist, other  
22  
23

24  
25 210

## 26 27 211 **Data analysis**

28  
29  
30 212 Descriptive statistics were used to explore the demographic profile, patient symptoms and  
31  
32 213 patient expectations. Variables were summarized using graphical and numeric descriptive  
33  
34 214 statistics. Categorical variables were described using counts and percentages. The  
35  
36 215 demographic characteristics of the sample and known characteristics of the population  
37  
38 216 attending the OOH facility with ARTI symptoms were compared. The percentage of the  
39  
40 217 sample with an expectation of antibiotics was calculated with a 95% confidence interval. The  
41  
42 218 Pearson's chi-squared test was used to investigate associations between categorical variables.  
43  
44 219 SPSS Version 24 and R software were used for the statistical analysis. Ethical approval for  
45  
46 220 the study was granted by the Health Service Executive Mid-West Research Ethics  
47  
48 221 Committee.  
49

50  
51  
52 222

## 53 54 55 223 **RESULTS**

224 **Patient characteristics**

225 A total of 457 questionnaires were collected during the time period of the study. When  
 226 reviewing the data, 22 questionnaires were excluded as patients presented with non-ARTI  
 227 symptoms. This yielded a total of 435 questionnaires related to patients with symptoms of  
 228 ARTI. Patient characteristics and pre-consultation expectation for antibiotic treatment are  
 229 summarised in Table 1.

230

231 The majority of the sample was female (60%) and over half (56%) were eligible for free care.  
 232 The most common age group was under six years of age (43%). Two hundred and twenty one  
 233 respondents (50.8%) indicated that this was not their first consultation for this illness. The  
 234 demographic characteristics of the sample and known characteristics of the population  
 235 attending the OOH facility with ARTI symptoms are presented in Supplementary Material  
 236 (Tables A, B and C). Compared to the demographic characteristics of the population  
 237 attending the OOH facility with ARTI, patients who were eligible for free care were under-  
 238 represented in the sample (56% vs 74%). The age and gender profile of our sample compared  
 239 to the OOH facility was similar (see Supplementary Material; Tables A, B and C).

240

241 Table 1: Patient characteristics and pre-consultation expectations of antibiotics (n=435)

242

| <b>Patient Characteristics and pre-consultation expectations</b> | <b>N (%)</b> |
|------------------------------------------------------------------|--------------|
| <b>Gender</b>                                                    |              |
| Male                                                             | 176 (40.5)   |
| Female                                                           | 259 (59.5)   |

|                                                      |            |
|------------------------------------------------------|------------|
| <b>Age (Years)</b>                                   |            |
| Under 6                                              | 186 (42.8) |
| 6-25                                                 | 130 (29.9) |
| 25-55                                                | 96 (22.1)  |
| 56+                                                  | 23 (5.3)   |
| <b>Eligibility for Free Care</b>                     |            |
| Yes                                                  | 244 (56.1) |
| No                                                   | 191 (43.9) |
| <b>First medical consultation for this complaint</b> |            |
| Yes                                                  | 214 (49.2) |
| No                                                   | 221 (50.8) |

243

### 244 **Presenting Symptoms**

245 Patients presented with varying symptoms; many of them reported multiple symptoms.

246 Cough was the most common (72%), followed by throat ache (46%). The least common  
 247 symptoms included earache or discharge (15%) and complaints of nose/sinuses (24.1%).

248 These symptoms are displayed in Table 2.

249

### 250 **Patient Expectations**

251 The most commonly expressed expectations were for further examination (53%), reassurance  
 252 (51%), information (49%) and medication for cough (47%). Patients least expected to receive  
 253 nose drops (5%) or a referral to hospital or specialist (3%). Thirty four percent (95% CI =  
 254 30%, 39%) of patients expected to receive an antibiotic, 10% (95% CI = 8%, 14%) did not  
 255 expect to receive and antibiotic and the majority (55%, 95% CI = 50%, 60%) were unsure

256 whether they would need an antibiotic or not (Table 1). There was no association found  
 257 between expectation of antibiotics and eligibility for free care (Pearson's Chi-Squared test,  
 258  $p=0.22$ ). There was a statistically significant difference in expecting an antibiotic for gender  
 259 ( $p=0.008$ ) and age ( $p=0.026$ ). Males were less likely to expect an antibiotic than females  
 260 (16% compared to 7%). While older people (56+) are more likely to be 'unsure' whether they  
 261 will need antibiotics or not (70%).

263 Figure 1: Patient Overall Expectations

265 **Differences between patient expectation, expecting an antibiotic and symptom presented**

266 Patient expectations for each symptom are described in Table 2. No differences were  
 267 observed across any symptoms presented, for expecting further examination, information or  
 268 reassurance, with approximately half those who presented with each symptom expected to  
 269 receive these treatments. Patients presenting with symptoms of an earache (67%) or cough  
 270 (65%) were more likely to expect pain relief. Patients presenting with sinusitis (60%) or  
 271 cough (62%) symptoms were more likely to expect cough medication.

273 Table 2: Patient Expectations for each symptom

|          | Patient Expectation |      |          |                |               |                   |          |
|----------|---------------------|------|----------|----------------|---------------|-------------------|----------|
| Symptom* | Further<br>Exam     | Info | Reassure | Pain<br>relief | Nose<br>Drops | Cough<br>Medicine | Referral |
|          |                     |      |          |                |               |                   |          |

|                                                                                                         | Yes           | Yes           | Yes           | Yes           | Yes          | Yes           | Yes         |
|---------------------------------------------------------------------------------------------------------|---------------|---------------|---------------|---------------|--------------|---------------|-------------|
| Overall expectation**                                                                                   | <b>528</b>    | <b>501</b>    | <b>521</b>    | <b>426</b>    | <b>71</b>    | <b>510</b>    | <b>38</b>   |
| Earache<br>(n=64, 14.7%)                                                                                | 39<br>(60.9)  | 34<br>(53.1)  | 30<br>(46.9)  | 43<br>(67.2)  | 6<br>(9.4)   | 23<br>(35.9)  | 0<br>(0.0)  |
| Sinuses<br>(n=105, 24.1%)                                                                               | 53<br>(50.5)  | 56<br>(53.3)  | 53<br>(50.5)  | 47<br>(44.8)  | 14<br>(13.3) | 63<br>(60.0)  | 5<br>(4.8)  |
| Common cold<br>(n=114, 26.2%)                                                                           | 64<br>(56.1)  | 54<br>(47.4)  | 62<br>(54.4)  | 53<br>(46.5)  | 10<br>(8.8)  | 64<br>(56.1)  | 5<br>(4.4)  |
| Throat Ache<br>(n=202, 46.4%)                                                                           | 104<br>(51.5) | 99<br>(49.0)  | 96<br>(47.5)  | 115<br>(56.9) | 13<br>(6.4)  | 101<br>(50.0) | 8<br>(4.0)  |
| Cough<br>(n=314, 72.2%)                                                                                 | 164<br>(52.2) | 159<br>(50.6) | 161<br>(51.3) | 109<br>(34.7) | 19<br>(6.1)  | 195<br>(62.1) | 12<br>(3.8) |
| Other<br>(n=169, 38.9%)                                                                                 | 104<br>(61.5) | 99<br>(58.6)  | 119<br>(70.4) | 59<br>(34.9)  | 9<br>(5.3)   | 64<br>(37.9)  | 8<br>(4.7)  |
| Counts (%) presented.                                                                                   |               |               |               |               |              |               |             |
| *Represents those who presented with symptom (yes response)                                             |               |               |               |               |              |               |             |
| ** As many patients presented with multiple symptoms, the count exceeds the number of patients surveyed |               |               |               |               |              |               |             |

275 *Abbreviations: Further Exam: further examination; Info: Information*

276

277 Table 3 presents differences in antibiotic expectations. Patients presenting with symptoms of  
 278 an earache (44%) or throat ache (39%) were most likely to expect antibiotics. The majority of  
 279 patients across all symptoms were 'unsure' whether they would require antibiotics.



280 Table 3: Antibiotic expectations of those presenting with different symptoms

| Symptoms*                                                    | Patients expecting an antibiotic |                     |                          |
|--------------------------------------------------------------|----------------------------------|---------------------|--------------------------|
|                                                              | Yes<br>(n=149, 34.3%)            | No<br>(n=45, 10.3%) | Unsure<br>(n=241, 55.4%) |
| Earache or discharge: 64<br>(15%)                            | 28 (43.8)                        | 6 (9.4)             | 30 (46.9)                |
| Complaints of nose/sinuses: 105<br>(24%)                     | 35 (33.3)                        | 10 (9.5)            | 60 (57.1)                |
| Common cold: 114<br>(26%)                                    | 43 (37.7)                        | 8 (7.0)             | 63 (55.3)                |
| Throat Ache: 202<br>(46%)                                    | 79 (39.1)                        | 12 (5.9)            | 111 (55.0)               |
| Cough: 314<br>(72%)                                          | 100 (31.8)                       | 31 (9.9)            | 183 (58.3)               |
| Other: 169<br>(39%)                                          | 44 (26.0)                        | 25 (14.8)           | 100 (59.2)               |
| Count (%) presented.                                         |                                  |                     |                          |
| * Represents those who presented with symptom (yes response) |                                  |                     |                          |

281

282 **DISCUSSION**

283 Our finding that only 34% of those attending an out of hours centre with ARTI symptoms  
 284 expected to be prescribed antibiotics prior to seeing the doctor is clinically relevant. The  
 285 international literature over the last 20 years indicates that patient expectation for antibiotics  
 286 for management of ARTI varies from 10% [47] to 74% [65]. In our study, patient expectation

1  
2  
3 287 for antibiotic treatment ranks third lowest in this literature, and second lowest among studies  
4  
5 288 published in the last 10 years. In a qualitative study, Dempsey et al reported a recent decrease  
6  
7 289 in demand for antibiotics for acute bronchitis [58], however continued significant demand for  
8  
9 290 antibiotics for ARTI is evident. This is illustrated in Supplementary Material: Table D.

10  
11  
12 291 The statistically significant difference in expecting an antibiotic for gender and age whereby  
13  
14 292 males were less likely to expect an antibiotic than females and older people (56+) are more  
15  
16 293 likely to be 'unsure' whether they will need antibiotics or not (70%) may be helpful to the  
17  
18 294 PCP in communicating with the patient regarding the risk/benefit balance of antibiotic  
19  
20 295 treatment for ARTI. The fact that there was no association found between nearly all  
21  
22 296 symptoms (except throat ache), and antibiotic expectation is also important in helping inform  
23  
24 297 the doctor's assessment of the likelihood of patient expectation for antibiotics. Also the  
25  
26 298 finding of no difference between those who are entitled to free care (medical card holders)  
27  
28 299 and those who aren't, in their expectations of receiving antibiotics indicates that economic  
29  
30 300 factors (whether or not the patient is paying for the consultation) are not of major importance  
31  
32 301 in antibiotic expectation.

33  
34  
35  
36 302 GPs and other primary care doctors are more likely to prescribe antibiotics to patients who  
37  
38 303 expect them or whom they believe expect them [45-59]. It has been suggested that 'patient  
39  
40 304 expectations' is an all-encompassing phrase that includes other reasons such as limited time,  
41  
42 305 poor doctor-patient communication and diagnostic uncertainty [45]. Therefore knowing that  
43  
44 306 only 34% of patients attending an OOH service expect an antibiotic for their ARTI symptoms  
45  
46 307 and that this expectation is not associated with eligibility for free care helps in the clinical  
47  
48 308 decision making process and allows doctors to concentrate more on the medical need.

49  
50  
51  
52 309 Doctors may overestimate the pressure to prescribe antibiotics for acute cough [60-62] or  
53  
54 310 other acute respiratory illnesses [54], often prescribing antibiotics for patients who did not

1  
2  
3 311 request them [63]. Wong et al studying a Chinese primary care population presenting with  
4  
5 312 ARTI symptoms, found that concern about illness severity and obtaining a prescription for  
6  
7 313 symptomatic medications, rather than obtaining a prescription for antibiotics, were the main  
8  
9 314 reasons for patients consulting [47]. Ong et al found, in a study of patients attending an  
10  
11 315 emergency department with ARTI symptoms, that doctors were only able to identify 1 in 4 of  
12  
13 316 those patients who expected antibiotic treatment for their symptoms [54]. The same study  
14  
15 317 also found that patient satisfaction was not related to receipt of antibiotics but was related to  
16  
17 318 the belief they had a better understanding of their illness [54].

19  
20  
21 319 There is some evidence that patients are less satisfied in general practices that have frugal  
22  
23 320 antibiotic prescribing practices in general [66]. However this retrospective study from  
24  
25 321 England with a 36% response rate did not estimate the effect of communication skills. It  
26  
27 322 could be argued that with enhanced communication skills and with the primary care provider  
28  
29 323 (PCP) eliciting and addressing the patients concerns, the satisfaction rating for frugal  
30  
31 324 prescribers would be considerably higher.

32  
33  
34 325 Several studies have shown that private patients who pay for their consultations [47, 67 - 68],  
35  
36 326 as well as those of lower socioeconomic status [51, 69-72] are more likely to be prescribed  
37  
38 327 antibiotics for ARTI. Our study showed an association between having free access to the  
39  
40 328 OOH doctor and absence of expectation for receiving an antibiotic for their ARTI because  
41  
42 329 this eligibility was either due to age (under 6 and over 70 years of age) or income, it is  
43  
44 330 difficult to draw direct conclusions. However, most importantly and in contrast to earlier  
45  
46 331 studies [51, 69 -72], patient expectation for antibiotics was found to be unrelated to having  
47  
48 332 access to free care

49  
50  
51  
52 333 In a study of non-medical practitioners (NMPs), Courtenay et al found reduced levels of  
53  
54 334 satisfaction among patients who expected but did not receive an antibiotic [44]. This figure

1  
2  
3 335 indicates that although NMPs appear to have strategies for managing ARTI consultations,  
4  
5 336 there is still scope for improvement and these prescribers are therefore an important group to  
6  
7 337 involve in antimicrobial stewardship [44]. Antimicrobial stewardship programs should  
8  
9 338 continue to expand in the outpatient setting and should emphasize the importance of clear and  
10  
11 339 direct communication between patients and physicians [59, 73]. Patients from our study  
12  
13 340 anticipated further examination, information and symptomatic treatment. These findings  
14  
15 341 closely echo those of recent studies [44, 47, 54]. It is important to continue with public health  
16  
17 342 campaigns to educate the public on the ineffectiveness of antibiotics in treatment of ARTI,  
18  
19 343 which has been shown to reduce public expectation for antibiotics in such cases [74].  
20  
21  
22  
23

24 345 Our sample represent 3.8% of the total number of consultations for ARTI at the OOH  
25  
26 346 facility' from October 2017-February 2018. All patients had ARTI symptoms. The overall  
27  
28 347 age and gender profile of those attending at the OOH facility with ARTI symptoms are very  
29  
30 348 similar to those investigated in this study (see tables A and B in Supplementary Material),  
31  
32 349 suggesting that our results are representative of those attending at the OOH facility during the  
33  
34 350 study period. However, the proportion of those surveyed who were eligible for free care  
35  
36 351 differed considerably to the overall proportion of those attending at the OOH facility with  
37  
38 352 ARTI during the study period (56% compared to 74%). However it can also be argued that  
39  
40 353 people who decide that their illness is severe enough that they need to see a strange GP in an  
41  
42 354 out of hours service in the evening or late at night and pay at least €55 as a fee for doing so  
43  
44 355 have a much greater motivation for getting an antibiotic prescription. Any other medication  
45  
46 356 that they receive from the GP (e.g. analgesia, cough bottles and antipyretics) does not require  
47  
48 357 a prescription. The fact that 2/3 of respondents were unsure of whether they expected to  
49  
50 358 receive an antibiotic or did not expect to receive one is indicative that the message on AMR  
51  
52  
53  
54  
55  
56  
57  
58  
59  
60

1  
2  
3 359 and the overuse of antibiotics has reached the mind set of those attending an out of hours  
4  
5 360 centre.  
6  
7 361 It is difficult to explain why over 50% of respondents had previously consulted for this  
8  
9 362 particular complaint. We did not ask when this previous consultation had taken place. Repeat  
10  
11 363 consultation rates of between 15% and 20% in children with ARTI and between 20% and  
12  
13 364 30% in adults with lower respiratory tract infections (LRTIs) have been described [75].  
14  
15 365 Between a half and two thirds of adults with LRTI who re-consult are prescribed antibiotics,  
16  
17 366 despite little evidence of an infection requiring antibiotics [75].  
18  
19  
20  
21

## 22 368 **Strengths and Limitations**

23  
24  
25 369 Patients or guardians filled in the questionnaire before the consultation in the waiting room.  
26  
27 370 The fact that the questionnaire was anonymous and short meant that respondents were more  
28  
29 371 likely to be honest in their opinion. The age and gender profile of our sample is very similar  
30  
31 372 to that of the population attending during the study period with ARTI symptoms. People were  
32  
33 373 specifically asked about the nature of their complaints, ensuring that only those with ARTI  
34  
35 374 symptoms were surveyed. The higher number of private patient respondents helped to ensure  
36  
37 375 that the finding that they do not expect antibiotics is reliable, because this bigger number is  
38  
39 376 more likely to contain a spectrum of those who have different views on antibiotic prescription  
40  
41 377 for their ARTI.  
42  
43  
44  
45 378 Our study surveyed people attending only one OOH service. It is possible that those who  
46  
47 379 refused to participate in the survey were more severely ill than those who did and were more  
48  
49 380 likely to look for antibiotics (approximately 5% of those requested, refused to participate).  
50  
51 381 Also while every effort was made to ensure that this was a representative sample of those  
52  
53 382 attending with ARTI, it is possible that the results were skewed as those eligible for free care  
54  
55  
56  
57  
58  
59  
60

1  
2  
3 383 was slightly lower than the centres overall population. However the age and gender profile  
4  
5 384 was similar to the general attendees over the study period.  
6  
7

8 385

## 9 10 386 **CONCLUSIONS**

11  
12  
13 387 A large proportion of those attending out of hours GP service do not have fixed ideas  
14  
15 388 regarding antibiotics and are seeking further assessment, information and reassurance. Most  
16  
17 389 seem to be amenable to not receiving an antibiotic for their illness if their underlying needs  
18  
19 390 are met. This group includes patients eligible for free care as well as those paying for their  
20  
21 391 consultation. Communication and clinical skills of healthcare professionals need to be  
22  
23 392 optimised to ensure reduction in antibiotic prescribing.  
24  
25  
26

27 393

## 28 29 30 394 **Recommendations for Further Research**

31  
32 395 The high number of repeat attendances for ARTI requires further study. A qualitative study  
33  
34 396 of patients attending OOH setting to elicit what their intentions are for attending and their  
35  
36 397 understanding of AMR is also appropriate.  
37  
38

39 398

## 40 41 399 **Abbreviations**

42  
43 400 AMR: antimicrobial or antibiotic resistance; ARTI: acute respiratory tract infection; URTI:  
44  
45 401 upper respiratory tract infection; OOH: out of hours; HCP: healthcare professional; GPs:  
46  
47 402 general practitioners; Further Exam: further examination; Info: Information; LRTIs: lower  
48  
49 403 respiratory tract infections  
50  
51

## 52 404 **DECLARATIONS**

## 53 54 55 405 **Ethical approval and consent to participate**

1  
2  
3 406 Ethical approval for the study was granted by the Health Service Executive Mid-West  
4  
5 407 Research Ethics Committee.  
6

7  
8 408 **Consent for publication**  
9

10 409 Not applicable  
11  
12

13 410 **Availability of data and materials**  
14  
15

16 411 The datasets generated and/or analysed during the current study are not publically available  
17  
18 412 due to variables that could identify GPs through name of practice and location but are  
19  
20 413 available from the corresponding author on reasonable request.  
21  
22

23 414 **Competing Interests**  
24  
25

26 415 The authors declare they have no competing interests.  
27  
28

29 416 **Funding**  
30  
31

32 417 This research was part funded by the Irish College of General Practitioners Research and  
33  
34 418 Education Foundation.  
35

36 419 **Authors Contributions**  
37  
38

39 420 ROC conceived the study. AOR, JOD, CMcM and ROC were involved in the design of the  
40  
41 421 study. ROC and CMcM collected the data. JOD and ROC inputted the data. AON carried out  
42  
43 422 statistical analysis. ROC, CD, AOR and JOD wrote the first draft of the paper. All authors  
44  
45 423 made critical comments on all drafts of the paper, as well as read and approved the final  
46  
47 424 manuscript.  
48  
49

50  
51 425  
52

53 426 **Acknowledgements**  
54  
55  
56  
57  
58  
59  
60

1  
2  
3 427 Professor Ailish Hannigan, Professor of Biostatistics University of Limerick Graduate Entry  
4  
5 428 Medical School, for help with study design and analysis. Mike Finucane and Deirdre Walsh,  
6  
7 429 'Shannondoc' head office, Shelbourne Rd., Limerick City. Noeleen Lyons, Maura O'Regan,  
8  
9 430 Paul Gallagher from 'Shannondoc' Dooradoyle treatment centre, Limerick City.  
10  
11  
12 431

## 13 432 REFERENCES

- 14  
15  
16 433 1. Aryee A, Price N. Antimicrobial stewardship - can we afford to do without it? British  
17  
18 434 journal of clinical pharmacology 2015;**79**(2):173-81 doi:  
19  
20 435 10.1111/bcp.12417[published Online First: Epub Date]].  
21  
22 436 2. Bell BG, Schellevis F, Stobberingh E, et al. A systematic review and meta-analysis of the  
23  
24 437 effects of antibiotic consumption on antibiotic resistance. BMC infectious diseases  
25  
26 438 2014;**14**:13 doi: 10.1186/1471-2334-14-13[published Online First: Epub Date]].  
27  
28  
29 439 3. Power RF, Linnane B, Martin R, et al. The first reported case of Burkholderia contaminans  
30  
31 440 in patients with cystic fibrosis in Ireland: from the Sargasso Sea to Irish Children.  
32  
33 441 BMC pulmonary medicine 2016;**16**(1):57 doi: 10.1186/s12890-016-0219-z[published  
34  
35 442 Online First: Epub Date]].  
36  
37 443 4. O'Connor C, Cormican M, Boo TW, et al. An Irish outbreak of New Delhi metallo-beta-  
38  
39 444 lactamase (NDM)-1 carbapenemase-producing Enterobacteriaceae: increasing but  
40  
41 445 unrecognized prevalence. The Journal of hospital infection 2016;**94**(4):351-57 doi:  
42  
43 446 10.1016/j.jhin.2016.08.005[published Online First: Epub Date]].  
44  
45  
46 447 5. O'Connor C, O'Connell NH, Commane M, et al. Limerick: forever associated with five  
47  
48 448 lines of rhyme or infamous for irrepressible carbapenemase-producing  
49  
50 449 Enterobacteriaceae for all time? The Journal of hospital infection 2016;**93**(2):155-6  
51  
52 450 doi: 10.1016/j.jhin.2016.03.008[published Online First: Epub Date]].  
53  
54  
55 451 6. HPR. Report on Antimicrobial Resistance. Dublin, 2016:1-7.  
56  
57  
58  
59  
60



- 1  
2  
3 452 7. WHO. Antimicrobial resistance: global report on surveillance 2014. Secondary  
4  
5 453 Antimicrobial resistance: global report on surveillance 2014 2017.  
6  
7 454 <http://www.who.int/drugresistance/documents/surveillancereport/en/>.  
8  
9 455 8. Group SHASW, 2009 D. Guidelines for Antimicrobial Stewardship in Hospitals in Ireland.  
10  
11 456 Dublin, Ireland, 2009:1-50.  
12  
13 457 9. O NCC. Antibiotic Resistance-Problems, Progress and Prospects. New England Journal of  
14  
15 458 Medicine 2014;**371**(19):1761-63 doi: 10.1056/NEJMp1408040[published Online  
16  
17 459 First: Epub Date]].  
18  
19 460 10. Harbarth S, Balkhy HH, Goossens H, et al. Antimicrobial resistance: one world, one  
20  
21 461 fight! Antimicrobial resistance and infection control 2015;**4**:49 doi: 10.1186/s13756-  
22  
23 462 015-0091-2[published Online First: Epub Date]].  
24  
25 463 11. NICE. Antimicrobial stewardship: systems and processes for effective antimicrobial  
26  
27 464 medicine use. Secondary Antimicrobial stewardship: systems and processes for  
28  
29 465 effective antimicrobial medicine use 2015.  
30  
31 466 <https://www.nice.org.uk/guidance/ng15/chapter/1-Recommendations>.  
32  
33 467 12. NICE. Antimicrobial stewardship: changing risk related behaviours in the general  
34  
35 468 population. Secondary Antimicrobial stewardship: changing risk related behaviours in  
36  
37 469 the general population 2017. [https://www.nice.org.uk/guidance/ng15/chapter/1-](https://www.nice.org.uk/guidance/ng15/chapter/1-Recommendations)  
38  
39 470 [Recommendations](https://www.nice.org.uk/guidance/ng15/chapter/1-Recommendations).  
40  
41 471 13. Lee ML, Cho CY, Hsu CL, et al. Recent trends in antibiotic prescriptions for acute  
42  
43 472 respiratory tract infections in pediatric ambulatory care in Taiwan, 2000-2009: A  
44  
45 473 nationwide population-based study. Journal of microbiology, immunology, and  
46  
47 474 infection = Wei mian yu gan ran za zhi 2016;**49**(4):554-60 doi:  
48  
49 475 10.1016/j.jmii.2014.08.014[published Online First: Epub Date]].  
50  
51  
52  
53  
54  
55  
56  
57  
58  
59  
60

- 1  
2  
3 476 14. Harris AM, Hicks LA, Qaseem A, et al. Appropriate antibiotic use for acute respiratory  
4  
5 477 tract infection in adults: Advice for high-value care from the american college of  
6  
7 478 physicians and the centers for disease control and prevention. *Annals of Internal*  
8  
9 479 *Medicine* 2016;**164**(6):425-34 doi: 10.7326/M15-1840[published Online First: Epub  
10  
11 480 Date]].
- 13 481 15. NICE. Self-limiting respiratory tract infections –antibiotic prescribing overview.  
15  
16 482 Secondary Self-limiting respiratory tract infections –antibiotic prescribing overview  
17  
18 483 2008. <http://pathways.nice.org.uk/pathways/self-limiting-respiratory-tract-infections-->  
19  
20 484 =  
21  
22  
23 485 antibiotic-prescribing.
- 25 486 16. Meropol SB, Localio AR, Metlay JP. Risks and benefits associated with antibiotic use for  
26  
27 487 acute respiratory infections: a cohort study. *Ann Fam Med* 2013;**11**(2):165-72 doi:  
28  
29 488 10.1370/afm.1449[published Online First: Epub Date]].
- 31 489 17. Fahey T, Stocks N, Thomas T. Systematic review of the treatment of upper respiratory  
32  
33 490 tract infection. *Archives of disease in childhood* 1998;**79**(3):225-30
- 35  
36 491 18. Little P, Watson L, Morgan S, et al. Antibiotic prescribing and admissions with major  
37  
38 492 suppurative complications of respiratory tract infections: a data linkage study. *Br J*  
39  
40 493 *Gen Pract* 2002;**52**(476):187-90, 93
- 42 494 19. Butler CC, Hood K, Verheij T, et al. Variation in antibiotic prescribing and its impact on  
43  
44 495 recovery in patients with acute cough in primary care: prospective study in 13  
45  
46 496 countries. *BMJ* 2009;**338** doi: 10.1136/bmj.b2242[published Online First: Epub  
47  
48 497 Date]].
- 51 498 20. Gulliford MC, Moore MV, Little P, et al. Safety of reduced antibiotic prescribing for self  
52  
53 499 limiting respiratory tract infections in primary care: cohort study using electronic  
54  
55  
56  
57  
58  
59  
60

- 1  
2  
3 500 health records. *Bmj* 2016;**354**:i3410 doi: 10.1136/bmj.i3410[published Online First:  
4  
5 501 Epub Date]].
- 6  
7 502 21. Garbutt JM, Banister C, Spitznagel E, et al. Amoxicillin for acute rhinosinusitis: a  
8  
9 503 randomized controlled trial. *Jama* 2012;**307**(7):685-92 doi:  
10 504 10.1001/jama.2012.138[published Online First: Epub Date]].
- 11  
12  
13 505 22. NICE. Acute cough – public expectation of symptom duration differs from published  
14  
15 506 evidence. Secondary Acute cough – public expectation of symptom duration differs  
16  
17 507 from published evidence 2013.  
18  
19 508 <https://www.evidence.nhs.uk/search?q=%27Acute+cough+%E2%80%93+public+exp>  
20  
21  
22 509 [ectation+of+symptom+duration+differs+from+published+evidence%27](https://www.evidence.nhs.uk/search?q=%27Acute+cough+%E2%80%93+public+expectation+of+symptom+duration+differs+from+published+evidence%27).  
23
- 24 510 23. Spinks A, Glasziou PP, Del Mar CB. Antibiotics for sore throat. *Cochrane Database Syst*  
25  
26 511 *Rev* 2013(11):Cd000023 doi: 10.1002/14651858.CD000023.pub4[published Online  
27  
28 512 First: Epub Date]].
- 29  
30  
31 513 24. Little P, Gould C, Williamson I, et al. Reattendance and complications in a randomised  
32  
33 514 trial of prescribing strategies for sore throat: the medicalising effect of prescribing  
34  
35 515 antibiotics. *Bmj* 1997;**315**(7104):350-2
- 36  
37 516 25. Yaeger JP, Temte JL, Hanrahan LP, et al. Roles of Clinician, Patient, and Community  
38  
39 517 Characteristics in the Management of Pediatric Upper Respiratory Tract Infections.  
40  
41 518 *Ann Fam Med* 2015;**13**(6):529-36 doi: 10.1370/afm.1856[published Online First:  
42  
43 519 Epub Date]].
- 44  
45  
46 520 26. Silverman M, Povitz M, Sontrop JM, et al. Antibiotic Prescribing for Nonbacterial Acute  
47  
48 521 Upper Respiratory Infections in Elderly Persons. *Ann Intern Med* 2017;**166**(11):765-  
49  
50 522 74 doi: 10.7326/m16-1131[published Online First: Epub Date]].
- 51  
52  
53 523 27. Schroeck JL, Ruh CA, Sellick JA, Jr., et al. Factors associated with antibiotic misuse in  
54  
55 524 outpatient treatment for upper respiratory tract infections. *Antimicrobial agents and*

- 1  
2  
3 525 chemotherapy 2015;**59**(7):3848-52 doi: 10.1128/aac.00652-15[published Online First:  
4  
5 526 Epub Date]].  
6  
7 527 28. Teng CL. Antibiotic prescribing for upper respiratory tract infections in the Asia-Pacific  
8  
9 528 region: A brief review. *Malaysian Family Physician : the Official Journal of the*  
10  
11 529 *Academy of Family Physicians of Malaysia* 2014;**9**(2):18-25  
12  
13 530 29. Murphy M, Bradley CP, Byrne S. Antibiotic prescribing in primary care, adherence to  
14  
15 531 guidelines and unnecessary prescribing - an Irish perspective. *BMC family practice*  
16  
17 532 2012;**13**:43-43 doi: 10.1186/1471-2296-13-43[published Online First: Epub Date]].  
18  
19 533 30. Rún Sigurðardóttir N, Nielsen ABS, Munck A, et al. Appropriateness of antibiotic  
20  
21 534 prescribing for upper respiratory tract infections in general practice: Comparison  
22  
23 535 between Denmark and Iceland. *Scandinavian journal of primary health care*  
24  
25 536 2015;**33**(4):269-74 doi: 10.3109/02813432.2015.1114349[published Online First:  
26  
27 537 Epub Date]].  
28  
29 538 31. Davis ME, Liu TL. Exploring Patient Awareness and Perceptions of the Appropriate Use  
30  
31 539 of Antibiotics: A Mixed-Methods Study. 2017;**6**(4) doi:  
32  
33 540 10.3390/antibiotics6040023[published Online First: Epub Date]].  
34  
35 541 32. Louise K. Francois Watkins GVS, Alison P. Albert, Rebecca M. Roberts; Lauri A. Hicks,  
36  
37 542 . Knowledge and Attitudes Regarding Antibiotic Use Among Adult Consumers,  
38  
39 543 Adult Hispanic Consumers, and Health Care Providers —  
40  
41 544 United States, 2012–2013. *Morbidity and Mortality Weekly Report (MMWR)*. USA: Centers  
42  
43 545 for Disease Control and Prevention, 2015:767-70.  
44  
45 546 33. England PH. Health matters: antimicrobial resistance. *Secondary Health matters:*  
46  
47 547 antimicrobial resistance 2015. [https://www.gov.uk/government/publications/health-](https://www.gov.uk/government/publications/health-matters-antimicrobial-resistance)  
48  
49 548 [matters-antimicrobial-resistance](https://www.gov.uk/government/publications/health-matters-antimicrobial-resistance).  
50  
51  
52  
53  
54  
55  
56  
57  
58  
59  
60

- 1  
2  
3 549 34. Quality AfHRa. Improving Antibiotic Prescribing for Uncomplicated Acute Respiratory  
4  
5 550 Tract Infections, 2016.  
6  
7 551 35. Lindberg BH, Gjelstad S, Foshaug M, et al. Antibiotic prescribing for acute respiratory  
8  
9 552 tract infections in Norwegian primary care out-of-hours service. *Scandinavian journal*  
10  
11 553 *of primary health care* 2017;**35**(2):178-85 doi:  
12  
13 554 10.1080/02813432.2017.1333301[published Online First: Epub Date]].  
14  
15 555 36. Huibers L, Moth G, Christensen MB, et al. Antibiotic prescribing patterns in out-of-hours  
16  
17 556 primary care: A population-based descriptive study. *Scandinavian journal of primary*  
18  
19 557 *health care* 2014;**32**(4):200-07 doi: 10.3109/02813432.2014.972067[published Online  
20  
21 558 First: Epub Date]].  
22  
23 559 37. Dyrkorn R, Gjelstad S, Espnes KA, et al. Peer academic detailing on use of antibiotics in  
24  
25 560 acute respiratory tract infections. A controlled study in an urban Norwegian out-of-  
26  
27 561 hours service. *Scandinavian journal of primary health care* 2016;**34**(2):180-5 doi:  
28  
29 562 10.3109/02813432.2016.1163035[published Online First: Epub Date]].  
30  
31 563 38. Elshout G, Kool M, Van der Wouden JC, et al. Antibiotic prescription in febrile children:  
32  
33 564 a cohort study during out-of-hours primary care. *Journal of the American Board of*  
34  
35 565 *Family Medicine : JABFM* 2012;**25**(6):810-8 doi:  
36  
37 566 10.3122/jabfm.2012.06.110310[published Online First: Epub Date]].  
38  
39 567 39. Giesen P, Willekens M, Mokkink H, et al. Out-of-hours primary care: development of  
40  
41 568 indicators for prescribing and referring. *International Journal for Quality in Health*  
42  
43 569 *Care* 2007;**19**(5):289-95 doi: 10.1093/intqhc/mzm027[published Online First: Epub  
44  
45 570 Date]].  
46  
47 571 40. Maartje Willekens PG, Erik Plat, Henk Mokkink, Jako Burgers,, Grol R. Quality of after-  
48  
49 572 hours primary care in the Netherlands: adherence to national guidelines. *BMJ Qual*  
50  
51 573 *Saf* 2011;**20**:223-27  
52  
53  
54  
55  
56  
57  
58  
59  
60

- 1  
2  
3 574 41. Hayward GN, Fisher RF, Spence GT, et al. Increase in antibiotic prescriptions in out-of-  
4  
5 575 hours primary care in contrast to in-hours primary care prescriptions: service  
6  
7 576 evaluation in a population of 600 000 patients. *J Antimicrob Chemother*  
8  
9 577 2016;**71**(9):2612-9 doi: 10.1093/jac/dkw189[published Online First: Epub Date]].  
10  
11 578 42. Debets VE, Verheij TJ, van der Velden AW. Antibiotic prescribing during office hours  
12  
13 579 and out-of-hours: a comparison of quality and quantity in primary care in the  
14  
15 580 Netherlands. *Br J Gen Pract* 2017;**67**(656):e178-e86 doi:  
16  
17 581 10.3399/bjgp17X689641[published Online First: Epub Date]].  
18  
19 582 43. Kallestrup P, Bro F. Parents' beliefs and expectations when presenting with a febrile child  
20  
21 583 at an out-of-hours general practice clinic. *The British Journal of General Practice*  
22  
23 584 2003;**53**(486):43-44  
24  
25 585 44. Courtenay M, Rowbotham S, Lim R, et al. Antibiotics for acute respiratory tract  
26  
27 586 infections: a mixed-methods study of patient experiences of non-medical prescriber  
28  
29 587 management. *BMJ Open* 2017;**7**(3):e013515 doi: 10.1136/bmjopen-2016-  
30  
31 588 013515[published Online First: Epub Date]].  
32  
33 589 45. Fletcher-Lartey S, Yee M, Gaarslev C, et al. Why do general practitioners prescribe  
34  
35 590 antibiotics for upper respiratory tract infections to meet patient expectations: a mixed  
36  
37 591 methods study. *BMJ Open* 2016;**6**(10):e012244 doi: 10.1136/bmjopen-2016-  
38  
39 592 012244[published Online First: Epub Date]].  
40  
41 593 46. Md Rezal RS, Hassali MA, Alrasheedy AA, et al. Physicians' knowledge, perceptions and  
42  
43 594 behaviour towards antibiotic prescribing: a systematic review of the literature. *Expert*  
44  
45 595 review of anti-infective therapy 2015;**13**(5):665-80 doi:  
46  
47 596 10.1586/14787210.2015.1025057[published Online First: Epub Date]].  
48  
49 597 47. Wong CK, Liu Z, Butler CC, et al. Help-seeking and antibiotic prescribing for acute  
50  
51 598 cough in a Chinese primary care population: a prospective multicentre observational  
52  
53  
54  
55  
56  
57  
58  
59  
60

- 1  
2  
3 599 study. NPJ primary care respiratory medicine 2016;**26**:15080 doi:  
4  
5 600 10.1038/npjpcrm.2015.80[published Online First: Epub Date]].  
6  
7 601 48. Gambarelli L, Montanari C, Manni A, et al. Antibiotics in viral upper respiratory tract  
8  
9 602 infections *Ricerca e Pratica* 2002;**18**(4):152-56  
10  
11 603 49. Biezen R, Brijnath B, Grando D, et al. Management of respiratory tract infections in  
12  
13 604 young children-A qualitative study of primary care providers' perspectives. NPJ  
14  
15 605 primary care respiratory medicine 2017;**27**(1):15 doi: 10.1038/s41533-017-0018-  
16  
17 606 x[published Online First: Epub Date]].  
18  
19  
20 607 50. Hamm RM, Hicks RJ, Bemben DA. Antibiotics and respiratory infections: are patients  
21  
22 608 more satisfied when expectations are met? *J Fam Pract* 1996;**43**(1):56-62  
23  
24 609 51. Shlomo V, Adi R, Eliezer K. The knowledge and expectations of parents about the role of  
25  
26 610 antibiotic treatment in upper respiratory tract infection--a survey among parents  
27  
28 611 attending the primary physician with their sick child. *BMC family practice* 2003;**4**:20  
29  
30 612 doi: 10.1186/1471-2296-4-20[published Online First: Epub Date]].  
31  
32  
33 613 52. Martin CL, Njike VY, Katz DL. Back-up antibiotic prescriptions could reduce  
34  
35 614 unnecessary antibiotic use in rhinosinusitis. *Journal of clinical epidemiology*  
36  
37 615 2004;**57**(4):429-34 doi: 10.1016/j.jclinepi.2003.09.008[published Online First: Epub  
38  
39 616 Date]].  
40  
41  
42 617 53. Soma M, Slapgard H, Lerberg M, et al. [Patients' expectations of antibiotics for acute  
43  
44 618 respiratory tract infections]. *Tidsskrift for den Norske laegeforening : tidsskrift for*  
45  
46 619 *praktisk medicin, ny raekke* 2005;**125**(15):1994-7  
47  
48 620 54. Ong S, Nakase J, Moran GJ, et al. Antibiotic use for emergency department patients with  
49  
50 621 upper respiratory infections: prescribing practices, patient expectations, and patient  
51  
52 622 satisfaction. *Ann Emerg Med* 2007;**50**(3):213-20 doi:  
53  
54 623 10.1016/j.annemergmed.2007.03.026[published Online First: Epub Date]].  
55  
56  
57  
58  
59  
60

- 1  
2  
3 624 55. Ackerman SL, Gonzales R, Stahl MS, et al. One size does not fit all: evaluating an  
4  
5 625 intervention to reduce antibiotic prescribing for acute bronchitis. BMC Health  
6  
7 626 Services Research 2013;**13**(1):462 doi: 10.1186/1472-6963-13-462[published Online  
8  
9 627 First: Epub Date]].
- 11 628 56. Hardy-Holbrook RA, Svetlana; Chandnani, Vandana; DeWindt, Daisy and Dinh,  
12  
13 629 Kathryn. Antibiotic resistance and prescribing in Australia: Current attitudes and  
14  
15 630 practice of GPs Healthcare Infection 2013;**18**(4):147-51
- 18 631 57. McNulty CA, Nichols T, French DP, et al. Expectations for consultations and antibiotics  
19  
20 632 for respiratory tract infection in primary care: the RTI clinical iceberg. Br J Gen Pract  
21  
22 633 2013;**63**(612):e429-36 doi: 10.3399/bjgp13X669149[published Online First: Epub  
23  
24 634 Date]].
- 26 635 58. Dempsey PP, Businger AC, Whaley LE, et al. Primary care clinicians' perceptions about  
27  
28 636 antibiotic prescribing for acute bronchitis: a qualitative study. BMC family practice  
29  
30 637 2014;**15**:194 doi: 10.1186/s12875-014-0194-5[published Online First: Epub Date]].
- 33 638 59. McKay R, Mah A, Law MR. Systematic Review of Factors Associated with Antibiotic  
34  
35 639 Prescribing for Respiratory Tract Infections. 2016;**60**(7):4106-18 doi:  
36  
37 640 10.1128/aac.00209-16[published Online First: Epub Date]].
- 39 641 60. Welschen I, Kuyvenhoven M, Hoes A, et al. Antibiotics for acute respiratory tract  
40  
41 642 symptoms: patients' expectations, GPs' management and patient satisfaction. Family  
42  
43 643 practice 2004;**21**(3):234-7
- 46 644 61. Altiner A, Knauf A, Moebes J, et al. Acute cough: a qualitative analysis of how GPs  
47  
48 645 manage the consultation when patients explicitly or implicitly expect antibiotic  
49  
50 646 prescriptions. Family practice 2004;**21**(5):500-6 doi:  
51  
52 647 10.1093/fampra/cmh505[published Online First: Epub Date]].



- 1  
2  
3 648 62. Linder JA, Singer DE. Desire for antibiotics and antibiotic prescribing for adults with  
4  
5 649 upper respiratory tract infections. *J Gen Intern Med* 2003;**18**(10):795-801  
6  
7 650 63. Kautz-Freimuth S, Redaelli M, Samel C, et al. Parental views on acute otitis media  
8  
9 651 (AOM) and its therapy in children - results of an exploratory survey in German  
10  
11 652 childcare facilities. *BMC Pediatrics* 2015;**15**:199 doi: 10.1186/s12887-015-0516-  
12  
13 653 3[published Online First: Epub Date]].  
14  
15 654 64. Health Do. Health Service Executive. Secondary Health Service Executive 2018.  
16  
17 655 <https://www.hse.ie/eng/>.  
18  
19 656 65. Panagakou SG, Spyridis N, Papaevangelou V, et al. Antibiotic use for upper respiratory  
20  
21 657 tract infections in children: a cross-sectional survey of knowledge, attitudes, and  
22  
23 658 practices (KAP) of parents in Greece. *BMC Pediatr* 2011;**11**:60 doi: 10.1186/1471-  
24  
25 659 2431-11-60[published Online First: Epub Date]].  
26  
27 660 66. Ashworth M, White P, Jongsma H, et al. Antibiotic prescribing and patient satisfaction in  
28  
29 661 primary care in England: cross-sectional analysis of national patient survey data and  
30  
31 662 prescribing data. *The British Journal of General Practice* 2016;**66**(642):e40-e46 doi:  
32  
33 663 10.3399/bjgp15X688105[published Online First: Epub Date]].  
34  
35 664 67. Murphy M, Byrne S, Bradley CP. Influence of patient payment on antibiotic prescribing  
36  
37 665 in Irish general practice: a cohort study. *Br J Gen Pract* 2011;**61**(590):e549-55 doi:  
38  
39 666 10.3399/bjgp11X593820[published Online First: Epub Date]].  
40  
41 667 68. Ab Rahman N, Teng CL, Sivasampu S. Antibiotic prescribing in public and private  
42  
43 668 practice: a cross-sectional study in primary care clinics in Malaysia. *BMC infectious*  
44  
45 669 *diseases* 2016;**16**:208 doi: 10.1186/s12879-016-1530-2[published Online First: Epub  
46  
47 670 Date]].  
48  
49 671 69. Kumar S, Little P, Britten N. Why do general practitioners prescribe antibiotics for sore  
50  
51 672 throat? Grounded theory interview study. *Bmj* 2003;**326**(7381):138  
52  
53  
54  
55  
56  
57  
58  
59  
60

- 1  
2  
3 673 70. Vaz LE, Kleinman KP, Lakoma MD, et al. Prevalence of Parental Misconceptions About  
4  
5 674 Antibiotic Use. *Pediatrics* 2015;**136**(2):221-31 doi: 10.1542/peds.2015-  
6  
7 675 0883[published Online First: Epub Date]].  
8  
9 676 71. Rousounidis A, Papaevangelou V, Hadjipanayis A, et al. Descriptive study on parents'  
10  
11 677 knowledge, attitudes and practices on antibiotic use and misuse in children with upper  
12  
13 678 respiratory tract infections in Cyprus. *International journal of environmental research*  
14  
15 679 *and public health* 2011;**8**(8):3246-62 doi: 10.3390/ijerph8083246[published Online  
16  
17 680 First: Epub Date]].  
18  
19 681 72. Salazar ML, English TM, Eiland LS. Caregivers' baseline understanding and expectations  
20  
21 682 of antibiotic use for their children. *Clin Pediatr (Phila)* 2012;**51**(7):632-7 doi:  
22  
23 683 10.1177/0009922812439243[published Online First: Epub Date]].  
24  
25 684 73. Little P, Stuart B, Francis NA, et al. Effects of internet-based training on antibiotic  
26  
27 685 prescribing rates for acute respiratory-tract infections: a multinational, cluster,  
28  
29 686 randomised, factorial, controlled trial. *Lancet* 2013;**382** doi: 10.1016/s0140-  
30  
31 687 6736(13)60994-0[published Online First: Epub Date]].  
32  
33 688 74. Chaintarli K, Ingle SM, Bhattacharya A, et al. Impact of a United Kingdom-wide  
34  
35 689 campaign to tackle antimicrobial resistance on self-reported knowledge and behaviour  
36  
37 690 change. *BMC public health* 2016;**16**:393 doi: 10.1186/s12889-016-3057-2[published  
38  
39 691 Online First: Epub Date]].  
40  
41 692 75. Stanton N, Francis NA, Butler CC. Reducing uncertainty in managing respiratory tract  
42  
43 693 infections in primary care. *Br J Gen Pract* 2010;**60**(581):e466-75 doi:  
44  
45 694 10.3399/bjgp10X544104[published Online First: Epub Date]].  
46  
47  
48  
49  
50  
51 695  
52  
53  
54 696  
55  
56  
57  
58  
59  
60

1  
2  
3 697  
4  
5  
6 698  
7  
8 699  
9  
10  
11 700  
12  
13  
14 701  
15  
16  
17 702  
18  
19  
20 703  
21  
22 704  
23  
24  
25 705  
26  
27  
28 706  
29  
30  
31 707  
32  
33 708  
34  
35  
36 709  
37  
38  
39 710  
40  
41  
42 711  
43  
44  
45 712  
46  
47  
48 713  
49  
50 714  
51  
52  
53 715  
54  
55  
56  
57  
58  
59  
60

For peer review only

Figure 1: Patient Overall Expectations

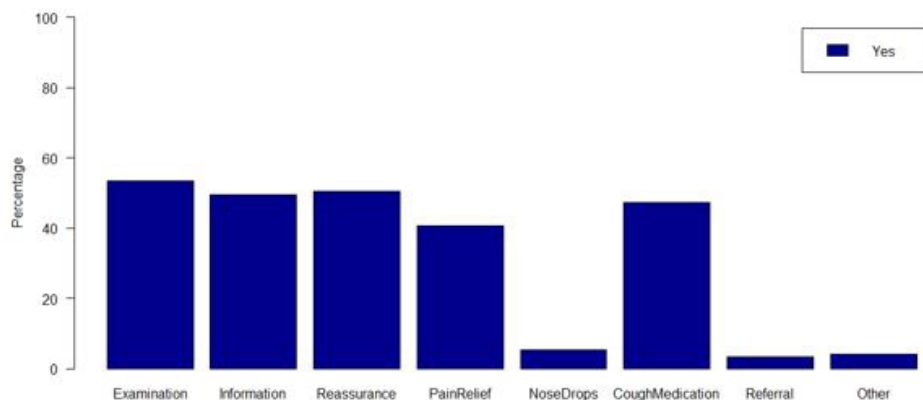

Figure 1: Patient Overall Expectations

162x93mm (96 x 96 DPI)

1  
2  
3 **1 SUPPLEMENTARY MATERIAL: AGE AND GENDER COMPARISON OF OUR**  
4  
5 **2 SAMPLE WITH THOSE ATTENDING SHANNONDOC FACILITY DURING THE**  
6  
7 **3 STUDY PERIOD**  
8  
9  
10  
11  
12  
13

14 **5 Table A: Gender Proportion of those attending OOH Facility with ARTI symptoms**  
15

|                                                     |        | <b>Shannondoc Dooradoyle*</b><br><b>(n=1715)</b> | <b>GEMS</b><br><b>(n=435)</b> |
|-----------------------------------------------------|--------|--------------------------------------------------|-------------------------------|
| Gender                                              | Male   | 783 (39.4)                                       | 176 (40.5)                    |
|                                                     | Female | 1205 (60.1)                                      | 259 (59.5)                    |
| *1988 with resp. complaints<br>Counts (%) presented |        |                                                  |                               |

16  
17  
18  
19  
20  
21  
22  
23  
24  
25  
26  
27  
28  
29  
30  
31 **6 Shannondoc Dooradoyle\*:** This number refers to the population who attended the  
32  
33 **7 ‘Shannondoc’ Dooradoyle out of hours centre, where the study took place, during the study**  
34  
35 **8 period.**  
36  
37  
38  
39  
40

41 **10 Table B: Age of those attending OOH Facility overall during the study period**  
42  
43

| <b>Shannondoc OOH Facility** (n=11,455)</b> |             |             |
|---------------------------------------------|-------------|-------------|
| <b>Age</b>                                  | <b>0-4</b>  | 4706 (41.1) |
|                                             | <b>5-64</b> | 5208 (45.5) |
|                                             | <b>65+</b>  | 1541 (13.4) |
| <b>UL Antibiotic Study (n=435)</b>          |             |             |
| <b>Age</b>                                  | <b>0-6</b>  | 186 (42.7)  |
|                                             | <b>7-55</b> |             |

|                       |            |            |
|-----------------------|------------|------------|
|                       |            | 226 (51.9) |
|                       | <b>56+</b> | 23 (5.3)   |
| Counts (%) presented. |            |            |

11 **Shannondoc OOH Facility\*\***: This number refers to the entire population of patients who  
 12 attended all 'Shannondoc' out of hours centres during the study period.

13

14 **Table C: Eligibility for free care**

|                               |     | <b>Shannondoc OOH Facility<br/>(Total=11,455)</b> | <b>UL Antibiotic Study<br/>(Total=435)</b> |
|-------------------------------|-----|---------------------------------------------------|--------------------------------------------|
| <b>Eligible for Free Care</b> | Yes | 8477 (74)                                         | 244 (56)                                   |
|                               | No  | 2978 (26)                                         | 191 (44)                                   |
| Counts (%) presented          |     |                                                   |                                            |

15

16 **Table D: Patient expectation for antibiotics for ARTI over the last 20 years.**

| <b>Study</b>  | <b>Year</b> | <b>Location</b> | <b>Patient Expectation<br/>For Antibiotic for ARTI</b> |
|---------------|-------------|-----------------|--------------------------------------------------------|
| Hamm          | 1996        | USA             | 65%                                                    |
| Shlomo Vinker | 2003        | Israel          | 25%                                                    |
| Martin        | 2004        | USA             | 76%                                                    |
| Soma          | 2005        | Norway          | 38%                                                    |

1  
2  
3  
4  
5  
6  
7  
8  
9  
10  
11  
12  
13  
14  
15  
16  
17  
18  
19  
20  
21  
22  
23  
24  
25  
26  
27  
28  
29  
30  
31  
32  
33  
34  
35  
36  
37  
38  
39  
40  
41  
42  
43  
44  
45  
46  
47  
48  
49  
50  
51  
52  
53  
54  
55  
56  
57  
58  
59  
60

|               |      |           |     |
|---------------|------|-----------|-----|
| Panagakau     | 2011 | Greece    | 74% |
| McNulty       | 2013 | UK        | 53% |
| Zyoud         | 2015 | Palestine | 73% |
| Wong          | 2017 | China     | 10% |
| UL/Shannondoc | 2018 | Ireland   | 34% |

17

18

For peer review only

## STROBE 2007 (v4) Statement—Checklist of items that should be included in reports of cross-sectional studies

| Section/Topic                | Item # | Recommendation                                                                                                                                                                       | Reported on page # |
|------------------------------|--------|--------------------------------------------------------------------------------------------------------------------------------------------------------------------------------------|--------------------|
| Title and abstract           | 1      | (a) Indicate the study's design with a commonly used term in the title or the abstract                                                                                               | 1                  |
|                              |        | (b) Provide in the abstract an informative and balanced summary of what was done and what was found                                                                                  | 3+4                |
| <b>Introduction</b>          |        |                                                                                                                                                                                      |                    |
| Background/rationale         | 2      | Explain the scientific background and rationale for the investigation being reported                                                                                                 | 5-7                |
| Objectives                   | 3      | State specific objectives, including any prespecified hypotheses                                                                                                                     | 7                  |
| <b>Methods</b>               |        |                                                                                                                                                                                      |                    |
| Study design                 | 4      | Present key elements of study design early in the paper                                                                                                                              | 7                  |
| Setting                      | 5      | Describe the setting, locations, and relevant dates, including periods of recruitment, exposure, follow-up, and data collection                                                      | 7                  |
| Participants                 | 6      | (a) Give the eligibility criteria, and the sources and methods of selection of participants                                                                                          | 8                  |
| Variables                    | 7      | *Clearly define all outcomes, exposures, predictors, potential confounders, and effect modifiers. Give diagnostic criteria, if applicable                                            | 8-9                |
| Data sources/<br>measurement | 8*     | For each variable of interest, give sources of data and details of methods of assessment (measurement). Describe comparability of assessment methods if there is more than one group | 8-9                |
| Bias                         | 9      | Describe any efforts to address potential sources of bias                                                                                                                            | N/A                |
| Study size                   | 10     | Explain how the study size was arrived at                                                                                                                                            | 8                  |
| Quantitative variables       | 11     | Explain how quantitative variables were handled in the analyses. If applicable, describe which groupings were chosen and why                                                         | 9                  |
| Statistical methods          | 12     | (a) Describe all statistical methods, including those used to control for confounding                                                                                                | 9                  |
|                              |        | (b) Describe any methods used to examine subgroups and interactions                                                                                                                  | N/A                |
|                              |        | (c) Explain how missing data were addressed                                                                                                                                          | N/A                |
|                              |        | (d) If applicable, describe analytical methods taking account of sampling strategy                                                                                                   | N/A                |
|                              |        | (e) Describe any sensitivity analyses                                                                                                                                                | N/A                |
| <b>Results</b>               |        |                                                                                                                                                                                      |                    |



|                   |     |                                                                                                                                                                                                                                                                                                                                                                                                               |                       |
|-------------------|-----|---------------------------------------------------------------------------------------------------------------------------------------------------------------------------------------------------------------------------------------------------------------------------------------------------------------------------------------------------------------------------------------------------------------|-----------------------|
| Participants      | 13* | (a) Report numbers of individuals at each stage of study—eg numbers potentially eligible, examined for eligibility, confirmed eligible, included in the study, completing follow-up, and analysed<br>(b) Give reasons for non-participation at each stage<br>(c) Consider use of a flow diagram                                                                                                               | 10                    |
| Descriptive data  | 14* | (a) Give characteristics of study participants (eg demographic, clinical, social) and information on exposures and potential confounders<br>(b) Indicate number of participants with missing data for each variable of interest                                                                                                                                                                               | 10<br>N/A             |
| Outcome data      | 15* | Report numbers of outcome events or summary measures                                                                                                                                                                                                                                                                                                                                                          | N/A<br>11-12          |
| Main results      | 16  | (a) Give unadjusted estimates and, if applicable, confounder-adjusted estimates and their precision (eg, 95% confidence interval). Make clear which confounders were adjusted for and why they were included<br>(b) Report category boundaries when continuous variables were categorized<br>(c) If relevant, consider translating estimates of relative risk into absolute risk for a meaningful time period | 11-12<br>10-14<br>N/A |
| Other analyses    | 17  | Report other analyses done—eg analyses of subgroups and interactions, and sensitivity analyses                                                                                                                                                                                                                                                                                                                | <del>12-14</del>      |
| Discussion        |     |                                                                                                                                                                                                                                                                                                                                                                                                               |                       |
| Key results       | 18  | Summarise key results with reference to study objectives                                                                                                                                                                                                                                                                                                                                                      | 14-18                 |
| Limitations       | 19  | Discuss limitations of the study, taking into account sources of potential bias or imprecision. Discuss both direction and magnitude of any potential bias                                                                                                                                                                                                                                                    | 18                    |
| Interpretation    | 20  | Give a cautious overall interpretation of results considering objectives, limitations, multiplicity of analyses, results from similar studies, and other relevant evidence                                                                                                                                                                                                                                    | 14-18                 |
| Generalisability  | 21  | Discuss the generalisability (external validity) of the study results                                                                                                                                                                                                                                                                                                                                         | 18-19                 |
| Other information |     |                                                                                                                                                                                                                                                                                                                                                                                                               |                       |
| Funding           | 22  | Give the source of funding and the role of the funders for the present study and, if applicable, for the original study on which the present article is based                                                                                                                                                                                                                                                 | 20                    |

\*Give information separately for cases and controls in case-control studies and, if applicable, for exposed and unexposed groups in cohort and cross-sectional studies.

**Note:** An Explanation and Elaboration article discusses each checklist item and gives methodological background and published examples of transparent reporting. The STROBE checklist is best used in conjunction with this article (freely available on the Web sites of PLOS Medicine at <http://www.plosmedicine.org/>, Annals of Internal Medicine at <http://www.annals.org/>, and Epidemiology at <http://www.epidem.com/>). Information on the STROBE Initiative is available at [www.strobe-statement.org](http://www.strobe-statement.org).

1  
2  
3  
4  
5  
6  
7  
8  
9  
10  
11  
12  
13  
14  
15  
16  
17  
18  
19  
20  
21  
22  
23  
24  
25  
26  
27  
28  
29  
30  
31  
32  
33  
34  
35  
36  
37  
38  
39  
40  
41  
42  
43  
44  
45  
46  
47  
48  
49  
50  
51  
52  
53  
54  
55  
56  
57  
58  
59  
60

# BMJ Open

## Medical Management of Acute Upper Respiratory Infections in an Urban Primary Care Out of Hours Facility; Cross Sectional Study of Patient Presentations and Expectations

|                                 |                                                                                                                                                                                                                                                                                                                                                                                                                                                                                                                   |
|---------------------------------|-------------------------------------------------------------------------------------------------------------------------------------------------------------------------------------------------------------------------------------------------------------------------------------------------------------------------------------------------------------------------------------------------------------------------------------------------------------------------------------------------------------------|
| Journal:                        | <i>BMJ Open</i>                                                                                                                                                                                                                                                                                                                                                                                                                                                                                                   |
| Manuscript ID                   | bmjopen-2018-025396.R1                                                                                                                                                                                                                                                                                                                                                                                                                                                                                            |
| Article Type:                   | Research                                                                                                                                                                                                                                                                                                                                                                                                                                                                                                          |
| Date Submitted by the Author:   | 26-Oct-2018                                                                                                                                                                                                                                                                                                                                                                                                                                                                                                       |
| Complete List of Authors:       | O'Connor, Raymond; University of Limerick Faculty of Education and Health Sciences, Graduate Entry Medical School<br>O'Doherty, Jane; University of Limerick Faculty of Education and Health Sciences, Graduate Entry Medical School<br>O'Regan, Andrew; University of Limerick Faculty of Education and Health Sciences, Graduate Entry Medical School<br>O'Neill, Aoife; University of Limerick, Mathematics and Statistics<br>McMahon, Claire; Shannondoc Out of Hours GP Service<br>Dunne, C.; Univ Limerick, |
| <b>Primary Subject Heading</b>: | General practice / Family practice                                                                                                                                                                                                                                                                                                                                                                                                                                                                                |
| Secondary Subject Heading:      | Infectious diseases                                                                                                                                                                                                                                                                                                                                                                                                                                                                                               |
| Keywords:                       | out-of-hours, upper respiratory tract infection, antibacterial agent, patient expectations, antibiotic prescription                                                                                                                                                                                                                                                                                                                                                                                               |
|                                 |                                                                                                                                                                                                                                                                                                                                                                                                                                                                                                                   |

SCHOLARONE™  
Manuscripts

1  
2  
3 **1 Medical Management of Acute Upper Respiratory Infections in an Urban Primary Care**  
4  
5 **2 Out of Hours Facility; Cross Sectional Study of Patient Presentations and Expectations**  
6  
7

8 **3 Authors**  
9

10  
11 4 Raymond O'Connor<sup>1</sup>  
12  
13

14 5 Jane O'Doherty<sup>2</sup>  
15  
16

17 6 Andrew O'Regan<sup>3</sup>  
18  
19

20 7 Aoife O'Neill<sup>4</sup>  
21  
22

23 8 Claire McMahon<sup>5</sup>  
24  
25

26 9 Colum Dunne <sup>6</sup>  
27  
28

29 10  
30  
31

32 <sup>1</sup>Corresponding author: Dr. Raymond O'Connor  
33  
34

35 12 Senior Research Fellow, Graduate Entry Medical School, University of Limerick, Ireland  
36  
37

38 13 Email: [Raymond.OConnor@ul.ie](mailto:Raymond.OConnor@ul.ie)  
39  
40

41 14 Telephone: 061234851  
42  
43

44 15  
45  
46

47 <sup>2</sup>Ms. Jane O'Doherty  
48  
49

50 17 Research Assistant, Graduate Entry Medical School, University of Limerick, Ireland  
51  
52

53 18 Email: [Jane.ODoherty@ul.ie](mailto:Jane.ODoherty@ul.ie)  
54  
55

56 19  
57  
58  
59  
60

1  
2  
3 20 <sup>3</sup>Dr. Andrew O'Regan  
4  
5

6 21 Senior Lecturer in General Practice, Graduate Entry Medical School, University of Limerick,  
7  
8 22 Ireland  
9

10  
11 23 Email: [Andrew.OREgan@ul.ie](mailto:Andrew.OREgan@ul.ie)  
12  
13  
14 24

15  
16  
17 25 <sup>4</sup>Ms Aoife O'Neill  
18

19  
20 26 PhD Candidate, Department of Mathematics and Statistics, University of Limerick, Ireland  
21  
22

23 27 Email: [Aoife.ONeill@ul.ie](mailto:Aoife.ONeill@ul.ie)  
24  
25

26 28

27  
28  
29 29 <sup>5</sup>Claire McMahon  
30

31  
32 30 Clinical Quality Manager,  
33

34 31 Shannondoc Out of Hours General Practice Service, Shelbourne Rd., Limerick Ireland  
35

36 32 Email: [clairemcmahon@shannondoc.ie](mailto:clairemcmahon@shannondoc.ie)  
37  
38

39 33

40  
41 34 Prof. Colum Dunne  
42

43  
44 35 Director of Research (GEMS) & Founding Director of Centre for Interventions in Infection,  
45

46 36 Inflammation & Immunity (41), Graduate Entry Medical School, University of Limerick, Ireland  
47  
48

49 37 Email: [Colum.Dunne@ul.ie](mailto:Colum.Dunne@ul.ie)  
50  
51

52 38  
53

54  
55 39  
56  
57  
58  
59  
60

40

**Abstract**

**Objectives:** The purpose of this study was to examine the expectations of patients attending an urban primary care out of hours facility with acute upper respiratory tract infection (acute URTI) regarding clinical examination, symptom management, information on their condition, reassurance, antibiotic treatment and other possible options including referral

**Design:** Cross-sectional design

**Setting:** One urban primary care out of hours facility located in the Mid-West of Ireland.

**Participants:** 457 patients filled out a questionnaire while waiting in the out of hours facility, 22 surveys were excluded as the patients did not present with symptoms of acute URTI resulting in 435 patients' data being included in this study. There were 59.5% female participants and 40.5% male participants.

**Results:** 435 patients with acute URTI symptoms participated in the survey, representing 25.4% of those attending the single branch where the survey was conducted (n=1715). Of the study participants, 43% were aged under six years and 60% were female. The most common presenting symptoms were cough (72%), throat ache (46%) and common cold (26%). The most common expectations were for further examination (53%), reassurance (51%), information (49%) and medication for cough (47%), with 34% expecting an antibiotic.

**Conclusions:** Only one in three patients attending this primary care OOH facility with acute URTI symptoms had an expectation of antibiotics, with most seeking further assessment,

1  
2  
3 60 information and reassurance. Recognition of such expectations may be important considerations  
4  
5 61 for clinicians when deciding on management options for acute URTI patients.  
6  
7

8 62 **Word Count:** 3680  
9

10  
11 63 **Strengths and limitations of this study.**  
12  
13

- 14 64 • The study used a previously validated questionnaire that was adapted and piloted by a  
15  
16 65 multi-disciplinary research and clinical team.  
17  
18  
19 66 • The research was conducted over four consecutive months which would mitigate the  
20  
21 67 effects of any public health campaigns aimed at reducing antibiotic use at the time.  
22  
23  
24  
25 68 • The higher number of private patient respondents helped to ensure that the finding that  
26  
27 69 they do not expect antibiotics is reliable.  
28  
29  
30 70 • As this is a single centre study, the population studied in this particular OOH service may  
31  
32 71 not reflect those seen in OOH services throughout Ireland and/or the UK  
33  
34  
35 72 • The patient's desire for antibiotics was not assessed against the clinician-assessed need  
36  
37 73 for antibiotics. Severity and duration of the illness was not assessed which may have  
38  
39 74 affected patient expectation for antibiotics.  
40  
41  
42  
43 75  
44  
45 76  
46  
47 77  
48  
49 78  
50  
51  
52 79  
53  
54  
55 80  
56  
57  
58  
59  
60

1  
2  
3 81  
4  
5  
6 82  
7  
8  
9 83  
10  
11  
12 84  
13  
14  
15 85  
16  
17  
18 86  
19  
20  
21 87  
22  
23  
24 88  
25  
26  
27 89  
28  
29  
30 90  
31  
32  
33 91  
34  
35  
36 92  
37  
38  
39 93  
40  
41  
42 94  
43  
44  
45 95  
46  
47  
48 96  
49  
50  
51 97  
52  
53  
54 98  
55  
56  
57  
58  
59  
60

For peer review only

1  
2  
3 99  
4  
56 100  
7  
89 101  
10  
1112 102  
13  
1415 103  
16  
1718 104  
19  
2021 105  
22  
2324 106  
25  
2627 107  
28  
2930 108  
31  
3233 109  
34  
3536 110  
37  
3839 **111 BACKGROUND**  
4041  
42 112 Antimicrobial or antibiotic resistance (AMR) is a growing threat to global public health [1].  
4344 113 Increasing consumption of antibiotics is associated with the development of antibiotic resistance  
4546 114 at individual, community, national and international levels [2-5]. It is estimated that 25,000  
4748 115 people in the EU die annually as a result of infections caused by resistant bacteria, at a societal  
4950  
51 116 cost of approximately €1.5 billion annually [6]. Over the last 30 years, no major new types of  
5253 117 antibiotics have been developed [7]. Therefore, antibiotic stewardship programmes, aiming to  
54  
55  
56  
57  
58  
59  
60



1  
2  
3 118 ensure the judicious use of antimicrobials by preventing their unnecessary use, have been  
4  
5 119 established [1, 8-12].  
6  
7

8 120 Acute upper respiratory tract infection (acute URTI), which incorporates the term “upper  
9  
10 121 respiratory infection” (URTI), describes infections of the upper airways [13]. It is the most  
11  
12 122 common reason for antibiotic prescription in adults [13] and children [14]. These prescriptions  
13  
14 123 are often inappropriate in that they may be unnecessary, lead to increased antibiotic resistance  
15  
16 124 and put patients at risk of adverse events [13]. Typically, inappropriate antibiotic prescribing  
17  
18 125 occurs when a doctor prescribes an antibiotic that is not clinically indicated. The benefits of  
19  
20 126 antibiotics are marginal for the management of most cases of acute URTI [15-22], including sore  
21  
22 127 throat [23, 24]. Internationally, research shows that, with few exceptions [25], inappropriate  
23  
24 128 prescribing of antibiotics for patients with mainly acute URTI is common [26-30]. This is  
25  
26 129 thought to be related to a poor standard of knowledge among the general public regarding the  
27  
28 130 usefulness of antibiotics in acute URTI, with widespread belief, for example, that antibiotics  
29  
30 131 work well for treating viral infections [31, 32].  
31  
32  
33  
34  
35

36 132 It has been reported that 75% of overall antibiotic prescribing takes place in primary care [33].  
37  
38 133 For example, the majority of outpatient antibiotic prescriptions in the USA are for acute URTIs  
39  
40 134 [13, 34]. In Ireland, the UK and many other countries, out of hours (OOH) services are an  
41  
42 135 integral part of primary care provision, providing primary care outside of ‘core’ contracted hours  
43  
44 136 during weekday evenings and nights and on weekends or bank holidays. This care is usually for  
45  
46 137 clinical cases that are deemed to be of sufficiently urgent nature that they cannot wait until the  
47  
48 138 next available routine consulting period. Internationally, acute URTIs are estimated to constitute  
49  
50 139 9% of the consultations in general practice, while the corresponding proportion in the OOH  
51  
52  
53  
54  
55  
56  
57  
58  
59  
60

1  
2  
3 140 service is 16.7% [35]. Hence, this service handles a substantial proportion of acute URTIs and is,  
4  
5 141 thereby, potentially an important contributor to overall antibiotic consumption.  
6  
7

8 142 Patterns of antibiotic prescribing that clearly do not adhere to guidelines have been reported [36,  
9  
10 143 37]. In some regions, this has contributed to a 25% rate of antibiotic prescribing for children with  
11  
12 144 fever in an OOH setting [38]. Giesen described how national clinical guidelines are not suited to  
13  
14 145 the context of the OOH setting leading to clinical uncertainty for doctors [39]. This has resulted  
15  
16 146 in quality of antibiotic prescribing being less than optimal [40]. Trends in prescribing have also  
17  
18 147 suggested that there may be a partial displacement of antibiotic prescribing from in-hours to the  
19  
20 148 OOH setting, where patients with acute infective symptoms seeking antibiotics present to the  
21  
22 149 OOH service after refusal by the in-hours general practice [41]. In contrast, other studies have  
23  
24 150 shown antibiotic prescription rates to be similar in the OOH setting compared with the daytime  
25  
26 151 in-hours setting [35, 42].  
27  
28  
29  
30  
31

32 152  
33  
34  
35 153 While it is true that poor public understanding of the usefulness of antibiotics in acute URTI may  
36  
37 154 increase patient expectation for antibiotic prescription, there is evidence that clinical examination  
38  
39 155 and explanation of the diagnosis is important to patients' satisfaction with the consultation [43].  
40  
41 156 It has also been shown that taking a patient's concerns seriously, conducting a physical  
42  
43 157 examination, communicating a treatment plan and explaining treatment decisions all increase  
44  
45 158 patient satisfaction with the management of acute URTI [44].  
46  
47  
48

49 159 One of the most important factors influencing doctors prescribing of antibiotics for acute URTI  
50  
51 160 is patient expectation [45-59]. However, doctors often overestimate the level of this expectation  
52  
53 161 [54, 60-63].  
54  
55  
56  
57  
58  
59  
60

1  
2  
3 162 Hence, there is an important need to determine what patients presenting to an OOH centre with  
4  
5 163 acute URTI symptoms are expecting from their consultation with the healthcare professional  
6  
7 164 (HCP). The purpose of this study was to examine patients' expectations of clinical examination,  
8  
9 165 symptom management, information on their condition, reassurance, antibiotic treatment and  
10  
11 166 other possible options including referral. This insight into patient expectation will inform HCPs  
12  
13 167 dealing with patients presenting with acute URTI in an OOH setting.  
14  
15  
16  
17  
18  
19

## 20 169 **METHODS**

### 21 170 **Study Setting**

22  
23  
24  
25  
26 171 The 'Shannondoc' primary care OOH facility (hereinafter referred to as 'the OOH facility') in  
27  
28 172 Limerick City, in the Mid-West of Ireland is the regional primary care setting for treating  
29  
30 173 patients between the hours of 6 pm to 8 am on weekdays and at all hours over weekends. The  
31  
32 174 OOH facility has 12 branches throughout the region. It has a mixed private-public system with  
33  
34 175 45% of the population eligible for free care under a means-tested General Medical Services  
35  
36 176 (GMS) card or doctor visit only card which is issued by the Irish Health Service Executive [64].  
37  
38 177 Eligibility criteria for free medical care include: age under six or over 70 years; or earning below  
39  
40 178 a certain figure based on family size. This group is hereinafter referred to as those eligible for  
41  
42 179 free care. GPs (general practitioners) (who are self-employed) are paid a 'per capita' fee by the  
43  
44 180 state for their care. These patients do not pay directly for GP consultations whereas patients  
45  
46 181 without a card pay an average of €55 per consultation.  
47  
48  
49  
50

### 51 182 **Participants**

52  
53  
54  
55  
56  
57  
58  
59  
60

1  
2  
3 183 Each day reception staff distributed the paper-based questionnaires along with information and  
4  
5 184 consent forms to patients in the waiting room, prior to their consultation. The trained reception  
6  
7  
8 185 staff are experienced at working in a supervised clinical setting out of hours. Only patients  
9  
10 186 attending with symptoms of acute URTI were invited to participate in the study. For those aged  
11  
12 187 under 18 years, parents or guardians were asked to complete the questionnaire. Reception staff  
13  
14 188 were briefed by a member of the research team (ROC) on the aims of the study and given a list  
15  
16 189 of acute URTI symptoms. All questionnaires were completed at the OOH facility. Completed  
17  
18 190 forms were securely stored in the University of Limerick Graduate Entry Medical School  
19  
20  
21 191 building.

22  
23  
24  
25 192

### 26 27 193 **Sample Size**

28  
29  
30 194 It was calculated that a random sample of 400 patients would be required to estimate the  
31  
32 195 percentage of patients expecting a prescription for antibiotics with 95% confidence and a margin  
33  
34 196 of error of 5%. While our sample is not randomly selected, this sample size calculation was used  
35  
36 197 to guide recruitment.

### 37 38 39 40 198 **Measures**

41  
42  
43 199 The questionnaire used was adapted from an instrument used by a recent study of patient  
44  
45 200 experiences of antibiotic prescribing by non-medical practitioners [44]. The modifications made  
46  
47 201 to the original instrument were: eliminating the post consultation element which asked patients  
48  
49 202 what treatment they were given and ranking their satisfaction with various aspects of the  
50  
51 203 consultation. All patients provided information regarding their age, gender, eligibility for free  
52  
53  
54  
55  
56  
57  
58  
59  
60

204 care and whether this was their first consultation with their GP or the OOH facility for the  
205 current complaint.

206 Other data collected included:

- 207 • Expecting antibiotics: Yes, no, unsure
- 208 • Reasons for seeing the GP: Earache or ear discharge, complaints of nose/sinuses,  
209 common cold, throat ache, cough, other reasons e.g. flu like symptoms
- 210 • What did they expect to receive from the GP: Further examination, information,  
211 reassurance, medication for pain relief, nose drops, medication for cough, referral to hospital or  
212 specialist, other

213 The modified questionnaire was piloted among non-medical staff and students in the medical  
214 school who were not associated with the study to ensure face validity (see appendix 1).

215 Completed questionnaires were de-identified for storage where patients had entered identifying  
216 data on the questionnaire during its completion.

217

## 218 **Data analysis**

219 Descriptive statistics were used to explore the demographic profile, patient symptoms and patient  
220 expectations. Variables were summarized using graphical and numeric descriptive statistics.

221 Categorical variables were described using counts and percentages. The demographic  
222 characteristics of the sample and known characteristics of the population attending the OOH  
223 facility with acute URTI symptoms were compared. The percentage of the sample with an  
224 expectation of antibiotics was calculated with a 95% confidence interval. The Pearson's chi-

1  
2  
3 225 squared test was used to investigate associations between categorical variables. SPSS Version 24  
4  
5 226 and R software were used for the statistical analysis. Ethical approval for the study was granted  
6  
7 227 by the Health Service Executive Mid-West Research Ethics Committee reference number  
8  
9  
10 228 068/17.

11  
12  
13 229

### 16 230 **Patient and Public Involvement**

17  
18  
19 231 Patients were not involved in the design of the study. Patient data was collected but no  
20  
21 232 identifying data was included in this study. Patients were recruited by staff at the out of hours  
22  
23 233 service based on their physical symptoms of acute URTI. Patients will be able to view the results  
24  
25 234 of this study when it is published in a peer reviewed journal.

26  
27  
28  
29 235

## 31 236 **RESULTS**

### 34 237 **Patient characteristics**

35  
36  
37  
38 238 A total of 457 questionnaires were collected during the time period of the study. When reviewing  
39  
40 239 the data, 22 questionnaires were excluded as patients presented with non-acute URTI symptoms.  
41  
42 240 This yielded a total of 435 questionnaires related to patients with symptoms of acute URTI. This  
43  
44 241 sample represents one in four of the 1715 patients with acute URTI who attended this treatment  
45  
46 242 centre from October 2017-February 2018 and 3.8% of the 11,455 face-to-face consultations for  
47  
48 243 acute URTI at all treatment centres of the OOH service in the region during the same period.  
49  
50 244 Patient characteristics and pre-consultation expectation for antibiotic treatment are summarised  
51  
52  
53 245 in Table 1.

246 The majority of the sample was female (60%) and over half (56%) were eligible for free care.

247 The most common age group was under six years of age (43%). Two hundred and twenty one

248 respondents (50.8%) indicated that this was not their first consultation for this illness. The

249 demographic characteristics of the sample and known characteristics of the population attending

250 the OOH facility with acute URTI symptoms are presented in Supplementary Material (Tables

251 A, B and C). Compared to the demographic characteristics of the population attending the OOH

252 facility with acute URTI, patients who were eligible for free care were under-represented in the

253 sample (56% vs 74%). The age and gender profile of our sample compared to the OOH facility

254 was similar (see Supplementary Material; Tables A, B and C). Older people (over the age of 56

255 years) are poorly represented in our sample, making up only 5.3% of the population studied.

257 Table 1: Patient characteristics and pre-consultation expectations of antibiotics (n=435)

| <b>Patient Characteristics and pre-consultation antibiotic expectations</b> | <b>n (%)</b> |
|-----------------------------------------------------------------------------|--------------|
| <b>Gender</b>                                                               |              |
| Male                                                                        | 176 (40.5)   |
| Female                                                                      | 259 (59.5)   |
| <b>Age (Years)</b>                                                          |              |
| Under 6                                                                     | 186 (42.8)   |
| 6-25                                                                        | 130 (29.9)   |
| 25-55                                                                       | 96 (22.1)    |
| 56+                                                                         | 23 (5.3)     |

|                                                      |            |
|------------------------------------------------------|------------|
| <b>Eligibility for Free Care</b>                     |            |
| Yes                                                  | 244 (56.1) |
| No                                                   | 191 (43.9) |
| <b>First medical consultation for this complaint</b> |            |
| Yes                                                  | 214 (49.2) |
| No                                                   | 221 (50.8) |
| <b>Expecting Antibiotics Pre Consultation</b>        |            |
| Yes                                                  | 149 (34.3) |
| No                                                   | 45 (10.3)  |
| Unsure                                               | 241 (55.4) |

258

### 259 **Presenting Symptoms**

260 Patients presented with varying symptoms; many of them reported multiple symptoms. Cough  
 261 was the most common (72%), followed by throat ache (46%). The least common symptoms  
 262 included earache or discharge (15%) and complaints of nose/sinuses (24.1%). These symptoms  
 263 are displayed in Table 2.

264

### 265 **Patient Expectations**

266 Patient expectations for each symptom are illustrated in figure 1 and described in table 2. Table 2  
 267 also gives the overall expectation for each potential response of the HCP. The most commonly  
 268 expressed expectations were for further examination (53%), reassurance (51%), information  
 269 (49%) and medication for cough (47%). Patients least expected to receive nose drops (5%) or a



270 referral to hospital or specialist (3%). Thirty four percent (95% CI = 30%, 39%) of patients  
 271 expected to receive an antibiotic, 10% (95% CI = 8%, 14%) did not expect to receive and  
 272 antibiotic and the majority (55%, 95% CI = 50%, 60%) were unsure whether they would need an  
 273 antibiotic or not (Table 1). There was no association found between expectation of antibiotics  
 274 and eligibility for free care (Pearson's Chi-Squared test,  $p=0.22$ ). Also using Pearson's test, there  
 275 was a statistically significant difference in expecting an antibiotic for gender and age in that  
 276 males were less likely to expect an antibiotic than females ( $p=0.008$ ) and older people (aged 56  
 277 and over) were more likely to be 'unsure' whether they needed antibiotics or not ( $p=0.026$ ).

278

279 Figure 1: Patient Overall Expectations

280

### 281 **Differences between patient expectation, expecting an antibiotic and symptom presented**

282 Patient expectations for each symptom are described in Table 2. For each symptom presented,  
 283 patient expectations of further examination, information or reassurance were similar, with  
 284 approximately half those who presented with each symptom reporting an expectation to receive  
 285 these treatments. A large proportion of patients presenting with symptoms of an earache (67%)  
 286 or cough (65%) reported expecting to receive pain relief. A large proportion of patients  
 287 presenting with sinusitis (60%) or cough (62%) symptoms reported expecting to receive cough  
 288 medication.

289 Table 2: Patient expectations for each symptom

| Symptom* | Patient Expectation |
|----------|---------------------|
|----------|---------------------|

|                                                                                                         | <b>Further Exam</b> | <b>Info</b>   | <b>Reassure</b> | <b>Pain relief</b> | <b>Nose Drops</b> | <b>Cough Medicine</b> | <b>Referral</b> |
|---------------------------------------------------------------------------------------------------------|---------------------|---------------|-----------------|--------------------|-------------------|-----------------------|-----------------|
| Earache<br>(n=64, 14.7%)                                                                                | 39<br>(60.9)        | 34<br>(53.1)  | 30<br>(46.9)    | 43<br>(67.2)       | 6<br>(9.4)        | 23<br>(35.9)          | 0<br>(0.0)      |
| Sinuses<br>(n=105, 24.1%)                                                                               | 53<br>(50.5)        | 56<br>(53.3)  | 53<br>(50.5)    | 47<br>(44.8)       | 14<br>(13.3)      | 63<br>(60.0)          | 5<br>(4.8)      |
| Common cold<br>(n=114, 26.2%)                                                                           | 64<br>(56.1)        | 54<br>(47.4)  | 62<br>(54.4)    | 53<br>(46.5)       | 10<br>(8.8)       | 64<br>(56.1)          | 5<br>(4.4)      |
| Throat Ache<br>(n=202, 46.4%)                                                                           | 104<br>(51.5)       | 99<br>(49.0)  | 96<br>(47.5)    | 115<br>(56.9)      | 13<br>(6.4)       | 101<br>(50.0)         | 8<br>(4.0)      |
| Cough<br>(n=314, 72.2%)                                                                                 | 164<br>(52.2)       | 159<br>(50.6) | 161<br>(51.3)   | 109<br>(34.7)      | 19<br>(6.1)       | 195<br>(62.1)         | 12<br>(3.8)     |
| Other<br>(n=169, 38.9%)                                                                                 | 104<br>(61.5)       | 99<br>(58.6)  | 119<br>(70.4)   | 59<br>(34.9)       | 9<br>(5.3)        | 64<br>(37.9)          | 8<br>(4.7)      |
| <b>Overall expectation**</b>                                                                            | <b>528</b>          | <b>501</b>    | <b>521</b>      | <b>426</b>         | <b>71</b>         | <b>510</b>            | <b>38</b>       |
| Counts (%) presented.                                                                                   |                     |               |                 |                    |                   |                       |                 |
| *Represents those who presented with symptom (yes response)                                             |                     |               |                 |                    |                   |                       |                 |
| ** As many patients presented with multiple symptoms, the count exceeds the number of patients surveyed |                     |               |                 |                    |                   |                       |                 |

290

291 Table 3 presents differences in antibiotic expectations. Patients presenting with symptoms of an  
 292 earache (44%) or throat ache (39%) were most likely to expect antibiotics. The majority of  
 293 patients across all symptoms were 'unsure' whether they would require antibiotics.

294 Table 3: Antibiotic expectations of those presenting with different symptoms

| Symptoms*                                                    | Patients expecting an antibiotic |                     |                          |
|--------------------------------------------------------------|----------------------------------|---------------------|--------------------------|
|                                                              | Yes<br>(n=149, 34.3%)            | No<br>(n=45, 10.3%) | Unsure<br>(n=241, 55.4%) |
| Earache or discharge: 64<br>(15%)                            | 28 (43.8)                        | 6 (9.4)             | 30 (46.9)                |
| Complaints of nose/sinuses: 105<br>(24%)                     | 35 (33.3)                        | 10 (9.5)            | 60 (57.1)                |
| Common cold: 114<br>(26%)                                    | 43 (37.7)                        | 8 (7.0)             | 63 (55.3)                |
| Throat Ache: 202<br>(46%)                                    | 79 (39.1)                        | 12 (5.9)            | 111 (55.0)               |
| Cough: 314<br>(72%)                                          | 100 (31.8)                       | 31 (9.9)            | 183 (58.3)               |
| Other: 169<br>(39%)                                          | 44 (26.0)                        | 25 (14.8)           | 100 (59.2)               |
| Count (%) presented.                                         |                                  |                     |                          |
| * Represents those who presented with symptom (yes response) |                                  |                     |                          |

295

1  
2  
3 296 **DISCUSSION**  
4  
5

6 297 Our finding that 34% of those attending an out of hours centre with acute URTI symptoms  
7  
8 298 expected to be prescribed antibiotics prior to seeing the doctor is clinically relevant. The  
9  
10 299 international literature over the last 20 years indicates that patient expectation for antibiotics for  
11  
12 300 management of acute URTI varies from 10% (47) to 74% [65]. In our study, patient expectation  
13  
14 301 for antibiotic treatment ranks third lowest in this literature and second lowest among studies  
15  
16 302 published in the last 10 years. In a qualitative study, Dempsey et al reported a recent decrease in  
17  
18 303 demand for antibiotics for acute bronchitis [58], however continued significant demand for  
19  
20 304 antibiotics for acute URTI is evident. This is illustrated in Table D in Supplementary Material.  
21  
22  
23  
24

25 305 The statistically significant difference in expecting an antibiotic for gender and age whereby  
26  
27 306 males were less likely to expect an antibiotic than females and older people (56+) are more likely  
28  
29 307 to be 'unsure' whether they will need antibiotics or not (70%) may be helpful to the HCP in  
30  
31 308 communicating with the patient regarding the risk/benefit balance of antibiotic treatment for  
32  
33 309 acute URTI. Also the finding of no difference between those who are entitled to free care  
34  
35 310 (medical card holders) and those who aren't, in their expectations of receiving antibiotics  
36  
37 311 indicates that economic factors (whether or not the patient is paying for the consultation) are not  
38  
39 312 of major importance in antibiotic expectation.  
40  
41  
42  
43

44 313 GPs and other primary care doctors are more likely to prescribe antibiotics to patients who  
45  
46 314 expect them or whom they believe expect them [45-59]. It has been suggested that 'patient  
47  
48 315 expectations' is an all-encompassing phrase that includes other reasons such as limited time,  
49  
50 316 poor doctor-patient communication and diagnostic uncertainty [45]. Therefore knowing that  
51  
52 317 only 34% of patients attending an OOH service expect an antibiotic for their acute URTI  
53  
54  
55  
56  
57  
58  
59  
60

1  
2  
3 318 symptoms and that this expectation is not associated with eligibility for free care helps in the  
4  
5 319 clinical decision making process and allows doctors to concentrate more on the medical need.  
6  
7  
8 320 Doctors may overestimate the pressure to prescribe antibiotics for acute cough [60-62] or other  
9  
10 321 acute respiratory illnesses [54], often prescribing antibiotics for patients who did not request  
11  
12 322 them [63]. Wong et al studying a Chinese primary care population presenting with acute URTI  
13  
14 323 symptoms, found that concern about illness severity and obtaining a prescription for  
15  
16 324 symptomatic medications, rather than obtaining a prescription for antibiotics, were the main  
17  
18 325 reasons for patients consulting [47]. Ong et al found, in a study of patients attending an  
19  
20 326 emergency department with acute URTI symptoms, that doctors were only able to identify 1 in 4  
21  
22 327 of those patients who expected antibiotic treatment for their symptoms [54]. The same study also  
23  
24 328 found that patient satisfaction was not related to receipt of antibiotics but was related to the belief  
25  
26 329 they had a better understanding of their illness [54].  
27  
28  
29  
30  
31  
32 330 There is some evidence that patients are less satisfied in general practices that have frugal  
33  
34 331 antibiotic prescribing practices in general [66]. However this retrospective study from England  
35  
36 332 with a 36% response rate did not estimate the effect of communication skills. It could be argued  
37  
38 333 that with enhanced communication skills and with the HCP eliciting and addressing the patients  
39  
40 334 concerns, the satisfaction rating for frugal prescribers would be considerably higher.  
41  
42  
43  
44 335 Several studies have shown that private patients who pay for their consultations [47, 67, 68], as  
45  
46 336 well as those of lower socioeconomic status [51, 69-72] are more likely to be prescribed  
47  
48 337 antibiotics for acute URTI. Our study showed no association between a patient's eligibility for  
49  
50 338 free care (or paying for their consultation) and expectation of an antibiotic for their acute URTI.  
51  
52 339 Because this eligibility was either due to age (under 6 and over 70 years of age) or income, it is  
53  
54 340 difficult to draw direct conclusions. However, most importantly and in contrast to earlier studies  
55  
56  
57  
58  
59  
60

1  
2  
3 341 [47, 67-68], patient expectation for antibiotics was found to be unrelated to having access to free  
4  
5 342 care.

6  
7  
8 343 In a study of non-medical practitioners (NMPs), Courtenay et al found reduced levels of  
9  
10 344 satisfaction among patients who expected but did not receive an antibiotic [44]. This figure  
11  
12 345 indicates that although NMPs appear to have strategies for managing acute URTI consultations,  
13  
14 346 there is still scope for improvement and these prescribers are therefore an important group to  
15  
16 347 involve in antimicrobial stewardship [44]. Antimicrobial stewardship programs should continue  
17  
18 348 to expand in the outpatient setting and should emphasize the importance of clear and direct  
19  
20 349 communication between patients and physicians [59, 73]. Patients from our study anticipated  
21  
22 350 further examination, information and symptomatic treatment. These findings closely echo those  
23  
24 351 of recent studies [44, 47, 54]. It is important to continue with public health campaigns to educate  
25  
26 352 the public on the ineffectiveness of antibiotics in treatment of acute URTI, which has been  
27  
28 353 shown to reduce public expectation for antibiotics in such cases [74].

29  
30  
31 354 Our sample represented 25% of the 1715 patients with acute URTI who attended the single  
32  
33 355 branch of the OOH facility from October 2017-February 2018 where all the sampling was  
34  
35 356 conducted. All patients had acute URTI symptoms. Although older people are under-represented,  
36  
37 357 the overall age and gender profile of those attending at the OOH facility with acute URTI  
38  
39 358 symptoms are very similar to those investigated in this study (see tables A and B in  
40  
41 359 Supplementary Material), suggesting that our results are representative of those attending at the  
42  
43 360 OOH facility during the study period. However, the proportion of those surveyed who were  
44  
45 361 eligible for free care differed considerably to the overall proportion of those attending at the  
46  
47 362 OOH facility with acute URTI during the study period (56% compared to 74%). It can also be  
48  
49 363 argued that people who decide that their illness is severe enough that they need to see a strange  
50  
51  
52  
53  
54  
55  
56  
57  
58  
59  
60

1  
2  
3 364 GP in an out of hours service in the weekend, evening or late at night and pay at least €55 as a  
4  
5 365 fee for doing so have a much greater motivation for getting an antibiotic prescription. Any other  
6  
7 366 medication that they receive from the GP (e.g. analgesia, cough bottles and antipyretics) does not  
8  
9  
10 367 require a prescription. The fact that 2/3 of respondents were unsure of whether they expected to  
11  
12 368 receive an antibiotic or did not expect to receive one is indicative that the message on AMR and  
13  
14 369 the overuse of antibiotics has reached the mind set of those attending an out of hours centre.

15  
16  
17 370 It is difficult to explain why over 50% of respondents had previously consulted for this particular  
18  
19 371 complaint. We did not ask when this previous consultation had taken place. Repeat consultation  
20  
21 372 rates of between 15% and 20% in children with acute URTI and between 20% and 30% in adults  
22  
23 373 with lower respiratory tract infections (LRTIs) have been described [75]. Between a half and two  
24  
25 374 thirds of adults with LRTI who re-consult are prescribed antibiotics, despite little evidence of an  
26  
27 375 infection requiring antibiotics [75].

28  
29  
30  
31  
32 376 This study contains several strengths. We used a previously validated questionnaire that was  
33  
34 377 adapted and piloted by a multi-disciplinary research and clinical team. The research was  
35  
36 378 conducted over four consecutive months which would mitigate the effects of any public health  
37  
38 379 campaigns aimed at reducing antibiotic use at the time. Patients or guardians filling in the short  
39  
40 380 and anonymous questionnaire before the consultation in the waiting room meant that respondents  
41  
42 381 were more likely to be honest in their opinion. The age and gender profile of our sample is very  
43  
44 382 similar to that of the population attending during the study period with acute URTI symptoms.  
45  
46 383 Reception staff received training from the research team and were tasked with identifying and  
47  
48 384 recruiting participants, ensuring that only those with acute URTI symptoms were surveyed. The  
49  
50 385 higher number of private patient respondents helped to ensure that the finding that they do not  
51  
52  
53  
54  
55  
56  
57  
58  
59  
60

1  
2  
3 386 expect antibiotics is reliable. Previous studies of this subgroup have indicated that they have a  
4  
5 387 higher expectation for antibiotics for acute URTI.  
6  
7

8 388 There are also some limitations. Our study surveyed people attending only one urban OOH  
9  
10 389 service. It is possible that those who refused to participate in the survey were more severely ill  
11  
12 390 than those who did and were more likely to look for antibiotics (approximately 5% of those  
13  
14 391 requested, refused to participate). The demographics of those who refused to participate were not  
15  
16 392 studied. As this is a single centre study, the population studied in this particular OOH service  
17  
18 393 may not reflect those seen in OOH services throughout Ireland and/or the UK. While every effort  
19  
20 394 was made to ensure that this was a representative sample of those attending with acute URTI, it  
21  
22 395 is possible that the results were skewed as those eligible for free care was slightly lower than the  
23  
24 396 centres overall population. Older people (over the age of 56 years) are poorly represented in our  
25  
26 397 sample. It is possible that the results would have been different if older people were better  
27  
28 398 represented. Reception staff who were not medically trained were charged with the tasks of  
29  
30 399 distributing questionnaires. This is a potential limitation in that they may have not correctly  
31  
32 400 identified (and therefore missed) a cohort of patients who had acute respiratory tract infections.  
33  
34 401 However the note of the patient's initial presenting symptom to the call centre was available to  
35  
36 402 reception staff which would have minimised this. The patient's desire for antibiotics was not  
37  
38 403 assessed against the clinician-assessed need for antibiotics. However the point of the study was  
39  
40 404 to assess overall patient expectation. Severity and duration of the illness was not assessed which  
41  
42 405 may have affected patient expectation for antibiotics.  
43  
44  
45  
46  
47  
48  
49

50 406

51  
52  
53 407 **CONCLUSIONS**  
54  
55  
56  
57  
58  
59  
60



1  
2  
3 408 A large proportion of those attending out of hours GP service do not have fixed ideas regarding  
4  
5 409 antibiotics and are seeking further assessment, information and reassurance. Most seem to be  
6  
7 410 amenable to not receiving an antibiotic for their illness if their underlying needs are met. This  
8  
9 411 group includes patients eligible for free care as well as those paying for their consultation.  
10  
11  
12 412 Communication and clinical skills of healthcare professionals need to be optimised to ensure  
13  
14 413 reduction in antibiotic prescribing.  
15  
16  
17  
18 414

### 415 **Recommendations for Further Research**

416 The high number of repeat attendances for acute URTI requires further study. A qualitative study  
417 of patients attending OOH setting to elicit what their intentions are for attending and their  
418 understanding of AMR is also appropriate.  
419

### 420 **Abbreviations**

421 AMR: antimicrobial or antibiotic resistance; acute URTI: acute upper respiratory tract infection;  
422 URTI: upper respiratory tract infection; OOH: out of hours; HCP: healthcare professional; GPs:  
423 general practitioners; Further Exam: further examination; Info: Information; LRTIs: lower  
424 respiratory tract infections  
425

### 426 **DECLARATIONS**

#### 427 **Ethical approval and consent to participate**

1  
2  
3 428 Ethical approval for the study was granted by the Health Service Executive Mid-West Research  
4  
5 429 Ethics Committee. Ethics Approval Number: 068/17.  
6  
7

8 **430 Consent for publication**  
9

10  
11 **431 Not applicable**  
12  
13

14 **432 Availability of data and materials**  
15

16  
17 433 The datasets generated and/or analysed during the current study are not publically available due  
18  
19 434 to variables that could identify GPs through name of practice and location but are available from  
20  
21 435 the corresponding author on reasonable request.  
22  
23  
24

25 **436 Competing Interests**  
26

27  
28 437 The authors declare they have no competing interests.  
29  
30

31 **438 Funding**  
32

33  
34 439 This research was part funded by the Irish College of General Practitioners Research and  
35  
36 440 Education Foundation.  
37  
38

39 **441 Authors Contributions**  
40

41  
42 442 ROC conceived the study. AOR, JOD, CMcM, ROC were involved in the design of the study.  
43  
44 443 ROC and CMcM collected the data. JOD and ROC inputted the data. AON carried out statistical  
45  
46 444 analysis. ROC, CD, AOR and JOD wrote the first draft of the paper. All authors made critical  
47  
48 445 comments on all drafts of the paper, as well as read and approved the final manuscript.  
49  
50  
51

52 446  
53  
54

55 **447 Acknowledgements**  
56  
57  
58  
59  
60

1  
2  
3 448 Professor Ailish Hannigan, Professor of Biostatistics University of Limerick Graduate Entry  
4  
5 449 Medical School, for help with study design and analysis. Prof. Molly Courtenay, School of  
6  
7 450 Healthcare Sciences, Cardiff University, Cardiff, UK for permission to adapt their patient  
8  
9  
10 451 questionnaire. Mike Finucane and Deirdre Walsh, 'Shannondoc' head office, Shelbourne Rd.,  
11  
12 452 Limerick City. Noeleen Lyons, Maura O'Regan, Paul Gallagher from 'Shannondoc' Dooradoyle  
13  
14 453 treatment centre, Limerick City.  
15  
16  
17  
18 454  
19  
20

### 21 455 **List of Figure and Table Legends**

22  
23  
24 456 Table 1: Patient characteristics and pre-consultation expectations of antibiotics (n=435)  
25

26 457 Table 2: Patient expectations for each symptom  
27

28  
29 458 Table 3: Antibiotic expectations of those presenting with different symptoms  
30

31  
32 459 Figure 1: Patients overall expectations  
33  
34

### 35 460 **List of Supplementary Figure and Table Legends**

36  
37  
38 461 Table A: Gender Proportion of those attending OOH Facility with acute URTI symptoms  
39

40  
41 462 Table B: Age of those attending OOH Facility overall during the study period  
42  
43

44 463 Table C: Eligibility for free care  
45  
46

47 464 Table D: Patient expectation for antibiotics for acute URTI over the last 20 years  
48  
49

50 465  
51  
52

53 466  
54  
55  
56  
57  
58  
59  
60

467

468 **REFERENCES**

- 469 1. Aryee A, Price N. Antimicrobial stewardship - can we afford to do without it? *Br J Clin*  
470 *Pharmacol* 2014;79(2):173-81. doi: 10.1111/bcp.12417
- 471 2. Bell BG, Schellevis F, Stobberingh E, et al. A systematic review and meta-analysis of the  
472 effects of antibiotic consumption on antibiotic resistance. *BMC Infect Dis* 2014;14:13:1-25. doi:  
473 10.1186/1471-2334-14-13.
- 474 3. Power RF, Linnane B, Martin R, et al. The first reported case of Burkholderia contaminans in  
475 patients with cystic fibrosis in Ireland: from the Sargasso Sea to Irish Children. *BMC Pulm Med*  
476 2016;16(1):57:1-5. doi: 10.1186/s12890-016-0219-z.
- 477 4. O'Connor C, Cormican M, Boo TW, et al. An Irish outbreak of New Delhi metallo-beta-  
478 lactamase (NDM)-1 carbapenemase-producing Enterobacteriaceae: increasing but unrecognized  
479 prevalence. *J Hosp Infect* 2016;94(4):351-57. doi: 10.1016/j.jhin.2016.08.005
- 480 5. O'Connor C, O'Connell NH, Commane M, et al. Limerick: forever associated with five lines  
481 of rhyme or infamous for irrepressible carbapenemase-producing Enterobacteriaceae for all  
482 time? *J Hosp Infect* 2016;93(2):155-6. doi: 10.1016/j.jhin.2016.03.008.
- 483 6. Health Products Regulatory Authority. Report on Antimicrobial Resistance. Report. Dublin:  
484 January 2016. Available from: [https://www.hpra.ie/docs/default-source/publications-](https://www.hpra.ie/docs/default-source/publications-forms/newsletters/hpra-report-on-antimicrobial-resistance.pdf?sfvrsn=6)  
485 [forms/newsletters/hpra-report-on-antimicrobial-resistance.pdf?sfvrsn=6](https://www.hpra.ie/docs/default-source/publications-forms/newsletters/hpra-report-on-antimicrobial-resistance.pdf?sfvrsn=6) (accessed 18/04/2018).

- 1  
2  
3 486 7. World Health Organisation (WHO). Antimicrobial resistance: global report on surveillance  
4  
5 487 2014. Report. Switzerland: June 2014. Available from:  
6  
7 488 <http://www.who.int/drugresistance/documents/surveillancereport/en/>. (accessed 27/04/2018).  
8  
9  
10 489 8. SARI Hospital Antimicrobial Stewardship Working Group. Guidelines for Antimicrobial  
11  
12 Stewardship in Hospitals in Ireland. Dublin, Ireland, 2009:1-50. Available at:  
13 490  
14 [https://www.hpsc.ie/a-](https://www.hpsc.ie/a-z/microbiologyantimicrobialresistance/infectioncontrolandhai/guidelines/File,4116,en.pdf)  
15 491  
16 [z/microbiologyantimicrobialresistance/infectioncontrolandhai/guidelines/File,4116,en.pdf](https://www.hpsc.ie/a-z/microbiologyantimicrobialresistance/infectioncontrolandhai/guidelines/File,4116,en.pdf)  
17 492  
18 (accessed 10/04/2018).  
19 493  
20  
21  
22 494 9. Nathan C, Cars O. Antibiotic Resistance-Problems, Progress and Prospects. *N Engl J Med*  
23  
24 2014;371(19):1761-63. doi: 10.1056/NEJMp1408040.  
25 495  
26  
27 496 10. Harbarth S, Balkhy HH, Goossens H, et al. Antimicrobial resistance: one world, one fight!  
28  
29 *Antimicrob Resist Infect Control* 2015;4:49. doi: 10.1186/s13756-015-0091-2.  
30 497  
31  
32 498 11. The National Institute for Health and Care Excellence (NICE). Antimicrobial stewardship:  
33  
34 systems and processes for effective antimicrobial medicine use. NICE Guideline (NG 15). UK.  
35 499  
36 August 2015. <https://www.nice.org.uk/guidance/ng15/chapter/1-Recommendations>. (accessed  
37 500  
38 18/04/2018).  
39 501  
40  
41  
42 502 12. The National Institute for Health and Care Excellence (NICE). Antimicrobial stewardship:  
43  
44 changing risk related behaviours in the general population. NICE Guideline (NG 63). UK.  
45 503  
46 January 2017. Available at: <https://www.nice.org.uk/guidance/ng63>. (accessed 02/04/2018).  
47 504  
48  
49  
50 505 13. Harris AM, Hicks LA, Qaseem A, et al. Appropriate antibiotic use for acute respiratory tract  
51  
52 infection in adults: Advice for high-value care from the american college of physicians and the  
53 506  
54  
55  
56  
57  
58  
59  
60

- 1  
2  
3 507 centers for disease control and prevention. *Ann Intern Med* 2016;164(6):425-34. doi:  
4  
5 508 10.7326/M15-1840.  
6  
7  
8 509 14. Lee ML, Cho CY, Hsu CL, et al. Recent trends in antibiotic prescriptions for acute  
9  
10 510 respiratory tract infections in pediatric ambulatory care in Taiwan, 2000-2009: A nationwide  
11  
12 511 population-based study. *J Microbiol Immunol Infec = Wei mian yu gan ran za zhi*  
13  
14 512 2016;49(4):554-60 doi: 10.1016/j.jmii.2014.08.014|.  
15  
16  
17  
18 513 15. The National Institute for Health and Care Excellence (NICE). Self-limiting respiratory tract  
19  
20 514 infections –antibiotic prescribing. NICE Clinical Guideline (CG 69). UK. July 2008. Available  
21  
22 515 from: <https://www.nice.org.uk/guidance/cg69> (accessed 28/03/2018).  
23  
24  
25  
26 516 16. Meropol SB, Localio AR, Metlay JP. Risks and benefits associated with antibiotic use for  
27  
28 517 acute respiratory infections: a cohort study. *Ann Fam Med* 2013;11(2):165-72 doi:  
29  
30 518 10.1370/afm.1449.  
31  
32  
33  
34 519 17. Fahey T, Stocks N, Thomas T. Systematic review of the treatment of upper respiratory tract  
35  
36 520 infection. *Arch Dis Child* 1998;79(3):225-30  
37  
38  
39 521 18. Little P, Watson L, Morgan S, et al. Antibiotic prescribing and admissions with major  
40  
41 522 suppurative complications of respiratory tract infections: a data linkage study. *Br J Gen Pract*  
42  
43 523 2002;52(476):187-90, 93  
44  
45  
46 524 19. Butler CC, Hood K, Verheij T, et al. Variation in antibiotic prescribing and its impact on  
47  
48 525 recovery in patients with acute cough in primary care: prospective study in 13 countries. *BMJ*  
49  
50 526 2009;338:b2242. doi: 10.1136/bmj.b2242.  
51  
52  
53  
54  
55  
56  
57  
58  
59  
60

- 1  
2  
3 527 20. Gulliford MC, Moore MV, Little P, et al. Safety of reduced antibiotic prescribing for self  
4  
5 528 limiting respiratory tract infections in primary care: cohort study using electronic health records.  
6  
7 529 *BMJ* 2016;354:i3410. doi: 10.1136/bmj.i3410.  
8  
9  
10  
11 530 21. Garbutt JM, Banister C, Spitznagel E, et al. Amoxicillin for acute rhinosinusitis: a  
12  
13 531 randomized controlled trial. *JAMA* 2012;307(7):685-92 doi: 10.1001/jama.2012.138.  
14  
15  
16 532 22. The National Institute for Health and Care Excellence (NICE). Medicines Evidence  
17  
18 533 Commentary: Acute cough – public expectation of symptom duration differs from published  
19  
20 534 evidence. NICE. UK. November 2013. Available from:  
21  
22 535 [https://www.evidence.nhs.uk/search?q=%27Acute+cough+%E2%80%93+public+expectation+o](https://www.evidence.nhs.uk/search?q=%27Acute+cough+%E2%80%93+public+expectation+of+symptom+duration+differs+from+published+evidence%27)  
23  
24 536 [f+symptom+duration+differs+from+published+evidence%27](https://www.evidence.nhs.uk/search?q=%27Acute+cough+%E2%80%93+public+expectation+of+symptom+duration+differs+from+published+evidence%27). (Accessed 20/03/2018)  
25  
26  
27  
28 537 23. Spinks A, Glasziou PP, Del Mar CB. Antibiotics for sore throat. *Cochrane Database Syst*  
29  
30 538 *Rev* 2013(11):Cd000023 doi:10.1002/14651858.CD000023.pub4. (Accessed 16/01/2018).  
31  
32  
33 539 24. Little P, Gould C, Williamson I, et al. Reattendance and complications in a randomised trial  
34  
35 540 of prescribing strategies for sore throat: the medicalising effect of prescribing antibiotics. *BMJ*  
36  
37 541 1997;315(7104):350-2  
38  
39  
40  
41 542 25. Yaeger JP, Temte JL, Hanrahan LP, et al. Roles of Clinician, Patient, and Community  
42  
43 543 Characteristics in the Management of Pediatric Upper Respiratory Tract Infections. *Ann Fam*  
44  
45 544 *Med* 2015;13(6):529-36 doi: 10.1370/afm.1856.  
46  
47  
48  
49 545 26. Silverman M, Povitz M, Sontrop JM, et al. Antibiotic Prescribing for Nonbacterial Acute  
50  
51 546 Upper Respiratory Infections in Elderly Persons. *Ann Intern Med* 2017;166(11):765-74 doi:  
52  
53 547 10.7326/m16-1131.  
54  
55  
56  
57  
58  
59  
60

- 1  
2  
3 548 27. Schroeck JL, Ruh CA, Sellick JA, Jr., et al. Factors associated with antibiotic misuse in  
4  
5 549 outpatient treatment for upper respiratory tract infections. *Antimicrob Agents Chemother*  
6  
7 550 2015;59(7):3848-52 doi: 10.1128/aac.00652-15.  
8  
9  
10 551 28. Teng CL. Antibiotic prescribing for upper respiratory tract infections in the Asia-Pacific  
11  
12 552 region: A brief review. *Malays Fam Physician* 2014;9(2):18-25  
13  
14  
15 553 29. Murphy M, Bradley CP, Byrne S. Antibiotic prescribing in primary care, adherence to  
16  
17 554 guidelines and unnecessary prescribing - an Irish perspective. *BMC Fam Pract* 2012;13:43-43  
18  
19 555 doi: 10.1186/1471-2296-13-43.  
20  
21  
22 556 30. Rún Sigurðardóttir N, Nielsen ABS, Munck A, et al. Appropriateness of antibiotic  
23  
24 557 prescribing for upper respiratory tract infections in general practice: Comparison between  
25  
26 558 Denmark and Iceland. *Scand J Prim Health Care* 2015;33(4):269-74 doi:  
27  
28 559 10.3109/02813432.2015.1114349.  
29  
30  
31 560 31. Davis ME, Liu TL. Exploring Patient Awareness and Perceptions of the Appropriate Use of  
32  
33 561 Antibiotics: A Mixed-Methods Study. *Antibiotics (Basel)*. 2017 Oct 31;6(4) doi:  
34  
35 562 10.3390/antibiotics6040023.  
36  
37  
38 563 32. Watkins L, Sanchez G, Albert A, et al. Knowledge and Attitudes Regarding Antibiotic Use  
39  
40 564 Among Adult Consumers, Adult Hispanic Consumers, and Health Care Providers — United  
41  
42 565 States, 2012–2013. *MMWR USA* 2015/64(28):767-70. Available at:  
43  
44 566 <https://www.cdc.gov/mmwr/preview/mmwrhtml/mm6428a5.htm> (accessed 16/01/2018).  
45  
46  
47  
48  
49  
50 567 33. Public Health England. Health matters: antimicrobial resistance. PH England. UK. December  
51  
52 568 2015. Available From: [https://www.gov.uk/government/publications/health-matters-](https://www.gov.uk/government/publications/health-matters-antimicrobial-resistance)  
53  
54 569 antimicrobial-resistance (accessed 16/01/2018).  
55  
56  
57  
58  
59  
60



- 1  
2  
3 570 34. McDonagh M, Peterson K, Winthrop K, et al. Improving Antibiotic Prescribing for  
4  
5 571 Uncomplicated Acute Respiratory Tract Infections [Internet]. Rockville (MD). *AHRQ*  
6  
7 572 *WebM&M*; Report No.: 15(16)-EHC033-EF. 2016 Jan. (Comparative Effectiveness Reviews,  
8  
9 573 No. 163.) Available from: <https://www.ncbi.nlm.nih.gov/books/NBK344270/> (accessed  
10  
11 574 16/01/2018)
- 12  
13  
14  
15 575 35. Lindberg BH, Gjelstad S, Foshaug M, et al. Antibiotic prescribing for acute respiratory tract  
16  
17 576 infections in Norwegian primary care out-of-hours service. *Scand J Prim Health Care*  
18  
19 577 2017;35(2):178-85 doi: 10.1080/02813432.2017.1333301.
- 20  
21  
22  
23 578 36. Huibers L, Moth G, Christensen MB, et al. Antibiotic prescribing patterns in out-of-hours  
24  
25 579 primary care: A population-based descriptive study. *Scand J Prim Health Care* 2014;32(4):200-  
26  
27 580 07 doi: 10.3109/02813432.2014.972067.
- 28  
29  
30  
31 581 37. Dyrkorn R, Gjelstad S, Espnes KA, et al. Peer academic detailing on use of antibiotics in  
32  
33 582 acute respiratory tract infections. A controlled study in an urban Norwegian out-of-hours service.  
34  
35 583 *Scand J Prim Health Care* 2016;34(2):180-5 doi: 10.3109/02813432.2016.1163035.
- 36  
37  
38 584 38. Elshout G, Kool M, Van der Wouden JC, et al. Antibiotic prescription in febrile children: a  
39  
40 585 cohort study during out-of-hours primary care. *J Am Board Fam Med* 2012;25(6):810-8 doi:  
41  
42 586 10.3122/jabfm.2012.06.110310.
- 43  
44  
45  
46 587 39. Giesen P, Willekens M, Mokkink H, et al. Out-of-hours primary care: development of  
47  
48 588 indicators for prescribing and referring. *Int J Qual Health Care* 2007;19(5):289-95 doi:  
49  
50 589 10.1093/intqhc/mzm027.
- 51  
52  
53 590 40. Willekens M, Giesen P, Plat E, et al. Quality of after-hours primary care in the Netherlands:  
54  
55 591 adherence to national guidelines. *BMJ Qual Saf* 2011;20:223-27

- 1  
2  
3 592 41. Hayward GN, Fisher RF, Spence GT, et al. Increase in antibiotic prescriptions in out-of-  
4  
5 593 hours primary care in contrast to in-hours primary care prescriptions: service evaluation in a  
6  
7 594 population of 600 000 patients. *J Antimicrob Chemother* 2016;71(9):2612-9 doi:  
8  
9 595 10.1093/jac/dkw189.
- 10  
11  
12  
13 596 42. Debets VE, Verheij TJ, van der Velden AW. Antibiotic prescribing during office hours and  
14  
15 597 out-of-hours: a comparison of quality and quantity in primary care in the Netherlands. *Br J Gen*  
16  
17 598 *Pract* 2017;67(656):e178-e86 doi: 10.3399/bjgp17X689641.
- 18  
19  
20  
21 599 43. Kallestrup P, Bro F. Parents' beliefs and expectations when presenting with a febrile child at  
22  
23 600 an out-of-hours general practice clinic. *Br J Gen Pract* 2003;53(486):43-44
- 24  
25  
26 601 44. Courtenay M, Rowbotham S, Lim R, et al. Antibiotics for acute respiratory tract infections: a  
27  
28 602 mixed-methods study of patient experiences of non-medical prescriber management. *BMJ Open*  
29  
30 603 2017;7(3):e013515 doi: 10.1136/bmjopen-2016-013515.
- 31  
32  
33 604 45. Fletcher-Lartey S, Yee M, Gaarslev C, et al. Why do general practitioners prescribe  
34  
35 605 antibiotics for upper respiratory tract infections to meet patient expectations: a mixed methods  
36  
37 606 study. *BMJ Open* 2016;6(10):e012244 doi: 10.1136/bmjopen-2016-012244.
- 38  
39  
40  
41 607 46. Md Rezal RS, Hassali MA, Alrasheedy AA, et al. Physicians' knowledge, perceptions and  
42  
43 608 behaviour towards antibiotic prescribing: a systematic review of the literature. *Expert Rev Anti*  
44  
45 609 *Infect Ther* 2015;13(5):665-80 doi: 10.1586/14787210.2015.1025057.
- 46  
47  
48  
49 610 47. Wong CK, Liu Z, Butler CC, et al. Help-seeking and antibiotic prescribing for acute cough in  
50  
51 611 a Chinese primary care population: a prospective multicentre observational study. *NPJ Prim*  
52  
53 612 *Care Respir Med* 2016;26:15080 doi: 10.1038/npjpcrm.2015.80.
- 54  
55  
56  
57  
58  
59  
60

- 1  
2  
3 613 48. Gambarelli L, Montanari C, Manni A, et al. Antibiotics in viral upper respiratory tract  
4  
5 614 infections. *Ricerca e Pratica* 2002;18(4):152-56  
6  
7  
8 615 49. Biezen R, Brijnath B, Grando D, et al. Management of respiratory tract infections in young  
9  
10 616 children-A qualitative study of primary care providers' perspectives. *NPJ Prim Care Respir Med*  
11  
12 617 2017;27(1):15 doi: 10.1038/s41533-017-0018-x.  
13  
14  
15  
16 618 50. Hamm RM, Hicks RJ, Bemben DA. Antibiotics and respiratory infections: are patients more  
17  
18 619 satisfied when expectations are met? *J Fam Pract* 1996;43(1):56-62  
19  
20  
21 620 51. Shlomo V, Adi R, Eliezer K. The knowledge and expectations of parents about the role of  
22  
23 621 antibiotic treatment in upper respiratory tract infection--a survey among parents attending the  
24  
25 622 primary physician with their sick child. *BMC Fam Pract* 2003;4:20 doi: 10.1186/1471-2296-4-  
26  
27 623 20.  
28  
29  
30  
31 624 52. Martin CL, Njike VY, Katz DL. Back-up antibiotic prescriptions could reduce unnecessary  
32  
33 625 antibiotic use in rhinosinusitis. *J Clin Epidemiol* 2004;57(4):429-34 doi:  
34  
35 626 10.1016/j.jclinepi.2003.09.008.  
36  
37  
38  
39 627 53. Soma M, Slapgard H, Lerberg M, et al. [Patients' expectations of antibiotics for acute  
40  
41 628 respiratory tract infections]. *Tidsskr. Nor. Laegeforen* 2005;125(15):1994-7  
42  
43  
44 629 54. Ong S, Nakase J, Moran GJ, et al. Antibiotic use for emergency department patients with  
45  
46 630 upper respiratory infections: prescribing practices, patient expectations, and patient satisfaction.  
47  
48 631 *Ann Emerg Med* 2007;50(3):213-20 doi: 10.1016/j.annemergmed.2007.03.026.  
49  
50  
51  
52  
53  
54  
55  
56  
57  
58  
59  
60

- 1  
2  
3 632 55. Ackerman SL, Gonzales R, Stahl MS, et al. One size does not fit all: evaluating an  
4  
5 633 intervention to reduce antibiotic prescribing for acute bronchitis. *BMC Health Serv Res*  
6  
7 634 2013;13(1):462 doi: 10.1186/1472-6963-13-462.  
8  
9  
10 635 56. Hardy-Holbrook R, Svetlana A, Vandana C, et al. Antibiotic resistance and prescribing in  
11  
12 636 Australia: Current attitudes and practice of GPs. *Healthc Infect* 2013;18(4):147-51  
13  
14  
15 637 57. McNulty CA, Nichols T, French DP, et al. Expectations for consultations and antibiotics for  
16  
17 638 respiratory tract infection in primary care: the RTI clinical iceberg. *Br J Gen Pract*  
18  
19 639 2013;63(612):e429-36 doi: 10.3399/bjgp13X669149.  
20  
21  
22 640 58. Dempsey P, Businger A, Whaley L, et al. Primary care clinicians' perceptions about  
23  
24 641 antibiotic prescribing for acute bronchitis: a qualitative study. *BMC Fam Pract* 2014;15:194 doi:  
25  
26 642 10.1186/s12875-014-0194-5.  
27  
28  
29 643 59. McKay R, Mah A, Law M. Systematic Review of Factors Associated with Antibiotic  
30  
31 644 Prescribing for Respiratory Tract Infections. *Antimicrob Agents Chemother* 2016;60(7):4106-18  
32  
33 645 doi: 10.1128/aac.00209-16.  
34  
35  
36 646 60. Welschen I, Kuyvenhoven M, Hoes A, et al. Antibiotics for acute respiratory tract symptoms:  
37  
38 647 patients' expectations, GPs' management and patient satisfaction. *Fam Pract* 2004;21(3):234-7  
39  
40  
41 648 61. Altiner A, Knauf A, Moebes J, et al. Acute cough: a qualitative analysis of how GPs manage  
42  
43 649 the consultation when patients explicitly or implicitly expect antibiotic prescriptions. *Fam Pract*  
44  
45 650 2004;21(5):500-6 doi: 10.1093/fampra/cmh505.  
46  
47  
48 651 62. Linder JA, Singer DE. Desire for antibiotics and antibiotic prescribing for adults with upper  
49  
50  
51 652 respiratory tract infections. *J Gen Intern Med* 2003;18(10):795-801  
52  
53  
54  
55  
56  
57  
58  
59  
60

- 1  
2  
3 653 63. Kautz-Freimuth S, Redaelli M, Samel C, et al. Parental views on acute otitis media (AOM)  
4  
5 654 and its therapy in children - results of an exploratory survey in German childcare facilities. *BMC*  
6  
7 655 *Pediatr* 2015;15:199 doi: 10.1186/s12887-015-0516-3.  
8  
9  
10 656 64. Department of Health Ireland. Health Service Executive. Cards and schemes: Medical cards.  
11  
12  
13 657 Dublin 2018. Available at: <https://www.hse.ie/eng/cards-schemes/medical-card/> (accessed  
14  
15 658 07/02/2018).  
16  
17  
18 659 65. Panagakou SG, Spyridis N, Papaevangelou V, et al. Antibiotic use for upper respiratory tract  
19  
20 660 infections in children: a cross-sectional survey of knowledge, attitudes, and practices (KAP) of  
21  
22 661 parents in Greece. *BMC Pediatr* 2011;11:60 doi: 10.1186/1471-2431-11-60.  
23  
24  
25 662 66. Ashworth M, White P, Jongsma H, et al. Antibiotic prescribing and patient satisfaction in  
26  
27 663 primary care in England: cross-sectional analysis of national patient survey data and prescribing  
28  
29 664 data. *Br J Gen Pract* 2016;66(642):e40-e46 doi: 10.3399/bjgp15X688105.  
30  
31  
32 665 67. Murphy M, Byrne S, Bradley CP. Influence of patient payment on antibiotic prescribing in  
33  
34 666 Irish general practice: a cohort study. *Br J Gen Pract* 2011;61(590):e549-55 doi:  
35  
36 667 10.3399/bjgp11X593820.  
37  
38  
39 668 68. Ab Rahman N, Teng CL, Sivasampu S. Antibiotic prescribing in public and private practice:  
40  
41 669 a cross-sectional study in primary care clinics in Malaysia. *BMC Infect Dis* 2016;16:208 doi:  
42  
43 670 10.1186/s12879-016-1530-2.  
44  
45  
46 671 69. Kumar S, Little P, Britten N. Why do general practitioners prescribe antibiotics for sore  
47  
48 672 throat? Grounded theory interview study. *BMJ* 2003;326(7381):138  
49  
50  
51  
52  
53  
54  
55  
56  
57  
58  
59  
60

- 1  
2  
3 673 70. Vaz L, Kleinman K, Lakoma M, et al. Prevalence of Parental Misconceptions About  
4  
5 674 Antibiotic Use. *Pediatrics* 2015;136(2):221-31 doi: 10.1542/peds.2015-0883.  
6  
7  
8 675 71. Rousounidis A, Papaevangelou V, Hadjipanayis A, et al. Descriptive study on parents'  
9  
10 676 knowledge, attitudes and practices on antibiotic use and misuse in children with upper  
11  
12 677 respiratory tract infections in Cyprus. *Int J Environ Res Public Health* 2011;8(8):3246-62 doi:  
13  
14 678 10.3390/ijerph8083246.  
15  
16  
17  
18 679 72. Salazar M, English T, Eiland L. Caregivers' baseline understanding and expectations of  
19  
20 680 antibiotic use for their children. *Clin Pediatr (Phila)* 2012;51(7):632-7 doi:  
21  
22 681 10.1177/0009922812439243.  
23  
24  
25  
26 682 73. Little P, Stuart B, Francis NA, et al. Effects of internet-based training on antibiotic  
27  
28 683 prescribing rates for acute respiratory-tract infections: a multinational, cluster, randomised,  
29  
30 684 factorial, controlled trial. *Lancet* 2013;382 doi: 10.1016/s0140-6736(13)60994-0.  
31  
32  
33  
34 685 74. Chaintarli K, Ingle SM, Bhattacharya A, et al. Impact of a United Kingdom-wide campaign  
35  
36 686 to tackle antimicrobial resistance on self-reported knowledge and behaviour change. *BMC Public*  
37  
38 687 *Health* 2016;16:393 doi: 10.1186/s12889-016-3057-2.  
39  
40  
41 688 75. Stanton N, Francis NA, Butler CC. Reducing uncertainty in managing respiratory tract  
42  
43 689 infections in primary care. *Br J Gen Pract* 2010;60(581):e466-75 doi: 10.3399/bjgp10X544104.  
44  
45  
46  
47  
48  
49  
50  
51  
52  
53  
54  
55  
56  
57  
58  
59  
60

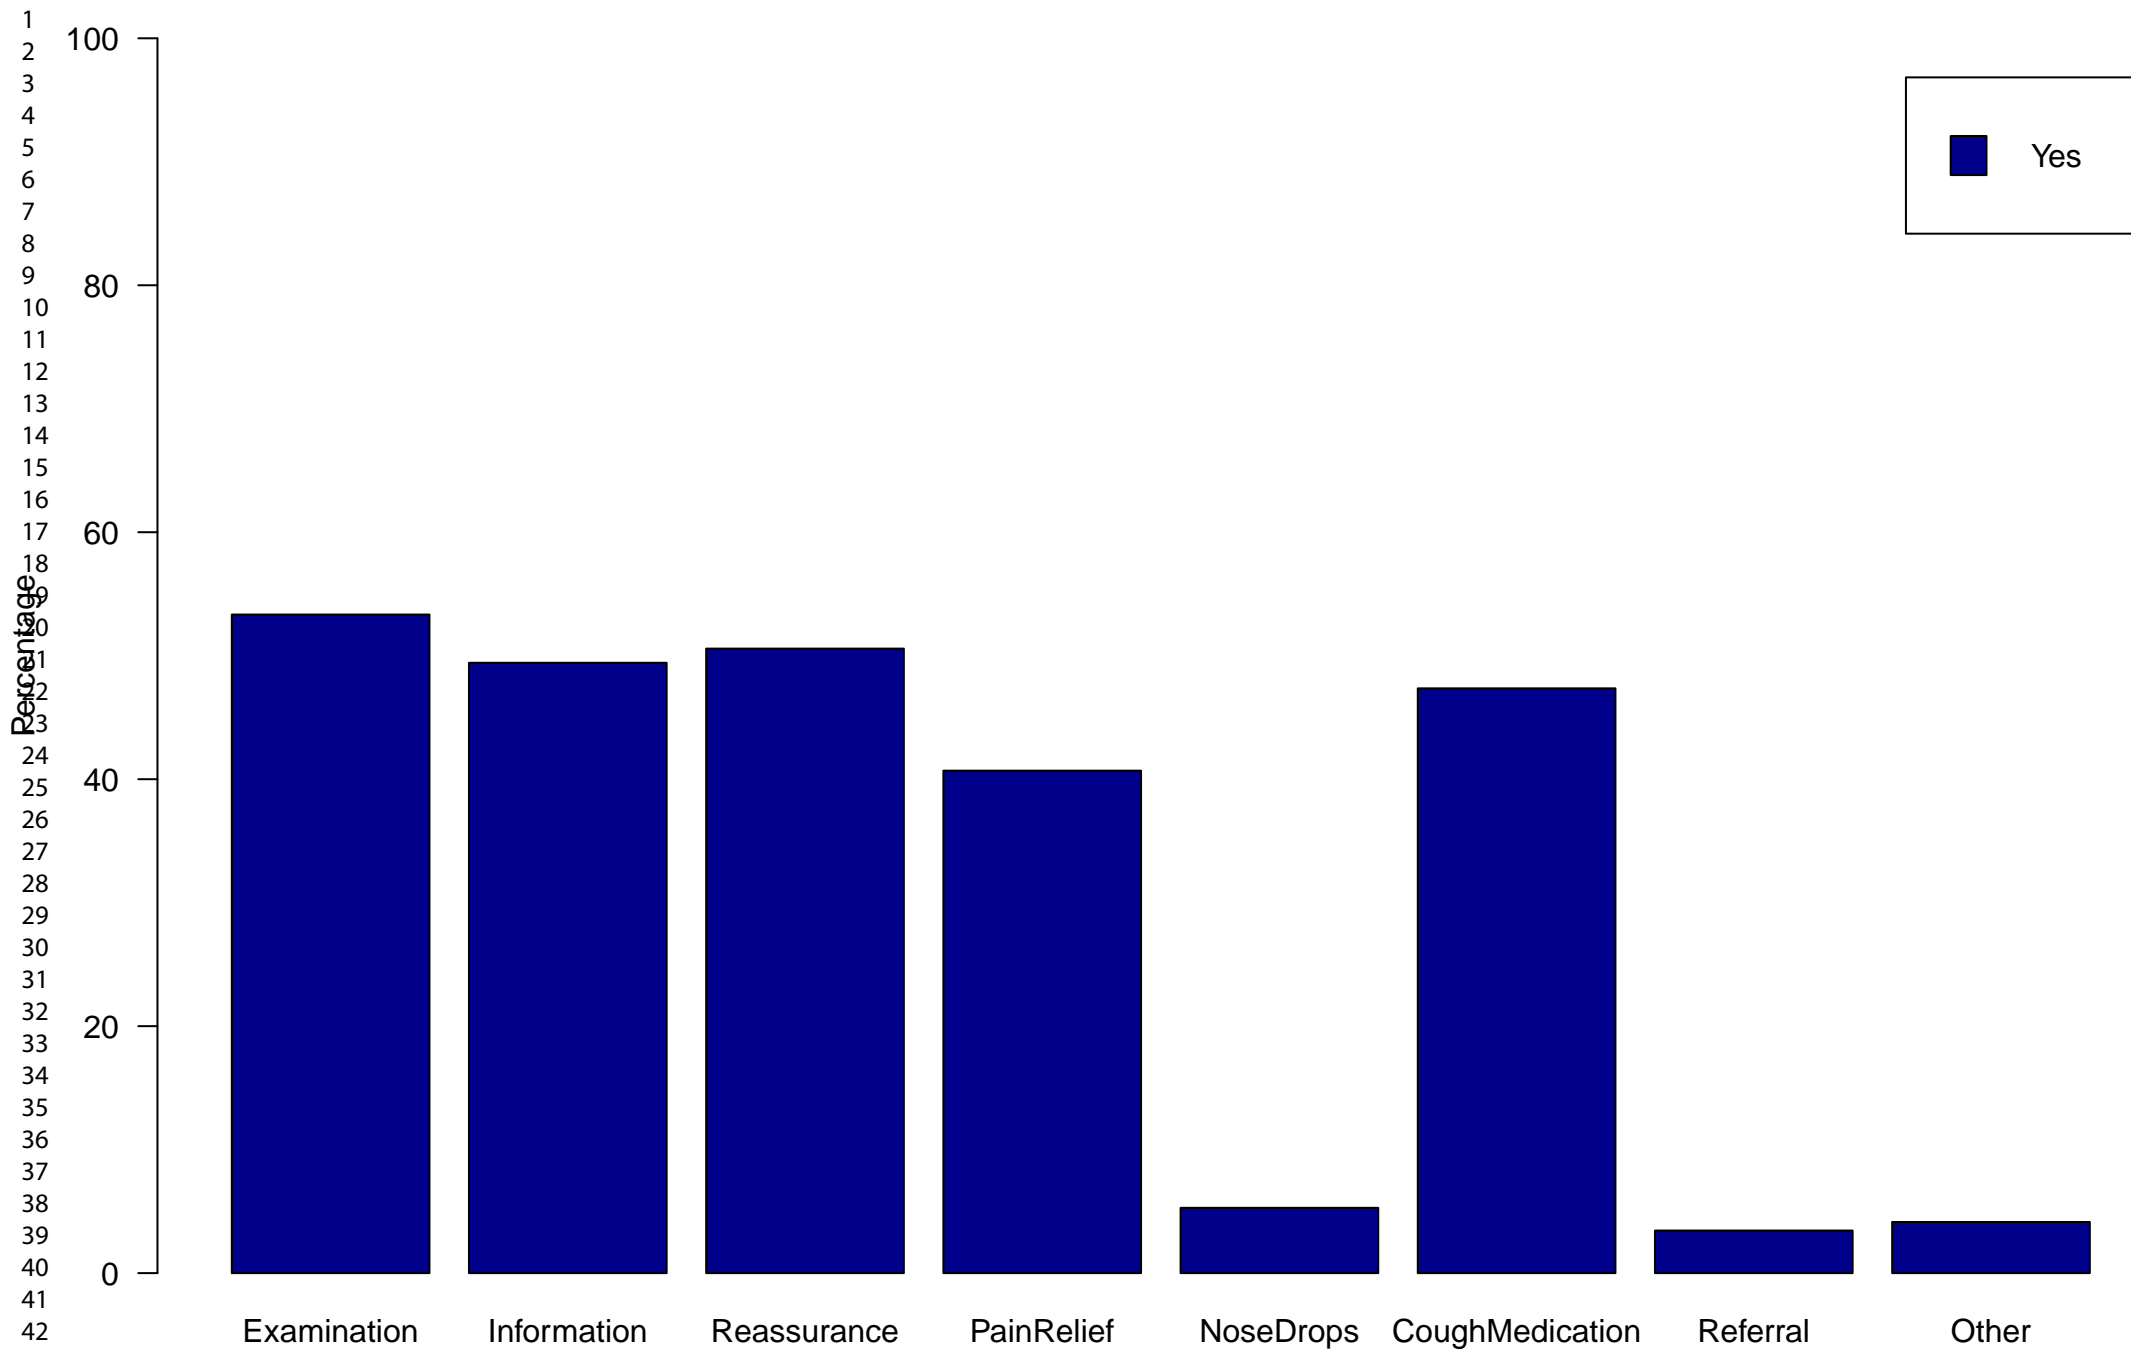

1  
2  
3  
4  
5  
6  
7  
8  
9  
10  
11  
12  
13  
14  
15  
16  
17  
18  
19  
20  
21  
22  
23  
24  
25  
26  
27  
28  
29  
30  
31  
32  
33  
34  
35  
36  
37  
38  
39  
40  
41  
42  
43  
44  
45  
46

## Study of The Treatment of Breathing Complaints of the Upper Airway

### Appendix 1. Patient questionnaire.

Please complete the following for you (if you are the patient) or your child (if your child is the patient):

1. Age: Under 6  6-25  26-55  56-70  Over 70

2. Gender: Male  Female

3. Medical card: Yes  No

4. Is it your first consultation with a GP or Shannondoc for this complaint? Yes  No

5. Do you expect to receive antibiotics for this illness? Yes  No  Unsure

#### 6. Reasons for seeing the doctor (please tick all that apply):

|                                                                 |                          |
|-----------------------------------------------------------------|--------------------------|
| <i>Ear ache or discharge</i>                                    | <input type="checkbox"/> |
| <i>Complaints of nose/sinuses</i>                               | <input type="checkbox"/> |
| <i>Common cold</i>                                              | <input type="checkbox"/> |
| <i>Throat ache</i>                                              | <input type="checkbox"/> |
| <i>Cough</i>                                                    | <input type="checkbox"/> |
| <i>Other (please specify):</i><br><i>e.g. flu like symptoms</i> |                          |

#### 7. Do you expect to receive from the doctor (please tick all that apply):

|                                           |                          |
|-------------------------------------------|--------------------------|
| <i>Further examination</i>                | <input type="checkbox"/> |
| <i>Information</i>                        | <input type="checkbox"/> |
| <i>Reassurance</i>                        | <input type="checkbox"/> |
| <i>Medication for pain relief</i>         | <input type="checkbox"/> |
| <i>Nose drops</i>                         | <input type="checkbox"/> |
| <i>Medication for cough</i>               | <input type="checkbox"/> |
| <i>Referral to hospital or specialist</i> | <input type="checkbox"/> |
| <i>Other (please specify):</i>            |                          |

8. We may wish to contact you to discuss your experience in more detail as part of a follow up study. If you are happy to be contacted for this purpose then please provide your details below (please print):

Name: \_\_\_\_\_

Address: \_\_\_\_\_

Contact Telephone Number/Email: \_\_\_\_\_

**Please hand your completed questionnaire to the receptionist**



1  
2  
3 **1 SUPPLEMENTARY MATERIAL: AGE AND GENDER COMPARISON OF OUR**  
4  
5 **2 SAMPLE WITH THOSE ATTENDING SHANNONDOC FACILITY DURING THE**  
6  
7 **3 STUDY PERIOD**  
8  
9  
10  
11  
12  
13

14 **5 Table A: Gender Proportion of those attending OOH Facility with ARTI symptoms**  
15

|                             |        | <b>Shannondoc Dooradoyle*</b><br><b>(n=1715)</b> | <b>GEMS</b><br><b>(n=435)</b> |
|-----------------------------|--------|--------------------------------------------------|-------------------------------|
| Gender                      | Male   | 783 (39.4)                                       | 176 (40.5)                    |
|                             | Female | 1205 (60.1)                                      | 259 (59.5)                    |
| *1988 with resp. complaints |        |                                                  |                               |
| Counts (%) presented        |        |                                                  |                               |

16  
17  
18  
19  
20  
21  
22  
23  
24  
25  
26  
27  
28  
29  
30  
31 **6 Shannondoc Dooradoyle\*:** This number refers to the population who attended the  
32  
33 **7 ‘Shannondoc’ Dooradoyle out of hours centre, where the study took place, during the study**  
34  
35 **8 period.**  
36  
37  
38  
39  
40

41 **10 Table B: Age of those attending OOH Facility overall during the study period**  
42  
43

| <b>Shannondoc OOH Facility** (n=11,455)</b> |             |             |
|---------------------------------------------|-------------|-------------|
| <b>Age</b>                                  | <b>0-4</b>  | 4706 (41.1) |
|                                             | <b>5-64</b> | 5208 (45.5) |
|                                             | <b>65+</b>  | 1541 (13.4) |
| <b>UL Antibiotic Study (n=435)</b>          |             |             |
| <b>Age</b>                                  | <b>0-6</b>  | 186 (42.7)  |
|                                             | <b>7-55</b> |             |

|                       |            |            |
|-----------------------|------------|------------|
|                       |            | 226 (51.9) |
|                       | <b>56+</b> | 23 (5.3)   |
| Counts (%) presented. |            |            |

11 **Shannondoc OOH Facility\*\***: This number refers to the entire population of patients who  
 12 attended all 'Shannondoc' out of hours centres during the study period.

13

14 **Table C: Eligibility for free care**

|                               |     | <b>Shannondoc OOH Facility<br/>(Total=11,455)</b> | <b>UL Antibiotic Study<br/>(Total=435)</b> |
|-------------------------------|-----|---------------------------------------------------|--------------------------------------------|
| <b>Eligible for Free Care</b> | Yes | 8477 (74)                                         | 244 (56)                                   |
|                               | No  | 2978 (26)                                         | 191 (44)                                   |
| Counts (%) presented          |     |                                                   |                                            |

15

16 **Table D: Patient expectation for antibiotics for ARTI over the last 20 years.**

| <b>Study</b>  | <b>Year</b> | <b>Location</b> | <b>Patient Expectation<br/>For Antibiotic for ARTI</b> |
|---------------|-------------|-----------------|--------------------------------------------------------|
| Hamm          | 1996        | USA             | 65%                                                    |
| Shlomo Vinker | 2003        | Israel          | 25%                                                    |
| Martin        | 2004        | USA             | 76%                                                    |
| Soma          | 2005        | Norway          | 38%                                                    |

|               |      |           |     |
|---------------|------|-----------|-----|
| Panagakau     | 2011 | Greece    | 74% |
| McNulty       | 2013 | UK        | 53% |
| Zyoud         | 2015 | Palestine | 73% |
| Wong          | 2017 | China     | 10% |
| UL/Shannondoc | 2018 | Ireland   | 34% |

17

18

## STROBE 2007 (v4) Statement—Checklist of items that should be included in reports of cross-sectional studies

| Section/Topic                | Item # | Recommendation                                                                                                                                                                       | Reported on page # |
|------------------------------|--------|--------------------------------------------------------------------------------------------------------------------------------------------------------------------------------------|--------------------|
| Title and abstract           | 1      | (a) Indicate the study's design with a commonly used term in the title or the abstract                                                                                               | 1                  |
|                              |        | (b) Provide in the abstract an informative and balanced summary of what was done and what was found                                                                                  | 3+4                |
| <b>Introduction</b>          |        |                                                                                                                                                                                      |                    |
| Background/rationale         | 2      | Explain the scientific background and rationale for the investigation being reported                                                                                                 | 5-7                |
| Objectives                   | 3      | State specific objectives, including any prespecified hypotheses                                                                                                                     | 7                  |
| <b>Methods</b>               |        |                                                                                                                                                                                      |                    |
| Study design                 | 4      | Present key elements of study design early in the paper                                                                                                                              | 7                  |
| Setting                      | 5      | Describe the setting, locations, and relevant dates, including periods of recruitment, exposure, follow-up, and data collection                                                      | 7                  |
| Participants                 | 6      | (a) Give the eligibility criteria, and the sources and methods of selection of participants                                                                                          | 8                  |
| Variables                    | 7      | *Clearly define all outcomes, exposures, predictors, potential confounders, and effect modifiers. Give diagnostic criteria, if applicable                                            | 8-9                |
| Data sources/<br>measurement | 8*     | For each variable of interest, give sources of data and details of methods of assessment (measurement). Describe comparability of assessment methods if there is more than one group | 8-9                |
| Bias                         | 9      | Describe any efforts to address potential sources of bias                                                                                                                            | N/A                |
| Study size                   | 10     | Explain how the study size was arrived at                                                                                                                                            | 8                  |
| Quantitative variables       | 11     | Explain how quantitative variables were handled in the analyses. If applicable, describe which groupings were chosen and why                                                         | 9                  |
| Statistical methods          | 12     | (a) Describe all statistical methods, including those used to control for confounding                                                                                                | 9                  |
|                              |        | (b) Describe any methods used to examine subgroups and interactions                                                                                                                  | N/A                |
|                              |        | (c) Explain how missing data were addressed                                                                                                                                          | N/A                |
|                              |        | (d) If applicable, describe analytical methods taking account of sampling strategy                                                                                                   | N/A                |
|                              |        | (e) Describe any sensitivity analyses                                                                                                                                                | N/A                |
| <b>Results</b>               |        |                                                                                                                                                                                      |                    |

|                   |     |                                                                                                                                                                                                                                                                                                                                                                                                               |                       |
|-------------------|-----|---------------------------------------------------------------------------------------------------------------------------------------------------------------------------------------------------------------------------------------------------------------------------------------------------------------------------------------------------------------------------------------------------------------|-----------------------|
| Participants      | 13* | (a) Report numbers of individuals at each stage of study—eg numbers potentially eligible, examined for eligibility, confirmed eligible, included in the study, completing follow-up, and analysed<br>(b) Give reasons for non-participation at each stage<br>(c) Consider use of a flow diagram                                                                                                               | 10                    |
| Descriptive data  | 14* | (a) Give characteristics of study participants (eg demographic, clinical, social) and information on exposures and potential confounders<br>(b) Indicate number of participants with missing data for each variable of interest                                                                                                                                                                               | 10<br>N/A             |
| Outcome data      | 15* | Report numbers of outcome events or summary measures                                                                                                                                                                                                                                                                                                                                                          | N/A<br>11-12          |
| Main results      | 16  | (a) Give unadjusted estimates and, if applicable, confounder-adjusted estimates and their precision (eg, 95% confidence interval). Make clear which confounders were adjusted for and why they were included<br>(b) Report category boundaries when continuous variables were categorized<br>(c) If relevant, consider translating estimates of relative risk into absolute risk for a meaningful time period | 11-12<br>10-14<br>N/A |
| Other analyses    | 17  | Report other analyses done—eg analyses of subgroups and interactions, and sensitivity analyses                                                                                                                                                                                                                                                                                                                | <del>12-14</del>      |
| Discussion        |     |                                                                                                                                                                                                                                                                                                                                                                                                               |                       |
| Key results       | 18  | Summarise key results with reference to study objectives                                                                                                                                                                                                                                                                                                                                                      | 14-18                 |
| Limitations       | 19  | Discuss limitations of the study, taking into account sources of potential bias or imprecision. Discuss both direction and magnitude of any potential bias                                                                                                                                                                                                                                                    | 18                    |
| Interpretation    | 20  | Give a cautious overall interpretation of results considering objectives, limitations, multiplicity of analyses, results from similar studies, and other relevant evidence                                                                                                                                                                                                                                    | 14-18                 |
| Generalisability  | 21  | Discuss the generalisability (external validity) of the study results                                                                                                                                                                                                                                                                                                                                         | 18-19                 |
| Other information |     |                                                                                                                                                                                                                                                                                                                                                                                                               |                       |
| Funding           | 22  | Give the source of funding and the role of the funders for the present study and, if applicable, for the original study on which the present article is based                                                                                                                                                                                                                                                 | 20                    |

\*Give information separately for cases and controls in case-control studies and, if applicable, for exposed and unexposed groups in cohort and cross-sectional studies.

Note: An Explanation and Elaboration article discusses each checklist item and gives methodological background and published examples of transparent reporting. The STROBE checklist is best used in conjunction with this article (freely available on the Web sites of PLOS Medicine at <http://www.plosmedicine.org/>, Annals of Internal Medicine at <http://www.annals.org/>, and Epidemiology at <http://www.epidem.com/>). Information on the STROBE Initiative is available at [www.strobe-statement.org](http://www.strobe-statement.org).

1  
2  
3  
4  
5  
6  
7  
8  
9  
10  
11  
12  
13  
14  
15  
16  
17  
18  
19  
20  
21  
22  
23  
24  
25  
26  
27  
28  
29  
30  
31  
32  
33  
34  
35  
36  
37  
38  
39  
40  
41  
42  
43  
44  
45  
46  
47  
48  
49  
50  
51  
52  
53  
54  
55  
56  
57  
58  
59  
60

# BMJ Open

## Medical Management of Acute Upper Respiratory Infections in an Urban Primary Care Out of Hours Facility; Cross Sectional Study of Patient Presentations and Expectations

|                                 |                                                                                                                                                                                                                                                                                                                                                                                                                                                                                                                   |
|---------------------------------|-------------------------------------------------------------------------------------------------------------------------------------------------------------------------------------------------------------------------------------------------------------------------------------------------------------------------------------------------------------------------------------------------------------------------------------------------------------------------------------------------------------------|
| Journal:                        | <i>BMJ Open</i>                                                                                                                                                                                                                                                                                                                                                                                                                                                                                                   |
| Manuscript ID                   | bmjopen-2018-025396.R2                                                                                                                                                                                                                                                                                                                                                                                                                                                                                            |
| Article Type:                   | Research                                                                                                                                                                                                                                                                                                                                                                                                                                                                                                          |
| Date Submitted by the Author:   | 12-Dec-2018                                                                                                                                                                                                                                                                                                                                                                                                                                                                                                       |
| Complete List of Authors:       | O'Connor, Raymond; University of Limerick Faculty of Education and Health Sciences, Graduate Entry Medical School<br>O'Doherty, Jane; University of Limerick Faculty of Education and Health Sciences, Graduate Entry Medical School<br>O'Regan, Andrew; University of Limerick Faculty of Education and Health Sciences, Graduate Entry Medical School<br>O'Neill, Aoife; University of Limerick, Mathematics and Statistics<br>McMahon, Claire; Shannondoc Out of Hours GP Service<br>Dunne, C.; Univ Limerick, |
| <b>Primary Subject Heading</b>: | General practice / Family practice                                                                                                                                                                                                                                                                                                                                                                                                                                                                                |
| Secondary Subject Heading:      | Infectious diseases                                                                                                                                                                                                                                                                                                                                                                                                                                                                                               |
| Keywords:                       | out-of-hours, upper respiratory tract infection, antibacterial agent, patient expectations, antibiotic prescription                                                                                                                                                                                                                                                                                                                                                                                               |
|                                 |                                                                                                                                                                                                                                                                                                                                                                                                                                                                                                                   |

SCHOLARONE™  
Manuscripts

1  
2  
3 1 Medical Management of Acute Upper Respiratory Infections in an Urban Primary Care  
4  
5 2 Out of Hours Facility; Cross Sectional Study of Patient Presentations and Expectations  
6  
7

8 3 Authors  
9

10  
11 4 Raymond O'Connor  
12

13  
14 5 Jane O'Doherty  
15

16  
17 6 Andrew O'Regan  
18

19  
20 7 Aoife O'Neill<sup>4</sup>  
21

22  
23 8 Claire McMahon  
24

25  
26 9 Colum Dunne<sup>6</sup>  
27

28  
29 10  
30

31  
32 11 <sup>1</sup>Corresponding author: Dr. Raymond O'Connor  
33

34  
35 12 Senior Research Fellow, Graduate Entry Medical School, University of Limerick, Ireland  
36

37  
38 13 Email: [Raymond.OConnor@ul.ie](mailto:Raymond.OConnor@ul.ie)  
39

40  
41 14 Telephone: 061234851  
42

43  
44 15  
45

46  
47 16 <sup>2</sup>Ms. Jane O'Doherty  
48

49  
50 17 Research Assistant, Graduate Entry Medical School, University of Limerick, Ireland  
51

52  
53 18 Email: [Jane.ODoherty@ul.ie](mailto:Jane.ODoherty@ul.ie)  
54

55  
56 19  
57

58  
59 20 <sup>3</sup>Dr. Andrew O'Regan  
60

1  
2  
3 21 Senior Lecturer in General Practice, Graduate Entry Medical School, University of Limerick,  
4

5 22 Ireland  
6  
7

8 23 Email: [Andrew.OREgan@ul.ie](mailto:Andrew.OREgan@ul.ie)  
9  
10

11 24  
12  
13

14 25 <sup>4</sup>Ms Aoife O'Neill  
15

16  
17 26 PhD Candidate, Department of Mathematics and Statistics, University of Limerick, Ireland  
18  
19

20 27 Email: [Aoife.ONeill@ul.ie](mailto:Aoife.ONeill@ul.ie)  
21  
22

23 28  
24  
25

26 29 <sup>5</sup>Claire McMahon  
27

28  
29 30 Clinical Quality Manager,  
30

31 31 Shannondoc Out of Hours General Practice Service, Shelbourne Rd., Limerick Ireland  
32  
33

34 32 Email: [clairemcmahon@shannondoc.ie](mailto:clairemcmahon@shannondoc.ie)  
35  
36

37 33  
38

39 34 Prof. Colum Dunne  
40

41 35 Director of Research (GEMS) & Founding Director of Centre for Interventions in Infection,  
42  
43

44 36 Inflammation & Immunity (41), Graduate Entry Medical School, University of Limerick,  
45  
46

47 37 Ireland  
48

49 38 Email: [Colum.Dunne@ul.ie](mailto:Colum.Dunne@ul.ie)  
50  
51

52 39  
53  
54

55 40  
56  
57

58 41  
59  
60



1  
2  
3 42 Abstract  
4  
5

6 43 Objectives: The purpose of this study was to examine the expectations of patients attending  
7  
8 44 an urban primary care out of hours facility with acute upper respiratory tract infection (acute  
9  
10 45 URTI) regarding clinical examination, symptom management, information on their condition,  
11  
12  
13 46 reassurance, antibiotic treatment and other possible options including referral  
14

15  
16 47 Design: Cross-sectional design  
17

18  
19 48 Setting: One urban primary care out of hours facility located in the Mid-West of Ireland.  
20

21  
22 49 Participants: 457 patients filled out a questionnaire while waiting in the out of hours facility,  
23  
24 50 22 surveys were excluded as the patients did not present with symptoms of acute URTI  
25  
26 51 resulting in 435 patients' data being included in this study. There were 59.5% female  
27  
28 52 participants and 40.5% male participants.  
29

30  
31  
32 53 Results: 435 patients with acute URTI symptoms participated in the survey, representing  
33  
34 54 25.4% of those attending the single branch where the survey was conducted (n=1715). Of the  
35  
36 55 study participants, 43% were aged under six years and 60% were female. The most common  
37  
38 56 presenting symptoms were cough (72%), throat ache (46%) and common cold (26%). The  
39  
40 57 most common expectations were for further examination (53%), reassurance (51%),  
41  
42 58 information (49%) and medication for cough (47%), with 34% expecting an antibiotic.  
43  
44  
45

46 59 Conclusions: Only one in three patients attending this primary care OOH facility with acute  
47  
48 60 URTI symptoms had an expectation of antibiotics, with most seeking further assessment,  
49  
50 61 information and reassurance. Recognition of such expectations may be important  
51  
52 62 considerations for clinicians when deciding on management options for acute URTI patients.  
53  
54  
55

56 63 Word Count: 3680  
57

58  
59 64 Strengths and limitations of this study.  
60

1  
2  
3 65 The study used a previously validated questionnaire that was adapted and piloted by a  
4  
5 66 multi-disciplinary research and clinical team.  
6  
7

8  
9 67 The research was conducted over four consecutive months which would mitigate the  
10  
11 68 effects of any public health campaigns aimed at reducing antibiotic use at the time.  
12  
13

14 69 As this is a single centre study, the population studied in this particular OOH service  
15  
16 70 may not reflect those seen in OOH services throughout Ireland and/or the UK  
17

18 71 The patient's desire for antibiotics was not assessed against the clinician-assessed  
19  
20 72 need for antibiotics. Severity and duration of the illness was not assessed which may  
21  
22 73 have affected patient expectation for antibiotics.  
23  
24  
25

26 74  
27  
28

29 75  
30  
31

32 76  
33  
34

35 77  
36  
37

38 78  
39  
40

41 79  
42  
43

44 80  
45  
46

47 81  
48  
49

50 82  
51  
52

53 83  
54  
55

56 84  
57  
58

59 85  
60

86

|    |     |
|----|-----|
| 1  |     |
| 2  |     |
| 3  | 87  |
| 4  |     |
| 5  |     |
| 6  | 88  |
| 7  |     |
| 8  |     |
| 9  | 89  |
| 10 |     |
| 11 |     |
| 12 | 90  |
| 13 |     |
| 14 |     |
| 15 | 91  |
| 16 |     |
| 17 |     |
| 18 | 92  |
| 19 |     |
| 20 |     |
| 21 | 93  |
| 22 |     |
| 23 |     |
| 24 | 94  |
| 25 |     |
| 26 |     |
| 27 | 95  |
| 28 |     |
| 29 |     |
| 30 | 96  |
| 31 |     |
| 32 |     |
| 33 | 97  |
| 34 |     |
| 35 |     |
| 36 | 98  |
| 37 |     |
| 38 |     |
| 39 | 99  |
| 40 |     |
| 41 |     |
| 42 | 100 |
| 43 |     |
| 44 |     |
| 45 | 101 |
| 46 |     |
| 47 |     |
| 48 | 102 |
| 49 |     |
| 50 |     |
| 51 | 103 |
| 52 |     |
| 53 |     |
| 54 | 104 |
| 55 |     |
| 56 |     |
| 57 | 105 |
| 58 |     |
| 59 |     |
| 60 | 106 |

For peer review only

1  
2  
3 107  
4  
5  
6 108  
7  
8  
9 109  
10  
11  
12 110 BACKGROUND  
13  
14  
15 111 Antimicrobial resistance (AMR) is a growing threat to global public health [1]. Increasing  
16  
17 112 consumption of antibiotics is associated with the development of antibiotic resistance at  
18  
19 113 individual, community, national and international levels [2-5]. It is estimated that 25,000  
20  
21 114 people in the EU die annually as a result of infections caused by resistant bacteria, at a  
22  
23 115 societal cost of approximately €1.5 billion annually [6]. Over the last 30 years, no major new  
24  
25 116 types of antibiotics have been developed [7]. Therefore, antibiotic stewardship programmes,  
26  
27 117 aiming to ensure the judicious use of antimicrobials by preventing their unnecessary use,  
28  
29 118 have been established [1, 8-12].  
30  
31  
32  
33  
34 119 Acute upper respiratory tract infection (acute URTI), which incorporates the term “upper  
35  
36 120 respiratory infection” (URTI), includes infections such as otitis media, pharyngitis, sinusitis and  
37  
38 121 acute bronchitis [13]. It is the most common reason for antibiotic prescription in adults [13]  
39  
40 122 and children [14]. These prescriptions are often inappropriate in that they may be  
41  
42 123 unnecessary, lead to increased antibiotic resistance and put patients at risk of adverse events  
43  
44 124 [13]. Typically, inappropriate antibiotic prescribing occurs when a doctor prescribes an  
45  
46 125 antibiotic that is not clinically indicated. The benefits of antibiotics are marginal for the  
47  
48 126 management of most cases of acute URTI [15-22], including sore throat [23, 24].  
49  
50  
51 127 Internationally, research shows that, with few exceptions [25], inappropriate prescribing of  
52  
53 128 antibiotics for patients with mainly acute URTI is common [26-30]. This is thought to be  
54  
55 129 related to a poor standard of knowledge among the general public regarding the usefulness of  
56  
57  
58  
59  
60

1  
2  
3 130 antibiotics in acute URTI, with widespread belief that antibiotics work well for treating viral  
4  
5 131 infections [31, 32].  
6  
7

8 132 It has been reported that 75% of overall antibiotic prescribing takes place in primary care  
9  
10 133 [33]. For example, the majority of outpatient antibiotic prescriptions in the USA are for acute  
11  
12 134 URTIs [13, 34]. In Ireland, the UK and many other countries, out of hours (OOH) services  
13  
14 135 are an integral part of primary care provision, providing primary care outside of 'core'  
15  
16 136 contracted hours during weekday evenings and nights and on weekends or bank holidays.  
17  
18 137 This care is usually for clinical cases that are deemed to be of sufficiently urgent nature that  
19  
20 138 they cannot wait until the next available routine consulting period. Internationally, acute  
21  
22 139 URTIs are estimated to constitute 9% of the consultations in general practice, while the  
23  
24 140 corresponding proportion in the OOH service is 16.7% [35]. Hence, this service handles a  
25  
26 141 substantial proportion of acute URTIs and is, thereby, potentially an important contributor to  
27  
28 142 overall antibiotic consumption.  
29  
30  
31  
32  
33

34 143 Patterns of antibiotic prescribing that clearly do not adhere to guidelines have been reported  
35  
36 144 [36, 37]. In some regions, this has contributed to a 25% rate of antibiotic prescribing for  
37  
38 145 children with fever in an OOH setting [38]. Giesen described how national clinical guidelines  
39  
40 146 are not suited to the context of the OOH setting leading to clinical uncertainty for doctors  
41  
42 147 [39]. This has resulted in quality of antibiotic prescribing being less than optimal [40]. Trends  
43  
44 148 in prescribing have also suggested that there may be a partial displacement of antibiotic  
45  
46 149 prescribing from in-hours to the OOH setting, where patients with acute infective symptoms  
47  
48 150 seeking antibiotics present to the OOH service after refusal by the in-hours general practice  
49  
50 151 [41]. In contrast, other studies have shown antibiotic prescription rates to be similar in the  
51  
52 152 OOH setting compared with the daytime in-hours setting [35, 42].  
53  
54  
55  
56  
57

58 153  
59  
60

1  
2  
3 154 While it is true that poor public understanding of the usefulness of antibiotics in acute URTI  
4  
5 155 may increase patient expectation for antibiotic prescription, there is evidence that clinical  
6  
7 156 examination and explanation of the diagnosis is important to patients' satisfaction with the  
8  
9 157 consultation [43]. It has also been shown that taking a patient's concerns seriously,  
10  
11 158 conducting a physical examination, communicating a treatment plan and explaining treatment  
12  
13 159 decisions all increase patient satisfaction with the management of acute URTI [44].  
14  
15

16  
17 160 One of the most important factors influencing doctors prescribing of antibiotics for acute  
18  
19 161 URTI is patient expectation [45-59]. However, doctors often overestimate the level of this  
20  
21 162 expectation [54, 60-63].  
22  
23

24  
25 163 Hence, there is an important need to determine what patients presenting to an OOH centre  
26  
27 164 with acute URTI symptoms are expecting from their consultation with the healthcare  
28  
29 165 professional (HCP). The purpose of this study was to examine patients' expectations of  
30  
31 166 clinical examination, symptom management, information on their condition, reassurance,  
32  
33 167 antibiotic treatment and other possible options including referral. This insight into patient  
34  
35 168 expectation will inform HCPs dealing with patients presenting with acute URTI in an OOH  
36  
37 169 setting.  
38  
39

40  
41  
42 170

## 43 44 45 171 METHODS

### 46 47 48 172 Study Setting

49  
50 173 The 'Shannondoc' primary care OOH facility (hereinafter referred to as 'the OOH facility')  
51  
52 174 in Limerick City, in the Mid-West of Ireland is the regional primary care setting for treating  
53  
54 175 patients between the hours of 6 pm to 8 am on weekdays and at all hours over weekends. The  
55  
56 176 OOH facility has 12 branches throughout the region. It has a mixed private-public system  
57  
58 177 with 45% of the population eligible for free care under a means-tested General Medical  
59  
60

1  
2  
3 178 Services (GMS) card or doctor visit only card which is issued by the Irish Health Service  
4  
5 179 Executive [64]. Eligibility criteria for free medical care include: age under six or over 70  
6  
7 180 years; or earning below a certain figure based on family size. This group is hereinafter  
8  
9 181 referred to as those eligible for free care. GPs (general practitioners) (who are self-employed)  
10  
11 182 are paid a 'per capita' fee by the state for their care. These patients do not pay directly for  
12  
13 183 GP consultations whereas patients without a card pay an average of €55 per consultation.  
14  
15

#### 16 17 18 184 Participants

19  
20 185 Each day reception staff distributed the paper-based questionnaires along with information  
21  
22 186 and consent forms to patients in the waiting room, prior to their consultation. The trained  
23  
24 187 reception staff are experienced at working in a supervised clinical setting out of hours. Only  
25  
26 188 patients attending with symptoms of acute URTI were invited to participate in the study. For  
27  
28 189 those aged under 18 years, parents or guardians were asked to complete the questionnaire.  
29  
30 190 Reception staff were briefed by a member of the research team (ROC) on the aims of the  
31  
32 191 study and given a list of acute URTI symptoms. All questionnaires were completed at the  
33  
34 192 OOH facility. Completed forms were securely stored in the University of Limerick Graduate  
35  
36 193 Entry Medical School building.  
37  
38  
39  
40  
41

42 194

#### 43 44 45 195 Sample Size

46  
47 196 It was calculated that a random sample of 400 patients would be required to estimate the  
48  
49 197 percentage of patients expecting a prescription for antibiotics with 95% confidence and a  
50  
51 198 margin of error of 5%. While our sample is not randomly selected, this sample size  
52  
53 199 calculation was used to guide recruitment.  
54  
55  
56

#### 57 58 200 Measures

59  
60

1  
2  
3 201 The questionnaire used was adapted from an instrument used by a recent study of patient  
4  
5 202 experiences of antibiotic prescribing by non-medical practitioners [44]. The modifications  
6  
7 203 made to the original instrument were: eliminating the post consultation element which asked  
8  
9 204 patients what treatment they were given and ranking their satisfaction with various aspects of  
10  
11 205 the consultation. All patients provided information regarding their age, gender, eligibility for  
12  
13 206 free care and whether this was their first consultation with their GP or the OOH facility for  
14  
15 207 the current complaint.

16  
17  
18  
19  
20 208 Other data collected included:

- 21  
22  
23 209 • Expecting antibiotics: Yes, no, unsure  
24  
25  
26 210 • Reasons for seeing the GP: Earache or ear discharge, complaints of nose/sinuses,  
27  
28 211 common cold, throat ache, cough, other reasons e.g. flu like symptoms  
29  
30  
31 212 • What did they expect to receive from the GP: Further examination, information,  
32  
33 213 reassurance, medication for pain relief, nose drops, medication for cough, referral to hospital  
34  
35 214 or specialist, other

36  
37  
38  
39 215 The modified questionnaire was piloted among non-medical staff and students in the medical  
40  
41 216 school who were not associated with the study to ensure face validity (see appendix 1).

42  
43 217 Completed questionnaires were de-identified for storage where patients had entered  
44  
45 218 identifying data on the questionnaire during its completion.

46  
47  
48  
49 219

50  
51 220 Data analysis

52  
53  
54 221 Descriptive statistics were used to explore the demographic profile, patient symptoms and  
55  
56 222 patient expectations. Variables were summarized using graphical and numeric descriptive  
57  
58 223 statistics. Categorical variables were described using counts and percentages. The  
59  
60



1  
2  
3 224 demographic characteristics of the sample and known characteristics of the population  
4  
5 225 attending the OOH facility with acute URTI symptoms were compared. The percentage of the  
6  
7 226 sample with an expectation of antibiotics was calculated with a 95% confidence interval. The  
8  
9 227 difference and corresponding 95% confidence interval for the difference between two  
10  
11 228 independent proportions (expectation of antibiotics by gender, age group, eligibility for free  
12  
13 229 care and first consultation) was calculated. The Z test for independent proportions was used  
14  
15 230 to investigate differences between proportions. SPSS Version 24 and R software were used  
16  
17 231 for the statistical analysis. Ethical approval for the study was granted by the Health Service  
18  
19 232 Executive Mid-West Research Ethics Committee reference number 068/17.  
20  
21  
22  
23  
24  
25 233

#### 26 27 234 Patient and Public Involvement

28  
29  
30 235 Patients were not involved in the design of the study. Patient data was collected but no  
31  
32 236 identifying data was included in this study. Patients were recruited by staff at the out of hours  
33  
34 237 service based on their physical symptoms of acute URTI. Patients will be able to view the  
35  
36 238 results of this study when it is published in a peer reviewed journal.  
37  
38  
39

40 239

## 41 42 43 240 RESULTS

### 44 45 46 241 Patient characteristics

47  
48  
49 242 A total of 457 questionnaires were collected during the time period of the study. When  
50  
51 243 reviewing the data, 22 questionnaires were excluded as patients presented with non-acute  
52  
53 244 URTI symptoms. This yielded a total of 435 questionnaires related to patients with symptoms  
54  
55 245 of acute URTI. This sample represents one in four of the 1715 patients with acute URTI who  
56  
57 246 attended this treatment centre from October 2017-February 2018 and 3.8% of the 11,455  
58  
59  
60

247 face-to-face consultations for acute URTI at all treatment centres of the OOH service in the  
 248 region during the same period. Patient characteristics and pre-consultation expectation for  
 249 antibiotic treatment are summarised in Table 1.

250 The majority of the sample was female (60%) and over half (56%) were eligible for free care.  
 251 The most common age group was under six years of age (43%). Two hundred and twenty-one  
 252 respondents (50.8%) indicated that this was not their first consultation for this illness. The  
 253 demographic characteristics of the sample and known characteristics of the population  
 254 attending the OOH facility with acute URTI symptoms are presented in Supplementary  
 255 Material (Tables A, B and C). Compared to the demographic characteristics of the population  
 256 attending the OOH facility with acute URTI, patients who were eligible for free care were  
 257 under-represented in the sample (56% vs 74%). The age and gender profile of our sample  
 258 compared to the OOH facility was similar (see Supplementary Material; Tables A, B and C).  
 259 Older people (over the age of 56 years) are poorly represented in our sample, making up only  
 260 5.3% of the population studied.

262 Table 1: Patient characteristics and pre-consultation expectations of antibiotics (n=435)

| Patient Characteristics and pre-consultation antibiotic expectations | n (%)      |
|----------------------------------------------------------------------|------------|
| Gender                                                               |            |
| Male                                                                 | 176 (40.5) |
| Female                                                               | 259 (59.5) |
| Age (Years)                                                          |            |
| Under 6                                                              | 186 (42.8) |

|                                               |            |
|-----------------------------------------------|------------|
| 6-25                                          | 130 (29.9) |
| 25-55                                         | 96 (22.1)  |
| 56+                                           | 23 (5.3)   |
| Eligibility for Free Care                     |            |
| Yes                                           | 244 (56.1) |
| No                                            | 191 (43.9) |
| First medical consultation for this complaint |            |
| Yes                                           | 214 (49.2) |
| No                                            | 221 (50.8) |
| Expecting Antibiotics Pre Consultation        |            |
| Yes                                           | 149 (34.3) |
| No                                            | 45 (10.3)  |
| Unsure                                        | 241 (55.4) |

263

## 264 Presenting Symptoms

265 Patients presented with varying symptoms; many of them reported multiple symptoms.

266 Cough was the most common (72%), followed by throat ache (46%). The least common  
 267 symptoms included earache or discharge (15%) and complaints of nose/sinuses (24.1%).

268 These symptoms are displayed in Table 2.

269

## 270 Patient Expectations

271 Patient expectations for each symptom are illustrated in figure 1 and described in table 2.

272 Table 2 also gives the overall expectation for each potential response of the HCP. The most  
 273 commonly expressed expectations were for further examination (53%), reassurance (51%),

1  
2  
3 274 information (49%) and medication for cough (47%). Patients least expected to receive nose  
4  
5 275 drops (5%) or a referral to hospital or specialist (3%). Thirty four percent (95% CI = 30%,  
6  
7 276 39%) of patients expected to receive an antibiotic, 10% (95% CI = 8%, 14%) did not expect  
8  
9 277 to receive and antibiotic and the majority (55%, 95% CI = 50%, 60%) were unsure whether  
10  
11 278 they would need an antibiotic or not (Table 1).

12  
13  
14  
15 279 We explored all the differences between expectation of antibiotics by age group, gender,  
16  
17 280 eligibility for free care and whether or not this was the patient's first consultation for this  
18  
19 281 illness. The results are presented in supplementary table D.

20  
21  
22  
23 282 Males were more likely to not expect antibiotics (16%) compared to 7% of females  
24  
25 283 (difference 9%, 95% CI for the difference 3% to 16%,  $p=0.002$ ). While those eligible for free  
26  
27 284 care were more likely to expect antibiotics (38%) compared to those who were not eligible  
28  
29 285 (30%), the difference was not statistically significant (difference 4%, 95% CI for the  
30  
31 286 difference -1% to 17%,  $p=0.09$ ). Patient's receiving a subsequent consultation were more  
32  
33 287 likely to expect an antibiotic (37%) compared to 31% receiving their first consultation,  
34  
35 288 however this difference was not statistically significant (difference 6%, 95% CI for the  
36  
37 289 difference = -3% to 15%,  $p=0.20$ ). No significant patterns were observed in the expectation  
38  
39 290 of antibiotics by age group (Supplementary Table D).

40  
41  
42  
43  
44 291

45  
46  
47 292 Figure 1: Patient Overall Expectations

48  
49  
50 293

51  
52  
53 294 Differences between patient expectation, expecting an antibiotic and symptom presented  
54  
55  
56 295 Patient expectations for each symptom are described in Table 2. For each symptom  
57  
58 296 presented, patient expectations of further examination, information or reassurance were  
59  
60

297 similar, with approximately half those who presented with each symptom reporting an  
 298 expectation to receive these treatments. A large proportion of patients presenting with  
 299 symptoms of an earache (67%) or cough (65%) reported expecting to receive pain relief. A  
 300 large proportion of patients presenting with sinusitis (60%) or cough (62%) symptoms  
 301 reported expecting to receive cough medication.

302 Table 2: Patient expectations for each symptom

| Symptom*                      | Patient Expectation |               |               |               |              |                |             |
|-------------------------------|---------------------|---------------|---------------|---------------|--------------|----------------|-------------|
|                               | Further Exam        | Info          | Reassure      | Pain relief   | Nose Drops   | Cough Medicine | Referral    |
| Earache<br>(n=64, 14.7%)      | 39<br>(60.9)        | 34<br>(53.1)  | 30<br>(46.9)  | 43<br>(67.2)  | 6<br>(9.4)   | 23<br>(35.9)   | 0<br>(0.0)  |
| Sinuses<br>(n=105, 24.1%)     | 53<br>(50.5)        | 56<br>(53.3)  | 53<br>(50.5)  | 47<br>(44.8)  | 14<br>(13.3) | 63<br>(60.0)   | 5<br>(4.8)  |
| Common cold<br>(n=114, 26.2%) | 64<br>(56.1)        | 54<br>(47.4)  | 62<br>(54.4)  | 53<br>(46.5)  | 10<br>(8.8)  | 64<br>(56.1)   | 5<br>(4.4)  |
| Throat Ache<br>(n=202, 46.4%) | 104<br>(51.5)       | 99<br>(49.0)  | 96<br>(47.5)  | 115<br>(56.9) | 13<br>(6.4)  | 101<br>(50.0)  | 8<br>(4.0)  |
| Cough<br>(n=314, 72.2%)       | 164<br>(52.2)       | 159<br>(50.6) | 161<br>(51.3) | 109<br>(34.7) | 19<br>(6.1)  | 195<br>(62.1)  | 12<br>(3.8) |
| Other<br>(n=169, 38.9%)       | 104<br>(61.5)       | 99<br>(58.6)  | 119<br>(70.4) | 59<br>(34.9)  | 9<br>(5.3)   | 64<br>(37.9)   | 8<br>(4.7)  |
| Overall expectation**         | 528                 | 501           | 521           | 426           | 71           | 510            | 38          |
| Counts (%) presented.         |                     |               |               |               |              |                |             |

\*Represents those who presented with symptom (yes response)

\*\* As many patients presented with multiple symptoms, the count exceeds the number of patients surveyed

303  
304 Table 3 presents differences in antibiotic expectations. Patients presenting with symptoms of  
305 an earache (44%) or throat ache (39%) were most likely to expect antibiotics. The majority of  
306 patients across all symptoms were 'unsure' whether they would require antibiotics.

307 Table 3: Antibiotic expectations of those presenting with different symptoms

| Symptoms*                            | Patients expecting an antibiotic |                     |                          |
|--------------------------------------|----------------------------------|---------------------|--------------------------|
|                                      | Yes<br>(n=149, 34.3%)            | No<br>(n=45, 10.3%) | Unsure<br>(n=241, 55.4%) |
| Earache or discharge:<br>(15%)       | 64<br>28 (43.8)                  | 6 (9.4)             | 30 (46.9)                |
| Complaints of nose/sinuses:<br>(24%) | 105<br>35 (33.3)                 | 10 (9.5)            | 60 (57.1)                |
| Common cold:<br>(26%)                | 114<br>43 (37.7)                 | 8 (7.0)             | 63 (55.3)                |
| Throat Ache:<br>(46%)                | 202<br>79 (39.1)                 | 12 (5.9)            | 111 (55.0)               |
| Cough:<br>(72%)                      | 314<br>100 (31.8)                | 31 (9.9)            | 183 (58.3)               |
| Other:<br>(39%)                      | 169<br>44 (26.0)                 | 25 (14.8)           | 100 (59.2)               |

Count (%) presented.

\* Represents those who presented with symptom (yes response)

308

## 309 DISCUSSION

310 Our finding that 34% of those attending an out of hours centre with acute URTI symptoms  
311 expected to be prescribed antibiotics prior to seeing the doctor is clinically relevant. The  
312 international literature over the last 20 years indicates that patient expectation for antibiotics  
313 for management of acute URTI varies from 10% (47) to 74% [65]. In our study, patient  
314 expectation for antibiotic treatment ranks third lowest in this literature and second lowest  
315 among studies published in the last 10 years. In a qualitative study, Dempsey et al reported a  
316 recent decrease in demand for antibiotics for acute bronchitis [58], however continued  
317 significant demand for antibiotics for acute URTI is evident. This is illustrated in Table E in  
318 Supplementary Material.

319 The statistically significant difference in expecting an antibiotic for gender and age whereby  
320 males were less likely to expect an antibiotic than females and older people (56+) are more  
321 likely to be 'unsure' whether they will need antibiotics or not (70%) may be helpful to the  
322 HCP in communicating with the patient regarding the risk/benefit balance of antibiotic  
323 treatment for acute URTI. Also the finding of no difference between those who are entitled to  
324 free care (medical card holders) and those who aren't, in their expectations of receiving  
325 antibiotics indicates that economic factors (whether or not the patient is paying for the  
326 consultation) are not of major importance in antibiotic expectation.

327 GPs and other primary care doctors are more likely to prescribe antibiotics to patients who  
328 expect them or whom they believe expect them [45-59]. It has been suggested that 'patient  
329 expectations' is an all-encompassing phrase that includes other reasons such as limited time,

1  
2  
3 330 poor doctor–patient communication and diagnostic uncertainty [45]. Therefore knowing that  
4  
5 331 only 34% of patients attending an OOH service expect an antibiotic for their acute URTI  
6  
7 332 symptoms and that this expectation is not associated with eligibility for free care helps in the  
8  
9 333 clinical decision making process and allows doctors to concentrate more on the medical need.  
10  
11  
12  
13 334 Doctors may overestimate the pressure to prescribe antibiotics for acute cough [60-62] or  
14  
15 335 other acute respiratory illnesses [54], often prescribing antibiotics for patients who did not  
16  
17 336 request them [63]. Wong et al studying a Chinese primary care population presenting with  
18  
19 337 acute URTI symptoms, found that concern about illness severity and obtaining a prescription  
20  
21 338 for symptomatic medications, rather than obtaining a prescription for antibiotics, were the  
22  
23 339 main reasons for patients consulting [47]. Ong et al found, in a study of patients attending an  
24  
25 340 emergency department with acute URTI symptoms, that doctors were only able to identify 1  
26  
27 341 in 4 of those patients who expected antibiotic treatment for their symptoms [54]. The same  
28  
29 342 study also found that patient satisfaction was not related to receipt of antibiotics but was  
30  
31 343 related to the belief they had a better understanding of their illness [54].  
32  
33  
34  
35  
36 344 There is some evidence that patients are less satisfied in general practices that have frugal  
37  
38 345 antibiotic prescribing practices in general [66]. However this retrospective study from  
39  
40 346 England with a 36% response rate did not estimate the effect of communication skills. It  
41  
42 347 could be argued that with enhanced communication skills and with the HCP eliciting and  
43  
44 348 addressing the patients concerns, the satisfaction rating for frugal prescribers would be  
45  
46 349 considerably higher.  
47  
48  
49  
50  
51 350 Several studies have shown that private patients who pay for their consultations [47, 67, 68],  
52  
53 351 as well as those of lower socioeconomic status [51, 69-72] are more likely to be prescribed  
54  
55 352 antibiotics for acute URTI. Our study showed no association between a patient's eligibility  
56  
57 353 for free care (or paying for their consultation) and expectation of an antibiotic for their acute  
58  
59  
60



1  
2  
3 354 URTI. Because this eligibility was either due to age (under 6 and over 70 years of age) or  
4  
5 355 income, it is difficult to draw direct conclusions. However, most importantly and in contrast  
6  
7 356 to earlier studies [47, 67-68], patient expectation for antibiotics was found to be unrelated to  
8  
9 357 having access to free care.

10  
11  
12  
13 358 In a study of non-medical practitioners (NMPs), Courtenay et al found reduced levels of  
14  
15 359 satisfaction among patients who expected but did not receive an antibiotic [44]. This figure  
16  
17 360 indicates that although NMPs appear to have strategies for managing acute URTI  
18  
19 361 consultations, there is still scope for improvement and these prescribers are therefore an  
20  
21 362 important group to involve in antimicrobial stewardship [44]. Antimicrobial stewardship  
22  
23 363 programs should continue to expand in the outpatient setting and should emphasize the  
24  
25 364 importance of clear and direct communication between patients and physicians [59, 73].  
26  
27 365 Patients from our study anticipated further examination, information and symptomatic  
28  
29 366 treatment. These findings closely echo those of recent studies [44, 47, 54]. It is important to  
30  
31 367 continue with public health campaigns to educate the public on the ineffectiveness of  
32  
33 368 antibiotics in treatment of acute URTI, which has been shown to reduce public expectation  
34  
35 369 for antibiotics in such cases [74].

36  
37  
38  
39  
40  
41 370 Our sample represented 25% of the 1715 patients with acute URTI who attended the single  
42  
43 371 branch of the OOH facility from October 2017-February 2018 where all the sampling was  
44  
45 372 conducted. All patients had acute URTI symptoms. Although older people are under-  
46  
47 373 represented, the overall gender profile of those attending at the OOH facility with acute URTI  
48  
49 374 symptoms are broadly similar to those investigated in this study (see tables A and B in  
50  
51 375 Supplementary Material), suggesting that our results are representative of those attending at  
52  
53 376 the OOH facility during the study period. However, the proportion of those surveyed who  
54  
55 377 were eligible for free care differed considerably to the overall proportion of those attending at  
56  
57 378 the OOH facility with acute URTI during the study period (56% compared to 74%). It can

1  
2  
3 379 also be argued that people who decide that their illness is severe enough that they need to see  
4  
5 380 a locum GP in an out of hours service in the weekend, evening or late at night and pay at least  
6  
7 381 €55 as a fee for doing so have a much greater motivation for getting an antibiotic  
8  
9  
10 382 prescription. Any other medication that they receive from the GP (e.g. analgesia, cough  
11  
12 383 bottles and antipyretics) does not require a prescription. The fact that 2/3 of respondents were  
13  
14 384 unsure of whether they expected to receive an antibiotic or did not expect to receive one is  
15  
16 385 indicative that the message on AMR and the overuse of antibiotics has reached the mind set  
17  
18 386 of those attending an out of hours centre.

19  
20  
21  
22 387 It is difficult to explain why over 50% of respondents had previously consulted for this  
23  
24 388 particular complaint. We did not ask when this previous consultation had taken place. Repeat  
25  
26 389 consultation rates of between 15% and 20% in children with acute URTI and between 20%  
27  
28 390 and 30% in adults with lower respiratory tract infections (LRTIs) have been described [75].  
29  
30 391 Between a half and two thirds of adults with LRTI who re-consult are prescribed antibiotics,  
31  
32 392 despite little evidence of an infection requiring antibiotics [75]. However an important  
33  
34 393 finding from this study was that no association was identified between whether this was the  
35  
36 394 patient's first or subsequent consultation for the presenting illness and their expectation of  
37  
38 395 being prescribed an antibiotic.

39  
40  
41  
42  
43 396 This study contains several strengths. We used a previously validated questionnaire that was  
44  
45 397 adapted and piloted by a multi-disciplinary research and clinical team. The research was  
46  
47 398 conducted over four consecutive months which would mitigate the effects of any public  
48  
49 399 health campaigns aimed at reducing antibiotic use at the time. Patients or guardians filling in  
50  
51 400 the short and anonymous questionnaire before the consultation in the waiting room meant  
52  
53 401 that respondents were more likely to be honest in their opinion. The gender profile of our  
54  
55 402 sample is broadly similar to that of the population attending during the study period with  
56  
57 403 acute URTI symptoms, although older people are under-represented. Reception staff received

1  
2  
3 404 training from the research team and were tasked with identifying and recruiting participants,  
4  
5 405 ensuring that only those with acute URTI symptoms were surveyed. The higher number of  
6  
7 406 private patient respondents helped to ensure that the finding that they do not expect  
8  
9  
10 407 antibiotics is reliable. Previous studies of this subgroup have indicated that they have a higher  
11  
12 408 expectation for antibiotics for acute URTI.

13  
14  
15 409 There are also some limitations. Our study surveyed people attending only one urban OOH  
16  
17 410 service. It is possible that those who refused to participate in the survey were more severely  
18  
19 411 ill than those who did and were more likely to look for antibiotics (approximately 5% of  
20  
21 412 those requested, refused to participate). The demographics of those who refused to participate  
22  
23 413 were not studied. As this is a single centre study, the population studied in this particular  
24  
25 414 OOH service may not reflect those seen in OOH services throughout Ireland and/or the UK.  
26  
27 415 Another limitation is that ours was not a randomly selected sample. The non-probability  
28  
29 416 nature of our sample means that bias may have been introduced and some groups under-  
30  
31 417 represented.

32  
33  
34 418 While every effort was made to ensure that this was a representative sample of those  
35  
36 419 attending with acute URTI, it is possible that the results were skewed as those eligible for  
37  
38 420 free care was slightly lower than the centres overall population. Older people (over the age of  
39  
40 421 56 years) are poorly represented in our sample. It is possible that the results would have been  
41  
42 422 different if older people were better represented. Reception staff who were not medically  
43  
44 423 trained were charged with the tasks of distributing questionnaires. This is a potential  
45  
46 424 limitation in that they may have not correctly identified (and therefore missed) a cohort of  
47  
48 425 patients who had acute respiratory tract infections. However the note of the patient's initial  
49  
50 426 presenting symptom to the call centre was available to reception staff which would have  
51  
52 427 minimised this. The patient's desire for antibiotics was not assessed against the clinician-  
53  
54  
55  
56  
57  
58  
59  
60

1  
2  
3 428 assessed need for antibiotics. However the point of the study was to assess overall patient  
4  
5 429 expectation. Severity and duration of the illness was not assessed which may have affected  
6  
7  
8 430 patient expectation for antibiotics.  
9

10  
11 431

## 12 13 432 CONCLUSIONS

14  
15  
16 433 A large proportion of those attending out of hours GP service do not have fixed ideas  
17  
18 434 regarding antibiotics and are seeking further assessment, information and reassurance. Most  
19  
20  
21 435 seem to be amenable to not receiving an antibiotic for their illness if their underlying needs  
22  
23 436 are met. This group includes patients eligible for free care as well as those paying for their  
24  
25  
26 437 consultation. Communication and clinical skills of healthcare professionals need to be  
27  
28 438 optimised to ensure reduction in antibiotic prescribing.  
29

30  
31 439

## 32 33 34 440 Recommendations for Further Research

35  
36  
37 441 The high number of repeat attendances for acute URTI requires further study. A qualitative  
38  
39 442 study of patients attending OOH setting to elicit what their intentions are for attending and  
40  
41 443 their understanding of AMR is also appropriate.  
42

43  
44  
45 444

## 46 47 445 Abbreviations

48  
49  
50 446 AMR: antimicrobial or antibiotic resistance; acute URTI: acute upper respiratory tract  
51  
52 447 infection; URTI: upper respiratory tract infection; OOH: out of hours; HCP: healthcare  
53  
54  
55 448 professional; GPs: general practitioners; Further Exam: further examination; Info:  
56  
57 449 Information; LRTIs: lower respiratory tract infections  
58  
59  
60

1  
2  
3 450  
4  
5  
6 451 DECLARATIONS  
7  
8  
9 452 Ethical approval and consent to participate  
10  
11  
12 453 Ethical approval for the study was granted by the Health Service Executive Mid-West  
13  
14 454 Research Ethics Committee. Ethics Approval Number: 068/17.  
15  
16  
17 455 Consent for publication  
18  
19  
20 456 Not applicable  
21  
22  
23 457 Availability of data and materials  
24  
25  
26 458 The datasets generated and/or analysed during the current study are not publicly available due  
27  
28 459 to variables that could identify GPs through name of practice and location but are available  
29  
30 460 from the corresponding author on reasonable request.  
31  
32  
33 461 Competing Interests  
34  
35  
36 462 The authors declare they have no competing interests.  
37  
38  
39 463 Funding  
40  
41  
42 464 This research was part funded by the Irish College of General Practitioners Research and  
43  
44 465 Education Foundation.  
46  
47  
48 466 Authors Contributions  
49  
50  
51 467 ROC conceived the study. AOR, JOD, CMcM, ROC were involved in the design of the  
52  
53 468 study. ROC and CMcM collected the data. JOD and ROC inputted the data. AON carried out  
54  
55 469 statistical analysis. ROC, CD, AOR and JOD wrote the first draft of the paper. All authors  
56  
57 470 made critical comments on all drafts of the paper, as well as read and approved the final  
58  
59 471 manuscript.  
60

1  
2  
3 472  
4  
5  
6 473 Acknowledgements  
7  
8  
9 474 Professor Ailish Hannigan, Professor of Biostatistics University of Limerick Graduate Entry  
10  
11 475 Medical School, for help with study design and analysis. Prof. Molly Courtenay, School of  
12  
13 476 Healthcare Sciences, Cardiff University, Cardiff, UK for permission to adapt their patient  
14  
15  
16 477 questionnaire. Mike Finucane and Deirdre Walsh, 'Shannondoc' head office, Shelbourne Rd.,  
17  
18 478 Limerick City. Noeleen Lyons, Maura O'Regan, Paul Gallagher from 'Shannondoc'  
19  
20 479 Dooradoyle treatment centre, Limerick City.  
21  
22

23  
24 480

25  
26 481 List of Figure and Table Legends  
27

28  
29 482 Table 1: Patient characteristics and pre-consultation expectations of antibiotics (n=435)  
30

31  
32 483 Table 2: Patient expectations for each symptom  
33

34  
35 484 Table 3: Antibiotic expectations of those presenting with different symptoms  
36

37  
38 485 Figure 1: Patients overall expectations  
39

40  
41 486 List of Supplementary Figure and Table Legends  
42

43  
44 487 Table A: Gender Proportion of those attending OOH Facility with acute URTI symptoms  
45

46  
47 488 Table B: Age of those attending OOH Facility overall during the study period  
48

49  
50 489 Table C: Eligibility for free care  
51

52  
53 490 Table D: Differences in expectation of antibiotics  
54

55  
56 491 Table E: Patient expectation for antibiotics for acute URTI over the last 20 years  
57

58  
59 492  
60

## 493 Data Availability statement

494 Deidentified participant data are available upon request from the principal author Dr

495 Raymond O'Connor for a 6 month time period from publication. Reuse is permitted with the

496 consent of all of the authors. There is no additional information available. Email

497 Raymond.oconnor@ul.ie

498

499

## 500 REFERENCES

501 1. Aryee A, Price N. Antimicrobial stewardship - can we afford to do without it? *Br J Clin*

502 *Pharmacol* 2014;79(2):173-81. doi: 10.1111/bcp.12417

503 2. Bell BG, Schellevis F, Stobberingh E, et al. A systematic review and meta-analysis of the

504 effects of antibiotic consumption on antibiotic resistance. *BMC Infect Dis* 2014;14:13:1-25.

505 doi: 10.1186/1471-2334-14-13.

506 3. Power RF, Linnane B, Martin R, et al. The first reported case of *Burkholderia contaminans*

507 in patients with cystic fibrosis in Ireland: from the Sargasso Sea to Irish Children. *BMC Pulm*

508 *Med* 2016;16(1):57:1-5. doi: 10.1186/s12890-016-0219-z.

509 4. O'Connor C, Cormican M, Boo TW, et al. An Irish outbreak of New Delhi metallo-beta-

510 lactamase (NDM)-1 carbapenemase-producing Enterobacteriaceae: increasing but

511 unrecognized prevalence. *J Hosp Infect* 2016;94(4):351-57. doi: 10.1016/j.jhin.2016.08.005

512 5. O'Connor C, O'Connell NH, Commane M, et al. Limerick: forever associated with five

513 lines of rhyme or infamous for irrepressible carbapenemase-producing Enterobacteriaceae for

514 all time? *J Hosp Infect* 2016;93(2):155-6. doi: 10.1016/j.jhin.2016.03.008.

- 1  
2  
3 515 6. Health Products Regulatory Authority. Report on Antimicrobial Resistance. Report.  
4  
5 516 Dublin: January 2016. Available from: <https://www.hpra.ie/docs/default-source/publications->  
6  
7 517 [forms/newsletters/hpra-report-on-antimicrobial-resistance.pdf?sfvrsn=6](https://www.hpra.ie/docs/default-source/publications-forms/newsletters/hpra-report-on-antimicrobial-resistance.pdf?sfvrsn=6) (accessed  
8  
9 518 18/04/2018).
- 10  
11  
12  
13 519 7. World Health Organisation (WHO). Antimicrobial resistance: global report on surveillance  
14  
15 520 2014. Report. Switzerland: June 2014. Available from:  
16  
17 521 <http://www.who.int/drugresistance/documents/surveillancereport/en/>. (accessed 27/04/2018).  
18  
19  
20  
21 522 8. SARI Hospital Antimicrobial Stewardship Working Group. Guidelines for Antimicrobial  
22  
23 523 Stewardship in Hospitals in Ireland. Dublin, Ireland, 2009:1-50. Available at:  
24  
25 524 <https://www.hpsc.ie/a->  
26  
27 525 [z/microbiologyantimicrobialresistance/infectioncontrolandhai/guidelines/File,4116,en.pdf](https://www.hpsc.ie/a-z/microbiologyantimicrobialresistance/infectioncontrolandhai/guidelines/File,4116,en.pdf)  
28  
29 526 (accessed 10/04/2018).
- 30  
31  
32  
33 527 9. Nathan C, Cars O. Antibiotic Resistance-Problems, Progress and Prospects. *N Engl J Med*  
34  
35 528 2014;371(19):1761-63. doi: 10.1056/NEJMp1408040.
- 36  
37  
38 529 10. Harbarth S, Balkhy HH, Goossens H, et al. Antimicrobial resistance: one world, one  
39  
40 530 fight! *Antimicrob Resist Infect Control* 2015;4:49. doi: 10.1186/s13756-015-0091-2.
- 41  
42  
43 531 11. The National Institute for Health and Care Excellence (NICE). Antimicrobial  
44  
45 532 stewardship: systems and processes for effective antimicrobial medicine use. NICE  
46  
47 533 Guideline (NG 15). UK. August 2015. <https://www.nice.org.uk/guidance/ng15/chapter/1->  
48  
49 534 Recommendations. (accessed 18/04/2018).
- 50  
51  
52  
53 535 12. The National Institute for Health and Care Excellence (NICE). Antimicrobial  
54  
55 536 stewardship: changing risk related behaviours in the general population. NICE Guideline (NG  
56  
57 537 63). UK. January 2017. Available at: <https://www.nice.org.uk/guidance/ng63>. (accessed  
58  
59 538 02/04/2018).



- 1  
2  
3 539 13. Harris AM, Hicks LA, Qaseem A, et al. Appropriate antibiotic use for acute respiratory  
4  
5 540 tract infection in adults: Advice for high-value care from the american college of physicians  
6  
7 541 and the centers for disease control and prevention. *Ann Intern Med* 2014;164(6):425-34. doi:  
8  
9 542 10.7326/M15-1840.
- 10  
11  
12  
13 543 14. Lee ML, Cho CY, Hsu CL, et al. Recent trends in antibiotic prescriptions for acute  
14  
15 544 respiratory tract infections in pediatric ambulatory care in Taiwan, 2000-2009: A nationwide  
16  
17 545 population-based study. *J Microbiol Immunol Infec = Wei mian yu gan ran za zhi*  
18  
19 546 2016;49(4):554-60 doi: 10.1016/j.jmii.2014.08.014].
- 20  
21  
22  
23 547 15. The National Institute for Health and Care Excellence (NICE). Self-limiting respiratory  
24  
25 548 tract infections –antibiotic prescribing. NICE Clinical Guideline (CG 69). UK. July 2008.  
26  
27 549 Available from: <https://www.nice.org.uk/guidance/cg69> (accessed 28/03/2018).
- 28  
29  
30 550 16. Meropol SB, Localio AR, Metlay JP. Risks and benefits associated with antibiotic use for  
31  
32 551 acute respiratory infections: a cohort study. *Ann Fam Med* 2013;11(2):165-72 doi:  
33  
34 552 10.1370/afm.1449.
- 35  
36  
37  
38 553 17. Fahey T, Stocks N, Thomas T. Systematic review of the treatment of upper respiratory  
39  
40 554 tract infection. *Arch Dis Child* 1998;79(3):225-30
- 41  
42  
43 555 18. Little P, Watson L, Morgan S, et al. Antibiotic prescribing and admissions with major  
44  
45 556 suppurative complications of respiratory tract infections: a data linkage study. *Br J Gen Pract*  
46  
47 557 2002;52(476):187-90, 93
- 48  
49  
50 558 19. Butler CC, Hood K, Verheij T, et al. Variation in antibiotic prescribing and its impact on  
51  
52 559 recovery in patients with acute cough in primary care: prospective study in 13 countries. *BMJ*  
53  
54 560 2009;338:b2242. doi: 10.1136/bmj.b2242.
- 55  
56  
57  
58  
59  
60

- 1  
2  
3 561 20. Gulliford MC, Moore MV, Little P, et al. Safety of reduced antibiotic prescribing for self  
4  
5 562 limiting respiratory tract infections in primary care: cohort study using electronic health  
6  
7 563 records. *BMJ* 2016;354:i3410. doi: 10.1136/bmj.i3410.  
8  
9  
10 564 21. Garbutt JM, Banister C, Spitznagel E, et al. Amoxicillin for acute rhinosinusitis: a  
11  
12 565 randomized controlled trial. *JAMA* 2012;307(7):685-92 doi: 10.1001/jama.2012.138.  
13  
14  
15 566 22. The National Institute for Health and Care Excellence (NICE). Medicines Evidence  
16  
17 567 Commentary: Acute cough – public expectation of symptom duration differs from published  
18  
19 568 evidence. NICE. UK. November 2013. Available from:  
20  
21 569 <https://www.evidence.nhs.uk/search?q=%27Acute+cough+%E2%80%93+public+expectatio>  
22  
23 570 [n+of+symptom+duration+differs+from+published+evidence%27](https://www.evidence.nhs.uk/search?q=%27Acute+cough+%E2%80%93+public+expectatio). (Accessed 20/03/2018)  
24  
25  
26 571 23. Spinks A, Glasziou PP, Del Mar CB. Antibiotics for sore throat. *Cochrane Database Syst*  
27  
28 572 *Rev* 2013(11):Cd000023 doi:10.1002/14651858.CD000023.pub4. (Accessed 16/01/2018).  
29  
30  
31 573 24. Little P, Gould C, Williamson I, et al. Reattendance and complications in a randomised  
32  
33 574 trial of prescribing strategies for sore throat: the medicalising effect of prescribing antibiotics.  
34  
35 575 *BMJ* 1997;315(7104):350-2  
36  
37  
38 576 25. Yaeger JP, Temte JL, Hanrahan LP, et al. Roles of Clinician, Patient, and Community  
39  
40 577 Characteristics in the Management of Pediatric Upper Respiratory Tract Infections. *Ann Fam*  
41  
42 578 *Med* 2015;13(6):529-36 doi: 10.1370/afm.1856.  
43  
44  
45 579 26. Silverman M, Povitz M, Sontrop JM, et al. Antibiotic Prescribing for Nonbacterial Acute  
46  
47 580 Upper Respiratory Infections in Elderly Persons. *Ann Intern Med* 2017;166(11):765-74 doi:  
48  
49 581 10.7326/m16-1131.  
50  
51  
52  
53  
54  
55  
56  
57  
58  
59  
60

- 1  
2  
3 582 27. Schroeck JL, Ruh CA, Sellick JA, Jr., et al. Factors associated with antibiotic misuse in  
4  
5 583 outpatient treatment for upper respiratory tract infections. *Antimicrob Agents Chemother*  
6  
7 584 2015;59(7):3848-52 doi: 10.1128/aac.00652-15.
- 8  
9  
10 585 28. Teng CL. Antibiotic prescribing for upper respiratory tract infections in the Asia-Pacific  
11  
12 586 region: A brief review. *Malays Fam Physician* 2014;9(2):18-25
- 13  
14  
15 587 29. Murphy M, Bradley CP, Byrne S. Antibiotic prescribing in primary care, adherence to  
16  
17 588 guidelines and unnecessary prescribing - an Irish perspective. *BMC Fam Pract* 2012;13:43-  
18  
19 589 43 doi: 10.1186/1471-2296-13-43.
- 20  
21  
22 590 30. Rún Sigurðardóttir N, Nielsen ABS, Munck A, et al. Appropriateness of antibiotic  
23  
24 591 prescribing for upper respiratory tract infections in general practice: Comparison between  
25  
26 592 Denmark and Iceland. *Scand J Prim Health Care* 2015;33(4):269-74 doi:  
27  
28 593 10.3109/02813432.2015.1114349.
- 29  
30  
31 594 31. Davis ME, Liu TL. Exploring Patient Awareness and Perceptions of the Appropriate Use  
32  
33 595 of Antibiotics: A Mixed-Methods Study. *Antibiotics (Basel)*. 2017 Oct 31;6(4) doi:  
34  
35 596 10.3390/antibiotics6040023.
- 36  
37  
38 597 32. Watkins L, Sanchez G, Albert A, et al. Knowledge and Attitudes Regarding Antibiotic  
39  
40 598 Use Among Adult Consumers, Adult Hispanic Consumers, and Health Care Providers —  
41  
42 599 United States, 2012–2013. *MMWR USA* 2015/64(28):767-70. Available at:  
43  
44 600 <https://www.cdc.gov/mmwr/preview/mmwrhtml/mm6428a5.htm> (accessed 16/01/2018).
- 45  
46  
47 601 33. Public Health England. Health matters: antimicrobial resistance. PH England. UK.  
48  
49 602 December 2015. Available From: [https://www.gov.uk/government/publications/health-](https://www.gov.uk/government/publications/health-matters-antimicrobial-resistance)  
50  
51 603 [matters-antimicrobial-resistance](https://www.gov.uk/government/publications/health-matters-antimicrobial-resistance) (accessed 16/01/2018).
- 52  
53  
54  
55  
56  
57  
58  
59  
60

- 1  
2  
3 604 34. McDonagh M, Peterson K, Winthrop K, et al. Improving Antibiotic Prescribing for  
4  
5 605 Uncomplicated Acute Respiratory Tract Infections [Internet]. Rockville (MD). AHRQ  
6  
7 606 WebM&M; Report No.: 15(16)-EHC033-EF. 2016 Jan. (Comparative Effectiveness Reviews,  
8  
9 607 No. 163.) Available from: <https://www.ncbi.nlm.nih.gov/books/NBK344270/> (accessed  
10  
11 608 16/01/2018)
- 12  
13  
14  
15 609 35. Lindberg BH, Gjelstad S, Foshaug M, et al. Antibiotic prescribing for acute respiratory  
16  
17 610 tract infections in Norwegian primary care out-of-hours service. *Scand J Prim Health Care*  
18  
19 611 2017;35(2):178-85 doi: 10.1080/02813432.2017.1333301.
- 20  
21  
22  
23 612 36. Huibers L, Moth G, Christensen MB, et al. Antibiotic prescribing patterns in out-of-hours  
24  
25 613 primary care: A population-based descriptive study. *Scand J Prim Health Care*  
26  
27 614 2014;32(4):200-07 doi: 10.3109/02813432.2014.972067.
- 28  
29  
30 615 37. Dyrkorn R, Gjelstad S, Espnes KA, et al. Peer academic detailing on use of antibiotics in  
31  
32 616 acute respiratory tract infections. A controlled study in an urban Norwegian out-of-hours  
33  
34 617 service. *Scand J Prim Health Care* 2016;34(2):180-5 doi: 10.3109/02813432.2016.1163035.
- 35  
36  
37  
38 618 38. Elshout G, Kool M, Van der Wouden JC, et al. Antibiotic prescription in febrile children:  
39  
40 619 a cohort study during out-of-hours primary care. *J Am Board Fam Med* 2012;25(6):810-8 doi:  
41  
42 620 10.3122/jabfm.2012.06.110310.
- 43  
44  
45 621 39. Giesen P, Willekens M, Mokkink H, et al. Out-of-hours primary care: development of  
46  
47 622 indicators for prescribing and referring. *Int J Qual Health Care* 2007;19(5):289-95 doi:  
48  
49 623 10.1093/intqhc/mzm027.
- 50  
51  
52  
53 624 40. Willekens M, Giesen P, Plat E, et al. Quality of after-hours primary care in the  
54  
55 625 Netherlands: adherence to national guidelines. *BMJ Qual Saf* 2011;20:223-27
- 56  
57  
58  
59  
60

- 1  
2  
3 626 41. Hayward GN, Fisher RF, Spence GT, et al. Increase in antibiotic prescriptions in out-of-  
4  
5 627 hours primary care in contrast to in-hours primary care prescriptions: service evaluation in a  
6  
7 628 population of 600 000 patients. *J Antimicrob Chemother* 2016;71(9):2612-9 doi:  
9  
10 629 10.1093/jac/dkw189.  
11  
12  
13 630 42. Debets VE, Verheij TJ, van der Velden AW. Antibiotic prescribing during office hours  
14  
15 631 and out-of-hours: a comparison of quality and quantity in primary care in the Netherlands. *Br*  
16  
17 632 *J Gen Pract* 2017;67(656):e178-e86 doi: 10.3399/bjgp17X689641.  
19  
20 633 43. Kallestrup P, Bro F. Parents' beliefs and expectations when presenting with a febrile child  
21  
22 634 at an out-of-hours general practice clinic. *Br J Gen Pract* 2003;53(486):43-44  
24  
25  
26 635 44. Courtenay M, Rowbotham S, Lim R, et al. Antibiotics for acute respiratory tract  
27  
28 636 infections: a mixed-methods study of patient experiences of non-medical prescriber  
29  
30 637 management. *BMJ Open* 2017;7(3):e013515 doi: 10.1136/bmjopen-2016-013515.  
32  
33  
34 638 45. Fletcher-Lartey S, Yee M, Gaarslev C, et al. Why do general practitioners prescribe  
35  
36 639 antibiotics for upper respiratory tract infections to meet patient expectations: a mixed  
37  
38 640 methods study. *BMJ Open* 2016;6(10):e012244 doi: 10.1136/bmjopen-2016-012244.  
39  
40  
41 641 46. Md Rezal RS, Hassali MA, Alrasheedy AA, et al. Physicians' knowledge, perceptions and  
42  
43 642 behaviour towards antibiotic prescribing: a systematic review of the literature. *Expert Rev*  
44  
45 643 *Anti Infect Ther* 2015;13(5):665-80 doi: 10.1586/14787210.2015.1025057.  
47  
48  
49 644 47. Wong CK, Liu Z, Butler CC, et al. Help-seeking and antibiotic prescribing for acute  
50  
51 645 cough in a Chinese primary care population: a prospective multicentre observational study.  
52  
53 646 *NPJ Prim Care Respir Med* 2016;26:15080 doi: 10.1038/npjpcrm.2015.80.  
54  
55  
56 647 48. Gambarelli L, Montanari C, Manni A, et al. Antibiotics in viral upper respiratory tract  
57  
58 648 infections. *Ricerca e Pratica* 2002;18(4):152-56  
59  
60

- 1  
2  
3 649 49. Biezen R, Brijnath B, Grando D, et al. Management of respiratory tract infections in  
4  
5 650 young children-A qualitative study of primary care providers' perspectives. NPJ Prim Care  
6  
7 651 Respir Med 2017;27(1):15 doi: 10.1038/s41533-017-0018-x.  
8  
9  
10  
11 652 50. Hamm RM, Hicks RJ, Bemben DA. Antibiotics and respiratory infections: are patients  
12  
13 653 more satisfied when expectations are met? J Fam Pract 2006;43(1):56-62  
14  
15  
16 654 51. Shlomo V, Adi R, Eliezer K. The knowledge and expectations of parents about the role of  
17  
18 655 antibiotic treatment in upper respiratory tract infection--a survey among parents attending the  
19  
20 656 primary physician with their sick child. BMC Fam Pract 2003;4:20 doi: 10.1186/1471-2296-  
21  
22 657 4-20.  
23  
24  
25  
26 658 52. Martin CL, Njike VY, Katz DL. Back-up antibiotic prescriptions could reduce  
27  
28 659 unnecessary antibiotic use in rhinosinusitis. J Clin Epidemiol 2004;57(4):429-34 doi:  
29  
30 660 10.1016/j.jclinepi.2003.09.008.  
31  
32  
33  
34 661 53. Soma M, Slapgard H, Lerberg M, et al. [Patients' expectations of antibiotics for acute  
35  
36 662 respiratory tract infections]. Tidsskr. Nor. Laegeforen 2005;125(15):1994-7  
37  
38  
39 663 54. Ong S, Nakase J, Moran GJ, et al. Antibiotic use for emergency department patients with  
40  
41 664 upper respiratory infections: prescribing practices, patient expectations, and patient  
42  
43 665 satisfaction. Ann Emerg Med 2007;50(3):213-20 doi: 10.1016/j.annemergmed.2007.03.026.  
44  
45  
46 666 55. Ackerman SL, Gonzales R, Stahl MS, et al. One size does not fit all: evaluating an  
47  
48 667 intervention to reduce antibiotic prescribing for acute bronchitis. BMC Health Serv Res  
49  
50 668 2013;13(1):462 doi: 10.1186/1472-6963-13-462.  
51  
52  
53  
54 669 56. Hardy-Holbrook R, Svetlana A, Vandana C, et al. Antibiotic resistance and prescribing in  
55  
56 670 Australia: Current attitudes and practice of GPs. Healthc Infect 2013;18(4):147-51  
57  
58  
59  
60

- 1  
2  
3 671 57. McNulty CA, Nichols T, French DP, et al. Expectations for consultations and antibiotics  
4  
5 672 for respiratory tract infection in primary care: the RTI clinical iceberg. *Br J Gen Pract*  
6  
7 673 2013;63(612):e429-36 doi: 10.3399/bjgp13X669149.
- 8  
9  
10 674 58. Dempsey P, Businger A, Whaley L, et al. Primary care clinicians' perceptions about  
11  
12 675 antibiotic prescribing for acute bronchitis: a qualitative study. *BMC Fam Pract* 2014;15:194  
13  
14 676 doi: 10.1186/s12875-014-0194-5.
- 15  
16  
17 677 59. McKay R, Mah A, Law M. Systematic Review of Factors Associated with Antibiotic  
18  
19 678 Prescribing for Respiratory Tract Infections. *Antimicrob Agents Chemother* 2016;60(7):4106-  
20  
21 679 18 doi: 10.1128/aac.00209-16.
- 22  
23  
24 680 60. Welschen I, Kuyvenhoven M, Hoes A, et al. Antibiotics for acute respiratory tract  
25  
26 681 symptoms: patients' expectations, GPs' management and patient satisfaction. *Fam Pract*  
27  
28 682 2004;21(3):234-7
- 29  
30  
31 683 61. Altiner A, Knauf A, Moebes J, et al. Acute cough: a qualitative analysis of how GPs  
32  
33 684 manage the consultation when patients explicitly or implicitly expect antibiotic prescriptions.  
34  
35 685 *Fam Pract* 2004;21(5):500-6 doi: 10.1093/fampra/cmh505.
- 36  
37  
38 686 62. Linder JA, Singer DE. Desire for antibiotics and antibiotic prescribing for adults with  
39  
40 687 upper respiratory tract infections. *J Gen Intern Med* 2003;18(10):795-801
- 41  
42  
43 688 63. Kautz-Freimuth S, Redaelli M, Samel C, et al. Parental views on acute otitis media  
44  
45 689 (AOM) and its therapy in children - results of an exploratory survey in German childcare  
46  
47 690 facilities. *BMC Pediatr* 2015;15:199 doi: 10.1186/s12887-015-0516-3.
- 48  
49  
50 691 64. Department of Health Ireland. Health Service Executive. Cards and schemes: Medical  
51  
52 692 cards. Dublin 2018. Available at: <https://www.hse.ie/eng/cards-schemes/medical-card/>  
53  
54 693 (accessed 07/02/2018).
- 55  
56  
57  
58  
59  
60

- 1  
2  
3 694 65. Panagakou SG, Spyridis N, Papaevangelou V, et al. Antibiotic use for upper respiratory  
4  
5 695 tract infections in children: a cross-sectional survey of knowledge, attitudes, and practices  
6  
7 696 (KAP) of parents in Greece. *BMC Pediatr* 2011;11:60 doi: 10.1186/1471-2431-11-60.  
8  
9  
10  
11 697 66. Ashworth M, White P, Jongsma H, et al. Antibiotic prescribing and patient satisfaction in  
12  
13 698 primary care in England: cross-sectional analysis of national patient survey data and  
14  
15 699 prescribing data. *Br J Gen Pract* 2016;66(642):e40-e46 doi: 10.3399/bjgp15X688105.  
16  
17  
18 700 67. Murphy M, Byrne S, Bradley CP. Influence of patient payment on antibiotic prescribing  
19  
20 701 in Irish general practice: a cohort study. *Br J Gen Pract* 2011;61(590):e549-55 doi:  
21  
22 702 10.3399/bjgp11X593820.  
23  
24  
25 703 68. Ab Rahman N, Teng CL, Sivasampu S. Antibiotic prescribing in public and private  
26  
27 704 practice: a cross-sectional study in primary care clinics in Malaysia. *BMC Infect Dis*  
28  
29 705 2016;16:208 doi: 10.1186/s12879-016-1530-2.  
30  
31  
32  
33 706 69. Kumar S, Little P, Britten N. Why do general practitioners prescribe antibiotics for sore  
34  
35 707 throat? Grounded theory interview study. *BMJ* 2003;326(7381):138  
36  
37  
38 708 70. Vaz L, Kleinman K, Lakoma M, et al. Prevalence of Parental Misconceptions About  
39  
40 709 Antibiotic Use. *Pediatrics* 2015;136(2):221-31 doi: 10.1542/peds.2015-0883.  
41  
42  
43  
44 710 71. Rousounidis A, Papaevangelou V, Hadjipanayis A, et al. Descriptive study on parents'  
45  
46 711 knowledge, attitudes and practices on antibiotic use and misuse in children with upper  
47  
48 712 respiratory tract infections in Cyprus. *Int J Environ Res Public Health* 2011;8(8):3246-62  
49  
50 713 doi: 10.3390/ijerph8083246.  
51  
52  
53  
54 714 72. Salazar M, English T, Eiland L. Caregivers' baseline understanding and expectations of  
55  
56 715 antibiotic use for their children. *Clin Pediatr (Phila)* 2012;51(7):632-7 doi:  
57  
58 716 10.1177/0009922812439243.  
59  
60



- 1  
2  
3 717 73. Little P, Stuart B, Francis NA, et al. Effects of internet-based training on antibiotic  
4  
5 718 prescribing rates for acute respiratory-tract infections: a multinational, cluster, randomised,  
6  
7 719 factorial, controlled trial. Lancet 2013;382 doi: 10.1016/s0140-6736(13)60994-0.  
8  
9  
10 720 74. Chaintarli K, Ingle SM, Bhattacharya A, et al. Impact of a United Kingdom-wide  
11  
12 721 campaign to tackle antimicrobial resistance on self-reported knowledge and behaviour  
13  
14 722 change. BMC Public Health 2016;16:393 doi: 10.1186/s12889-016-3057-2.  
15  
16  
17  
18 723 75. Stanton N, Francis NA, Butler CC. Reducing uncertainty in managing respiratory tract  
19  
20 724 infections in primary care. Br J Gen Pract 2010;60(581):e466-75 doi:  
21  
22 725 10.3399/bjgp10X544104.  
23  
24  
25  
26 726  
27  
28  
29 727  
30  
31  
32 728  
33  
34  
35  
36  
37  
38  
39  
40  
41  
42  
43  
44  
45  
46  
47  
48  
49  
50  
51  
52  
53  
54  
55  
56  
57  
58  
59  
60



1  
2  
3  
4  
5  
6  
7  
8  
9  
10  
11  
12  
13  
14  
15  
16  
17  
18  
19  
20  
21  
22  
23  
24  
25  
26  
27  
28  
29  
30  
31  
32  
33  
34  
35  
36  
37  
38  
39  
40  
41  
42  
43  
44  
45  
46

1  
2  
3 1 SUPPLEMENTARY MATERIAL: AGE AND GENDER COMPARISON OF OUR  
4  
5 2 SAMPLE WITH THOSE ATTENDING SHANNONDOC FACILITY DURING THE  
6  
7 3 STUDY PERIOD  
8  
9  
10  
11 4  
12  
13

14 5 Table A: Gender Proportion of those attending OOH Facility with ARTI symptoms  
15

|                             |        | Shannondoc Dooradoyle*<br>(n=1715) | GEMS<br>(n=435) |
|-----------------------------|--------|------------------------------------|-----------------|
| Gender                      | Male   | 783 (39.4)                         | 176 (40.5)      |
|                             | Female | 1205 (60.1)                        | 259 (59.5)      |
| *1988 with resp. complaints |        |                                    |                 |
| Counts (%) presented        |        |                                    |                 |

16  
17  
18  
19  
20  
21  
22  
23  
24  
25  
26  
27  
28  
29  
30  
31 6 Shannondoc Dooradoyle\*: This number refers to the population who attended the  
32  
33 7 µ 6 K D Q Q R Q G R F ¶ ' R R U D G R, where the study took place during the study  
34  
35 8 period.  
36  
37  
38  
39  
40

41 10 Table B: Age of those attending OOH Facility overall during the study period  
42  
43

| Shannondoc OOH Facility** (n=11,455) |      |             |
|--------------------------------------|------|-------------|
| Age                                  | 0-4  | 4706 (41.1) |
|                                      | 5-64 | 5208 (45.5) |
|                                      | 65+  | 1541 (13.4) |
| UL Antibiotic Study (n=435)          |      |             |
| Age                                  | 0-6  | 186 (42.7)  |
|                                      | 7-55 |             |

|                       |     |            |
|-----------------------|-----|------------|
|                       |     | 226 (51.9) |
|                       | 56+ | 23 (5.3)   |
| Counts (%) presented. |     |            |

11 Shannondoc OOH Facility<sup>\*\*</sup>: This number refers to the entire population of patients who

12 D W W H Q G H G D O O μ 6 K D Q Q R Q G R F † R X W R I K R X U V F H Q W U H V

13

14 Table C: Eligibility for free care

|                        |     | Shannondoc OOH Facility<br>(Total=11,455) | UL Antibiotic Study<br>(Total=435) |
|------------------------|-----|-------------------------------------------|------------------------------------|
| Eligible for Free Care | Yes | 8477 (74)                                 | 244 (56)                           |
|                        | No  | 2978 (26)                                 | 191 (44)                           |
| Counts (%) presented   |     |                                           |                                    |

15

16 Table E: Patient expectation for antibiotics for ARTI over the last 20 years.

| Study         | Year | Location | Patient Expectation<br>For Antibiotic for ARTI |
|---------------|------|----------|------------------------------------------------|
| Hamm          | 1996 | USA      | 65%                                            |
| Shlomo Vinker | 2003 | Israel   | 25%                                            |
| Martin        | 2004 | USA      | 76%                                            |
| Soma          | 2005 | Norway   | 38%                                            |

1  
2  
3  
4  
5  
6  
7  
8  
9  
10  
11  
12  
13  
14  
15  
16  
17  
18  
19  
20  
21  
22  
23  
24  
25  
26  
27  
28  
29  
30  
31  
32  
33  
34  
35  
36  
37  
38  
39  
40  
41  
42  
43  
44  
45  
46  
47  
48  
49  
50  
51  
52  
53  
54  
55  
56  
57  
58  
59  
60

|               |      |           |     |
|---------------|------|-----------|-----|
| Panagakau     | 2011 | Greece    | 74% |
| McNulty       | 2013 | UK        | 53% |
| Zyoud         | 2015 | Palestine | 73% |
| Wong          | 2017 | China     | 10% |
| UL/Shannondoc | 2018 | Ireland   | 34% |

17

18

For peer review only

Supplementary Table 6: Differences in expectation of antibiotics

|                           |         | Yes (vs no/unsure) |                                   |         | Unsure (vs yes/no) |                                   |         | No (vs yes/unsure) |                                   |         |
|---------------------------|---------|--------------------|-----------------------------------|---------|--------------------|-----------------------------------|---------|--------------------|-----------------------------------|---------|
|                           |         | %                  | Difference<br>(95% CI difference) | p-value | %                  | Difference<br>(95% CI difference) | p-value | %                  | Difference<br>(95% CI difference) | p-value |
| Gender                    | Males   | 32%                | 4% (5%, 13%)                      | 0.38    | 52%                | 5% (4%, 15%)                      | 0.28    | 16%                | 9% (3%, 16%)                      | 0.002*  |
|                           | Females | 36%                |                                   |         | 58%                |                                   |         | 7%                 |                                   |         |
| Age                       | <56     | 34%                | 4% (-17%, 20%)                    | 0.69    | 55%                | 15% (6%, 31%)                     | 0.16    | 11%                | 11% (7%, 14%)                     | 0.09    |
|                           | 56+     | 30%                |                                   |         | 70%                |                                   |         | 0%                 |                                   |         |
| Eligibility for Free Care | Yes     | 38%                | 8% (-1%, 17%)                     | 0.09    | 53%                | 6% (4%, 15%)                      | 0.23    | 9%                 | 2% (4%, 10%)                      | 0.48    |
|                           | No      | 30%                |                                   |         | 59%                |                                   |         | 12%                |                                   |         |
| First Consultation        | Yes     | 31%                | 6% (3%, 15%)                      | 0.20    | 59%                | 7% (2%, 16%)                      | 0.15    | 10%                | 1% (5%, 7%)                       | 0.72    |
|                           | No      | 37%                |                                   |         | 52%                |                                   |         | 11%                |                                   |         |

## Study of The Treatment of Breathing Complaints of the Upper Airway

**Appendix 1. Patient questionnaire.**

Please complete the following for you (if you are the patient) or your child (if your child is the patient):

1. Age: Under 6 % 6-25 % 26-55 % 56-70 % Over 70 %

2. Gender: Male % Female %

3. Medical card: Yes % No %

4. Is it your first consultation with a GP or Shannondoc for this complain? Yes % No %

5. Do you expect to receive antibiotics for this illness? Yes % No % Unsure %

6. Reasons for seeing the docto(pleasetick all that apply):

|                                                   |  |
|---------------------------------------------------|--|
| Ear ache or discharge                             |  |
| Complaints of nose/sinuses                        |  |
| Common cold                                       |  |
| Throat ache                                       |  |
| Cough                                             |  |
| Other (please specify):<br>e.g. flu like symptoms |  |

7. Do you expect to receive from the doctor (pleasetick all that apply):

|                                    |  |
|------------------------------------|--|
| Further examination                |  |
| Information                        |  |
| Reassurance                        |  |
| Medication for pain relief         |  |
| Nose drops                         |  |
| Medication for cough               |  |
| Referral to hospital or specialist |  |
| Other (please specify)             |  |

8. We may wish to contact you to discuss your experience in more detail as part of a follow up study. If you are happy to be contacted for this purpose then please provide your details below(please print):

Name: \_\_\_\_\_

Address: \_\_\_\_\_

Contact Telephone Number/Email \_\_\_\_\_

Please hand your completed questionnaire to the receptionist

## STROBE 2007 (v4) Statement—Checklist of items that should be included in reports of cross-sectional studies

| Section/Topic                | Item # | Recommendation                                                                                                                                                                       | Reported on page # |
|------------------------------|--------|--------------------------------------------------------------------------------------------------------------------------------------------------------------------------------------|--------------------|
| Title and abstract           | 1      | (a) Indicate the study's design with a commonly used term in the title or the abstract                                                                                               | 1                  |
|                              |        | (b) Provide in the abstract an informative and balanced summary of what was done and what was found                                                                                  | 3+4                |
| <b>Introduction</b>          |        |                                                                                                                                                                                      |                    |
| Background/rationale         | 2      | Explain the scientific background and rationale for the investigation being reported                                                                                                 | 5-7                |
| Objectives                   | 3      | State specific objectives, including any prespecified hypotheses                                                                                                                     | 7                  |
| <b>Methods</b>               |        |                                                                                                                                                                                      |                    |
| Study design                 | 4      | Present key elements of study design early in the paper                                                                                                                              | 7                  |
| Setting                      | 5      | Describe the setting, locations, and relevant dates, including periods of recruitment, exposure, follow-up, and data collection                                                      | 7                  |
| Participants                 | 6      | (a) Give the eligibility criteria, and the sources and methods of selection of participants                                                                                          | 8                  |
| Variables                    | 7      | *Clearly define all outcomes, exposures, predictors, potential confounders, and effect modifiers. Give diagnostic criteria, if applicable                                            | 8-9                |
| Data sources/<br>measurement | 8*     | For each variable of interest, give sources of data and details of methods of assessment (measurement). Describe comparability of assessment methods if there is more than one group | 8-9                |
| Bias                         | 9      | Describe any efforts to address potential sources of bias                                                                                                                            | N/A                |
| Study size                   | 10     | Explain how the study size was arrived at                                                                                                                                            | 8                  |
| Quantitative variables       | 11     | Explain how quantitative variables were handled in the analyses. If applicable, describe which groupings were chosen and why                                                         | 9                  |
| Statistical methods          | 12     | (a) Describe all statistical methods, including those used to control for confounding                                                                                                | 9                  |
|                              |        | (b) Describe any methods used to examine subgroups and interactions                                                                                                                  | N/A                |
|                              |        | (c) Explain how missing data were addressed                                                                                                                                          | N/A                |
|                              |        | (d) If applicable, describe analytical methods taking account of sampling strategy                                                                                                   | N/A                |
|                              |        | (e) Describe any sensitivity analyses                                                                                                                                                | N/A                |
| <b>Results</b>               |        |                                                                                                                                                                                      |                    |



|                   |     |                                                                                                                                                                                                                                                                                                                                                                                                               |                       |
|-------------------|-----|---------------------------------------------------------------------------------------------------------------------------------------------------------------------------------------------------------------------------------------------------------------------------------------------------------------------------------------------------------------------------------------------------------------|-----------------------|
| Participants      | 13* | (a) Report numbers of individuals at each stage of study—eg numbers potentially eligible, examined for eligibility, confirmed eligible, included in the study, completing follow-up, and analysed<br>(b) Give reasons for non-participation at each stage<br>(c) Consider use of a flow diagram                                                                                                               | 10                    |
| Descriptive data  | 14* | (a) Give characteristics of study participants (eg demographic, clinical, social) and information on exposures and potential confounders<br>(b) Indicate number of participants with missing data for each variable of interest                                                                                                                                                                               | 10<br>N/A             |
| Outcome data      | 15* | Report numbers of outcome events or summary measures                                                                                                                                                                                                                                                                                                                                                          | N/A<br>11-12          |
| Main results      | 16  | (a) Give unadjusted estimates and, if applicable, confounder-adjusted estimates and their precision (eg, 95% confidence interval). Make clear which confounders were adjusted for and why they were included<br>(b) Report category boundaries when continuous variables were categorized<br>(c) If relevant, consider translating estimates of relative risk into absolute risk for a meaningful time period | 11-12<br>10-14<br>N/A |
| Other analyses    | 17  | Report other analyses done—eg analyses of subgroups and interactions, and sensitivity analyses                                                                                                                                                                                                                                                                                                                | <del>12-14</del>      |
| Discussion        |     |                                                                                                                                                                                                                                                                                                                                                                                                               |                       |
| Key results       | 18  | Summarise key results with reference to study objectives                                                                                                                                                                                                                                                                                                                                                      | 14-18                 |
| Limitations       | 19  | Discuss limitations of the study, taking into account sources of potential bias or imprecision. Discuss both direction and magnitude of any potential bias                                                                                                                                                                                                                                                    | 18                    |
| Interpretation    | 20  | Give a cautious overall interpretation of results considering objectives, limitations, multiplicity of analyses, results from similar studies, and other relevant evidence                                                                                                                                                                                                                                    | 14-18                 |
| Generalisability  | 21  | Discuss the generalisability (external validity) of the study results                                                                                                                                                                                                                                                                                                                                         | 18-19                 |
| Other information |     |                                                                                                                                                                                                                                                                                                                                                                                                               |                       |
| Funding           | 22  | Give the source of funding and the role of the funders for the present study and, if applicable, for the original study on which the present article is based                                                                                                                                                                                                                                                 | 20                    |

\*Give information separately for cases and controls in case-control studies and, if applicable, for exposed and unexposed groups in cohort and cross-sectional studies.

**Note:** An Explanation and Elaboration article discusses each checklist item and gives methodological background and published examples of transparent reporting. The STROBE checklist is best used in conjunction with this article (freely available on the Web sites of PLOS Medicine at <http://www.plosmedicine.org/>, Annals of Internal Medicine at <http://www.annals.org/>, and Epidemiology at <http://www.epidem.com/>). Information on the STROBE Initiative is available at [www.strobe-statement.org](http://www.strobe-statement.org).

1  
2  
3  
4  
5  
6  
7  
8  
9  
10  
11  
12  
13  
14  
15  
16  
17  
18  
19  
20  
21  
22  
23  
24  
25  
26  
27  
28  
29  
30  
31  
32  
33  
34  
35  
36  
37  
38  
39  
40  
41  
42  
43  
44  
45  
46  
47  
48  
49  
50  
51  
52  
53  
54  
55  
56  
57  
58  
59  
60
