# Supplementary material for: Medical management of acute upper respiratory infections in an urban primary care out-of-hours facility: cross-sectional study of patient presentations and expectations
Source: PubMed Central journal article supplement — BMJ Open. 2019 Feb 15;9(2):e025396. doi: 10.1136/bmjopen-2018-025396 (PMC6398638; doi:10.1136/bmjopen-2018-025396), 2019-02-15
Supplement: bmjopen-2018-025396supp001.pdf [file bmjopen-2018-025396supp001.pdf]

*Study of The Treatment of Breathing Complaints of the Upper Airway*

**Appendix 1. Patient questionnaire.**

Please complete the following for you (if you are the patient) or your child (if your child is the patient):

1. Age: Under 6  6-25  26-55  56-70  Over 70

2. Gender: Male  Female

3. Medical card: Yes  No

4. Is it your first consultation with a GP or Shannondoc for this complaint? Yes  No

5. Do you expect to receive antibiotics for this illness? Yes  No  Unsure

**6. Reasons for seeing the doctor (please tick all that apply):**

|                                                           |                          |
|-----------------------------------------------------------|--------------------------|
| <i>Ear ache or discharge</i>                              | <input type="checkbox"/> |
| <i>Complaints of nose/sinuses</i>                         | <input type="checkbox"/> |
| <i>Common cold</i>                                        | <input type="checkbox"/> |
| <i>Throat ache</i>                                        | <input type="checkbox"/> |
| <i>Cough</i>                                              | <input type="checkbox"/> |
| <i>Other (please specify):<br/>e.g. flu like symptoms</i> |                          |

**7. Do you expect to receive from the doctor (please tick all that apply):**

|                                           |                          |
|-------------------------------------------|--------------------------|
| <i>Further examination</i>                | <input type="checkbox"/> |
| <i>Information</i>                        | <input type="checkbox"/> |
| <i>Reassurance</i>                        | <input type="checkbox"/> |
| <i>Medication for pain relief</i>         | <input type="checkbox"/> |
| <i>Nose drops</i>                         | <input type="checkbox"/> |
| <i>Medication for cough</i>               | <input type="checkbox"/> |
| <i>Referral to hospital or specialist</i> | <input type="checkbox"/> |
| <i>Other (please specify):</i>            |                          |

8. We may wish to contact you to discuss your experience in more detail as part of a follow up study. If you are happy to be contacted for this purpose then please provide your details below (please print):

Name: \_\_\_\_\_

Address: \_\_\_\_\_

Contact Telephone Number/Email: \_\_\_\_\_

**Please hand your completed questionnaire to the receptionist**
