# Supplementary material for: Medical management of acute upper respiratory infections in an urban primary care out-of-hours facility: cross-sectional study of patient presentations and expectations
Source: PubMed Central journal article supplement — BMJ Open. 2019 Feb 15;9(2):e025396. doi: 10.1136/bmjopen-2018-025396 (PMC6398638; doi:10.1136/bmjopen-2018-025396), 2019-02-15
Supplement: bmjopen-2018-025396supp002.pdf [file bmjopen-2018-025396supp002.pdf]

1 **SUPPLEMENTARY MATERIAL: AGE AND GENDER COMPARISION OF OUR**  
 2 **SAMPLE WITH THOSE ATTENDING SHANNONDOC FACILITY DURING THE**  
 3 **STUDY PERIOD**

5 **Table A: Gender Proportion of those attending OOH Facility with ARTI symptoms**

|                                                     |        | <b>Shannondoc Dooradoyle*</b><br><b>(n=1715)</b> | <b>GEMS</b><br><b>(n=435)</b> |
|-----------------------------------------------------|--------|--------------------------------------------------|-------------------------------|
| Gender                                              | Male   | 783 (39.4)                                       | 176 (40.5)                    |
|                                                     | Female | 1205 (60.1)                                      | 259 (59.5)                    |
| *1988 with resp. complaints<br>Counts (%) presented |        |                                                  |                               |

6 **Shannondoc Dooradoyle\*:** This number refers to the population who attended the  
 7 ‘Shannondoc’ Dooradoyle out of hours centre, where the study took place, during the study  
 8 period.

10 **Table B: Age of those attending OOH Facility overall during the study period**

| <b>Shannondoc OOH Facility** (n=11,455)</b> |             |             |
|---------------------------------------------|-------------|-------------|
| <b>Age</b>                                  | <b>0-4</b>  | 4706 (41.1) |
|                                             | <b>5-64</b> | 5208 (45.5) |
|                                             | <b>65+</b>  | 1541 (13.4) |
| <b>UL Antibiotic Study (n=435)</b>          |             |             |
| <b>Age</b>                                  | <b>0-6</b>  | 186 (42.7)  |
|                                             | <b>7-55</b> |             |

|                       |            |            |
|-----------------------|------------|------------|
|                       |            | 226 (51.9) |
|                       | <b>56+</b> | 23 (5.3)   |
| Counts (%) presented. |            |            |

11 **Shannondoc OOH Facility\*\*:** This number refers to the entire population of patients who  
 12 attended all ‘Shannondoc’ out of hours centres during the study period.

13

14 **Table C: Eligibility for free care**

|                               |     | <b>Shannondoc OOH Facility<br/>(Total=11,455)</b> | <b>UL Antibiotic Study<br/>(Total=435)</b> |
|-------------------------------|-----|---------------------------------------------------|--------------------------------------------|
| <b>Eligible for Free Care</b> | Yes | 8477 (74)                                         | 244 (56)                                   |
|                               | No  | 2978 (26)                                         | 191 (44)                                   |
| Counts (%) presented          |     |                                                   |                                            |

15

16 **Table E: Patient expectation for antibiotics for ARTI over the last 20 years.**

| <b>Study</b>  | <b>Year</b> | <b>Location</b> | <b>Patient Expectation<br/>For Antibiotic for ARTI</b> |
|---------------|-------------|-----------------|--------------------------------------------------------|
| Hamm          | 1996        | USA             | 65%                                                    |
| Shlomo Vinker | 2003        | Israel          | 25%                                                    |
| Martin        | 2004        | USA             | 76%                                                    |
| Soma          | 2005        | Norway          | 38%                                                    |

|               |      |           |     |
|---------------|------|-----------|-----|
| Panagakau     | 2011 | Greece    | 74% |
| McNulty       | 2013 | UK        | 53% |
| Zyoud         | 2015 | Palestine | 73% |
| Wong          | 2017 | China     | 10% |
| UL/Shannondoc | 2018 | Ireland   | 34% |

17

18
