# Supplementary material for: Medical management of acute upper respiratory infections in an urban primary care out-of-hours facility: cross-sectional study of patient presentations and expectations
Source: PubMed Central journal article supplement — BMJ Open. 2019 Feb 15;9(2):e025396. doi: 10.1136/bmjopen-2018-025396 (PMC6398638; doi:10.1136/bmjopen-2018-025396), 2019-02-15
Supplement: bmjopen-2018-025396supp003.pdf [file bmjopen-2018-025396supp003.pdf]

| <b>Supplementary Table D: Differences in expectation of antibiotics</b> |                |                           |                                           |                |                           |                                           |                |                           |                                           |                |
|-------------------------------------------------------------------------|----------------|---------------------------|-------------------------------------------|----------------|---------------------------|-------------------------------------------|----------------|---------------------------|-------------------------------------------|----------------|
|                                                                         |                | <b>Yes (vs no/unsure)</b> |                                           |                | <b>Unsure (vs yes/no)</b> |                                           |                | <b>No (vs yes/unsure)</b> |                                           |                |
|                                                                         |                | <b>%</b>                  | <b>Difference<br/>(95% CI difference)</b> | <b>p-value</b> | <b>%</b>                  | <b>Difference<br/>(95% CI difference)</b> | <b>p-value</b> | <b>%</b>                  | <b>Difference<br/>(95% CI difference)</b> | <b>p-value</b> |
| <b>Gender</b>                                                           | <b>Males</b>   | 32%                       | 4% (-5%, 13%)                             | 0.38           | 52%                       | 5% (-4%, 15%)                             | 0.28           | 16%                       | 9% (3%, 16%)                              | 0.002*         |
|                                                                         | <b>Females</b> | 36%                       |                                           |                | 58%                       |                                           |                | 7%                        |                                           |                |
| <b>Age</b>                                                              | <b>&lt;56</b>  | 34%                       | 4% (-17%, 20%)                            | 0.69           | 55%                       | 15% (-6%, 31%)                            | 0.16           | 11%                       | 11% (-7%, 14%)                            | 0.09           |
|                                                                         | <b>56+</b>     | 30%                       |                                           |                | 70%                       |                                           |                | 0%                        |                                           |                |
| <b>Eligibility for Free Care</b>                                        | <b>Yes</b>     | 38%                       | 8% (-1%, 17%)                             | 0.09           | 53%                       | 6% (-4%, 15%)                             | 0.23           | 9%                        | 2% (-4%, 10%)                             | 0.48           |
|                                                                         | <b>No</b>      | 30%                       |                                           |                | 59%                       |                                           |                | 12%                       |                                           |                |
| <b>First Consultation</b>                                               | <b>Yes</b>     | 31%                       | 6% (-3%, 15%)                             | 0.20           | 59%                       | 7% (-2%, 16%)                             | 0.15           | 10%                       | 1% (-5%, 7%)                              | 0.72           |
|                                                                         | <b>No</b>      | 37%                       |                                           |                | 52%                       |                                           |                | 11%                       |                                           |                |
